# Supplementary material for: Thioarylation of anilines using dual catalysis: two-step synthesis of phenothiazines
Source: Royal Society of Chemistry journal article supplement (doi:10.1039/d2ob01082h), 2022-01-01

**Supporting Information for:**

**Thioarylation of Anilines using Dual Catalysis: Two-Step Synthesis of Phenothiazines**

Amy C. Dodds, Sabrina Puddu and Andrew Sutherland\*

*School of Chemistry, The Joseph Black Building, University of Glasgow, Glasgow G12 8QQ,  
UK. Email: Andrew.Sutherland@glasgow.ac.uk.*

**Table of Contents**

|                                                                                 |        |
|---------------------------------------------------------------------------------|--------|
| 1. $^1\text{H}$ and $^{13}\text{C}\{^1\text{H}\}$ NMR Spectra for all Compounds | S2–S69 |
|---------------------------------------------------------------------------------|--------|

400 MHz, CDCl<sub>3</sub>

<sup>1</sup>H and <sup>13</sup>C{<sup>1</sup>H} NMR Spectra for all Compounds

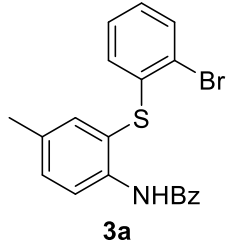

8.95  
8.62  
8.60  
7.68  
7.67  
7.67  
7.66  
7.66  
7.65  
7.55  
7.55  
7.53  
7.53  
7.52  
7.51  
7.51  
7.50  
7.50  
7.49  
7.48  
7.48  
7.47  
7.47  
7.43  
7.42  
7.41  
7.41  
7.40  
7.39  
7.39  
7.39  
7.38  
7.37  
7.37  
7.36  
7.26 CDCl<sub>3</sub>  
7.12  
7.11  
7.10  
7.10  
7.10  
7.08  
7.08  
7.01  
7.00  
6.99  
6.98  
6.97  
6.96  
6.67  
6.66  
6.64  
2.38

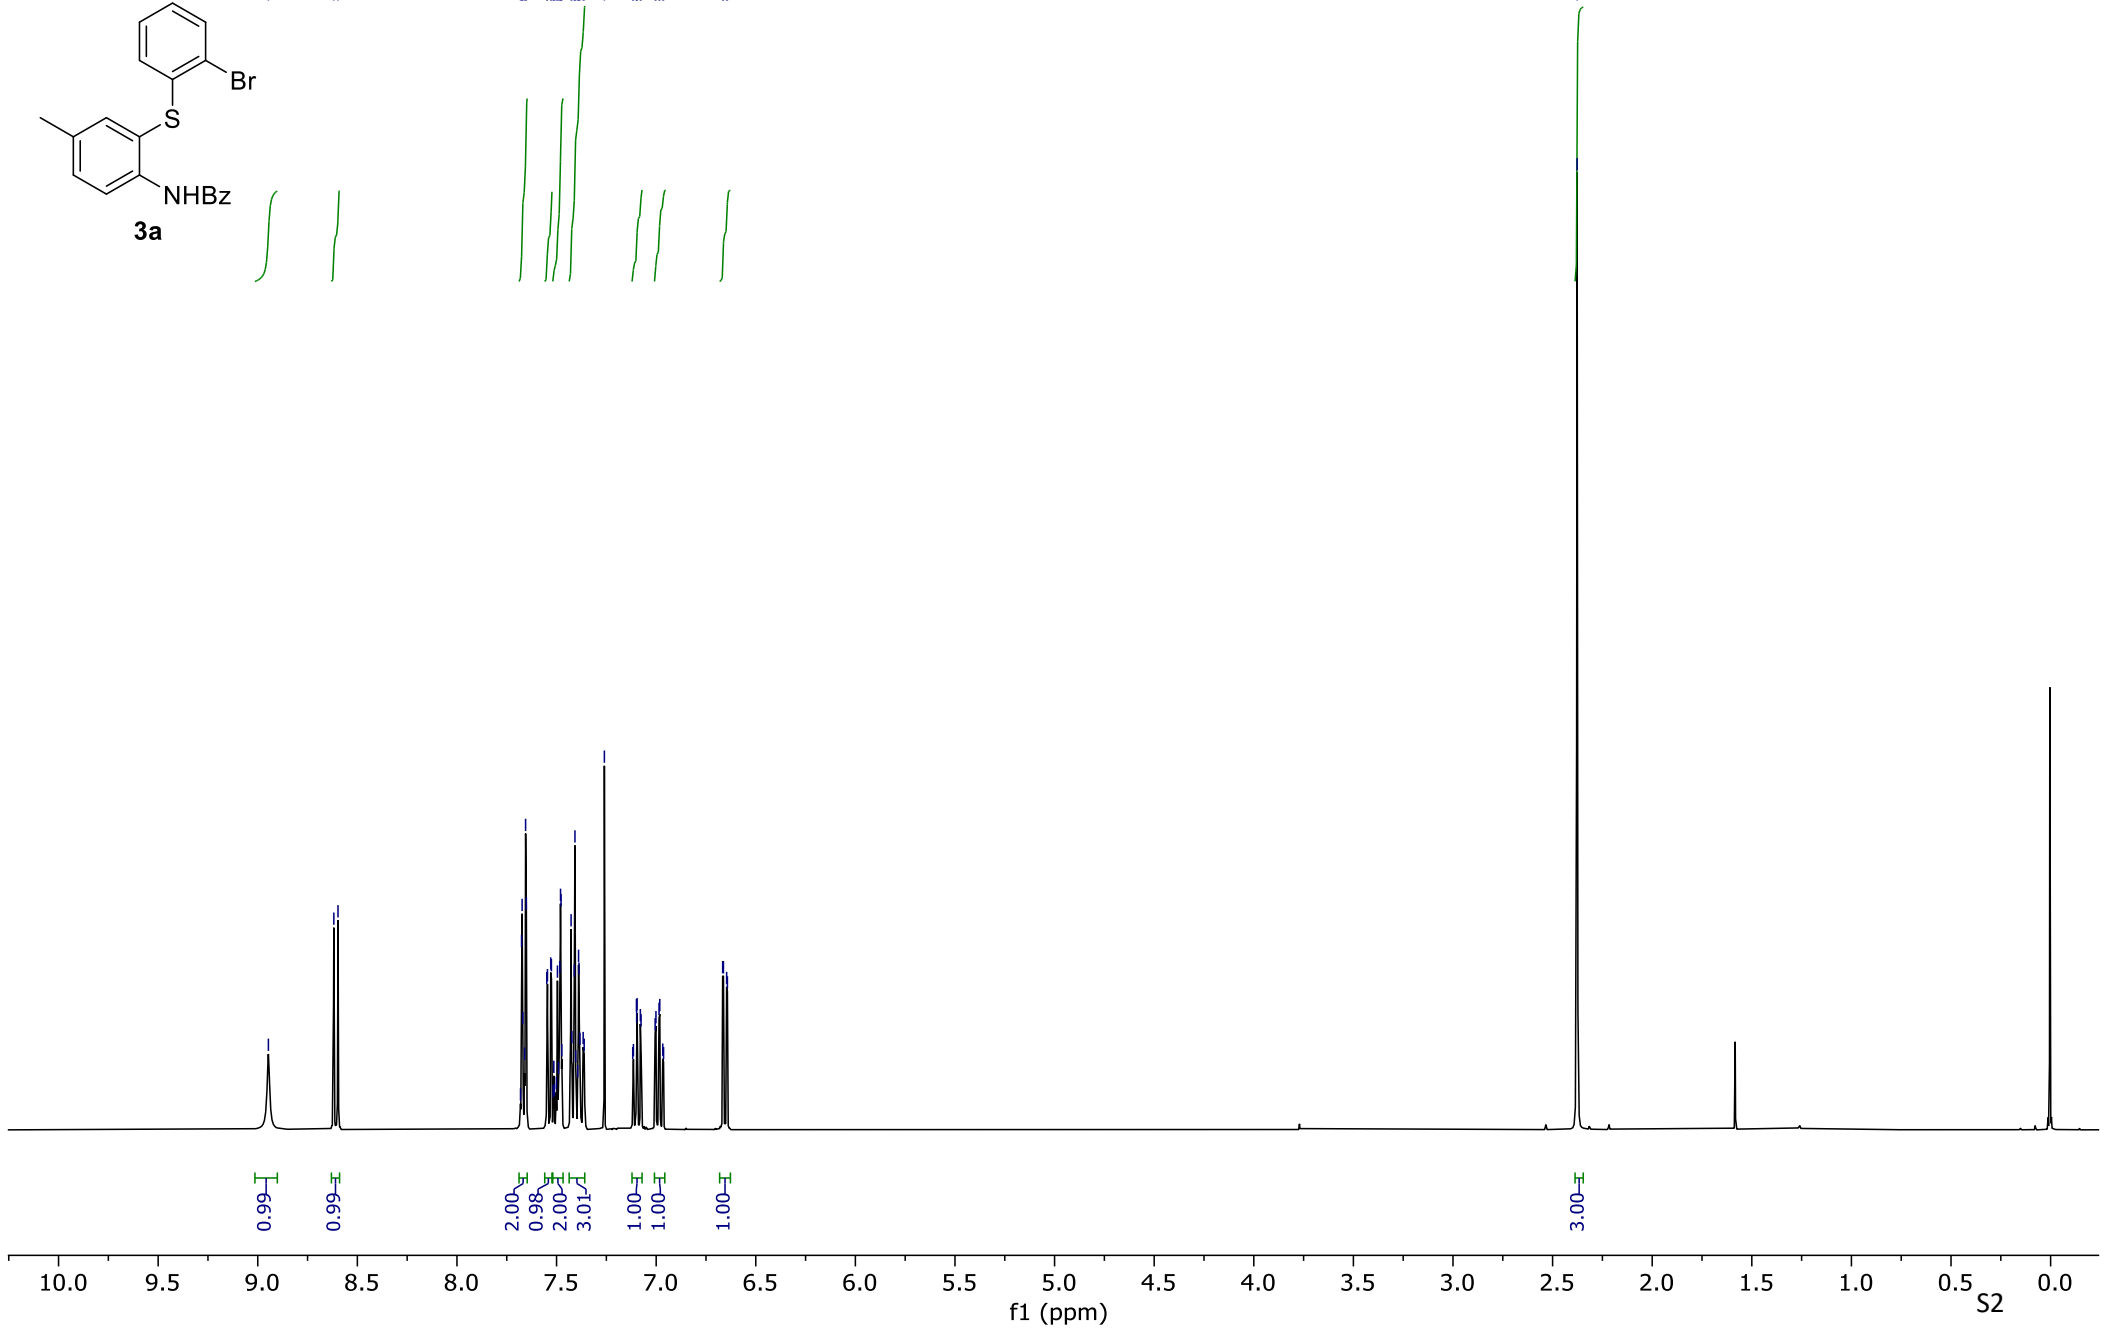

101 MHz, CDCl<sub>3</sub>

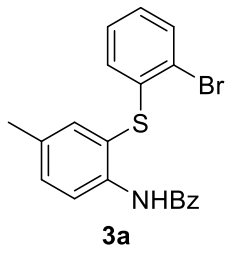

165.17  
137.99  
137.53  
137.25  
134.74  
134.71  
133.10  
132.64  
132.03  
128.89  
128.40  
127.35  
127.32  
127.06  
121.23  
120.86  
119.08

77.16 CDCl<sub>3</sub>

20.84

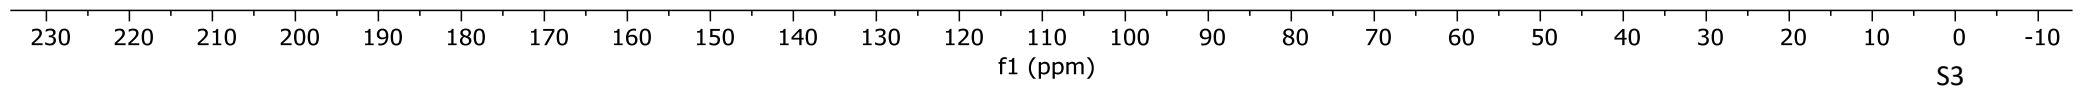

S3

400 MHz, CDCl<sub>3</sub>

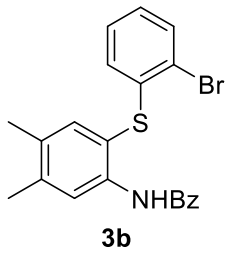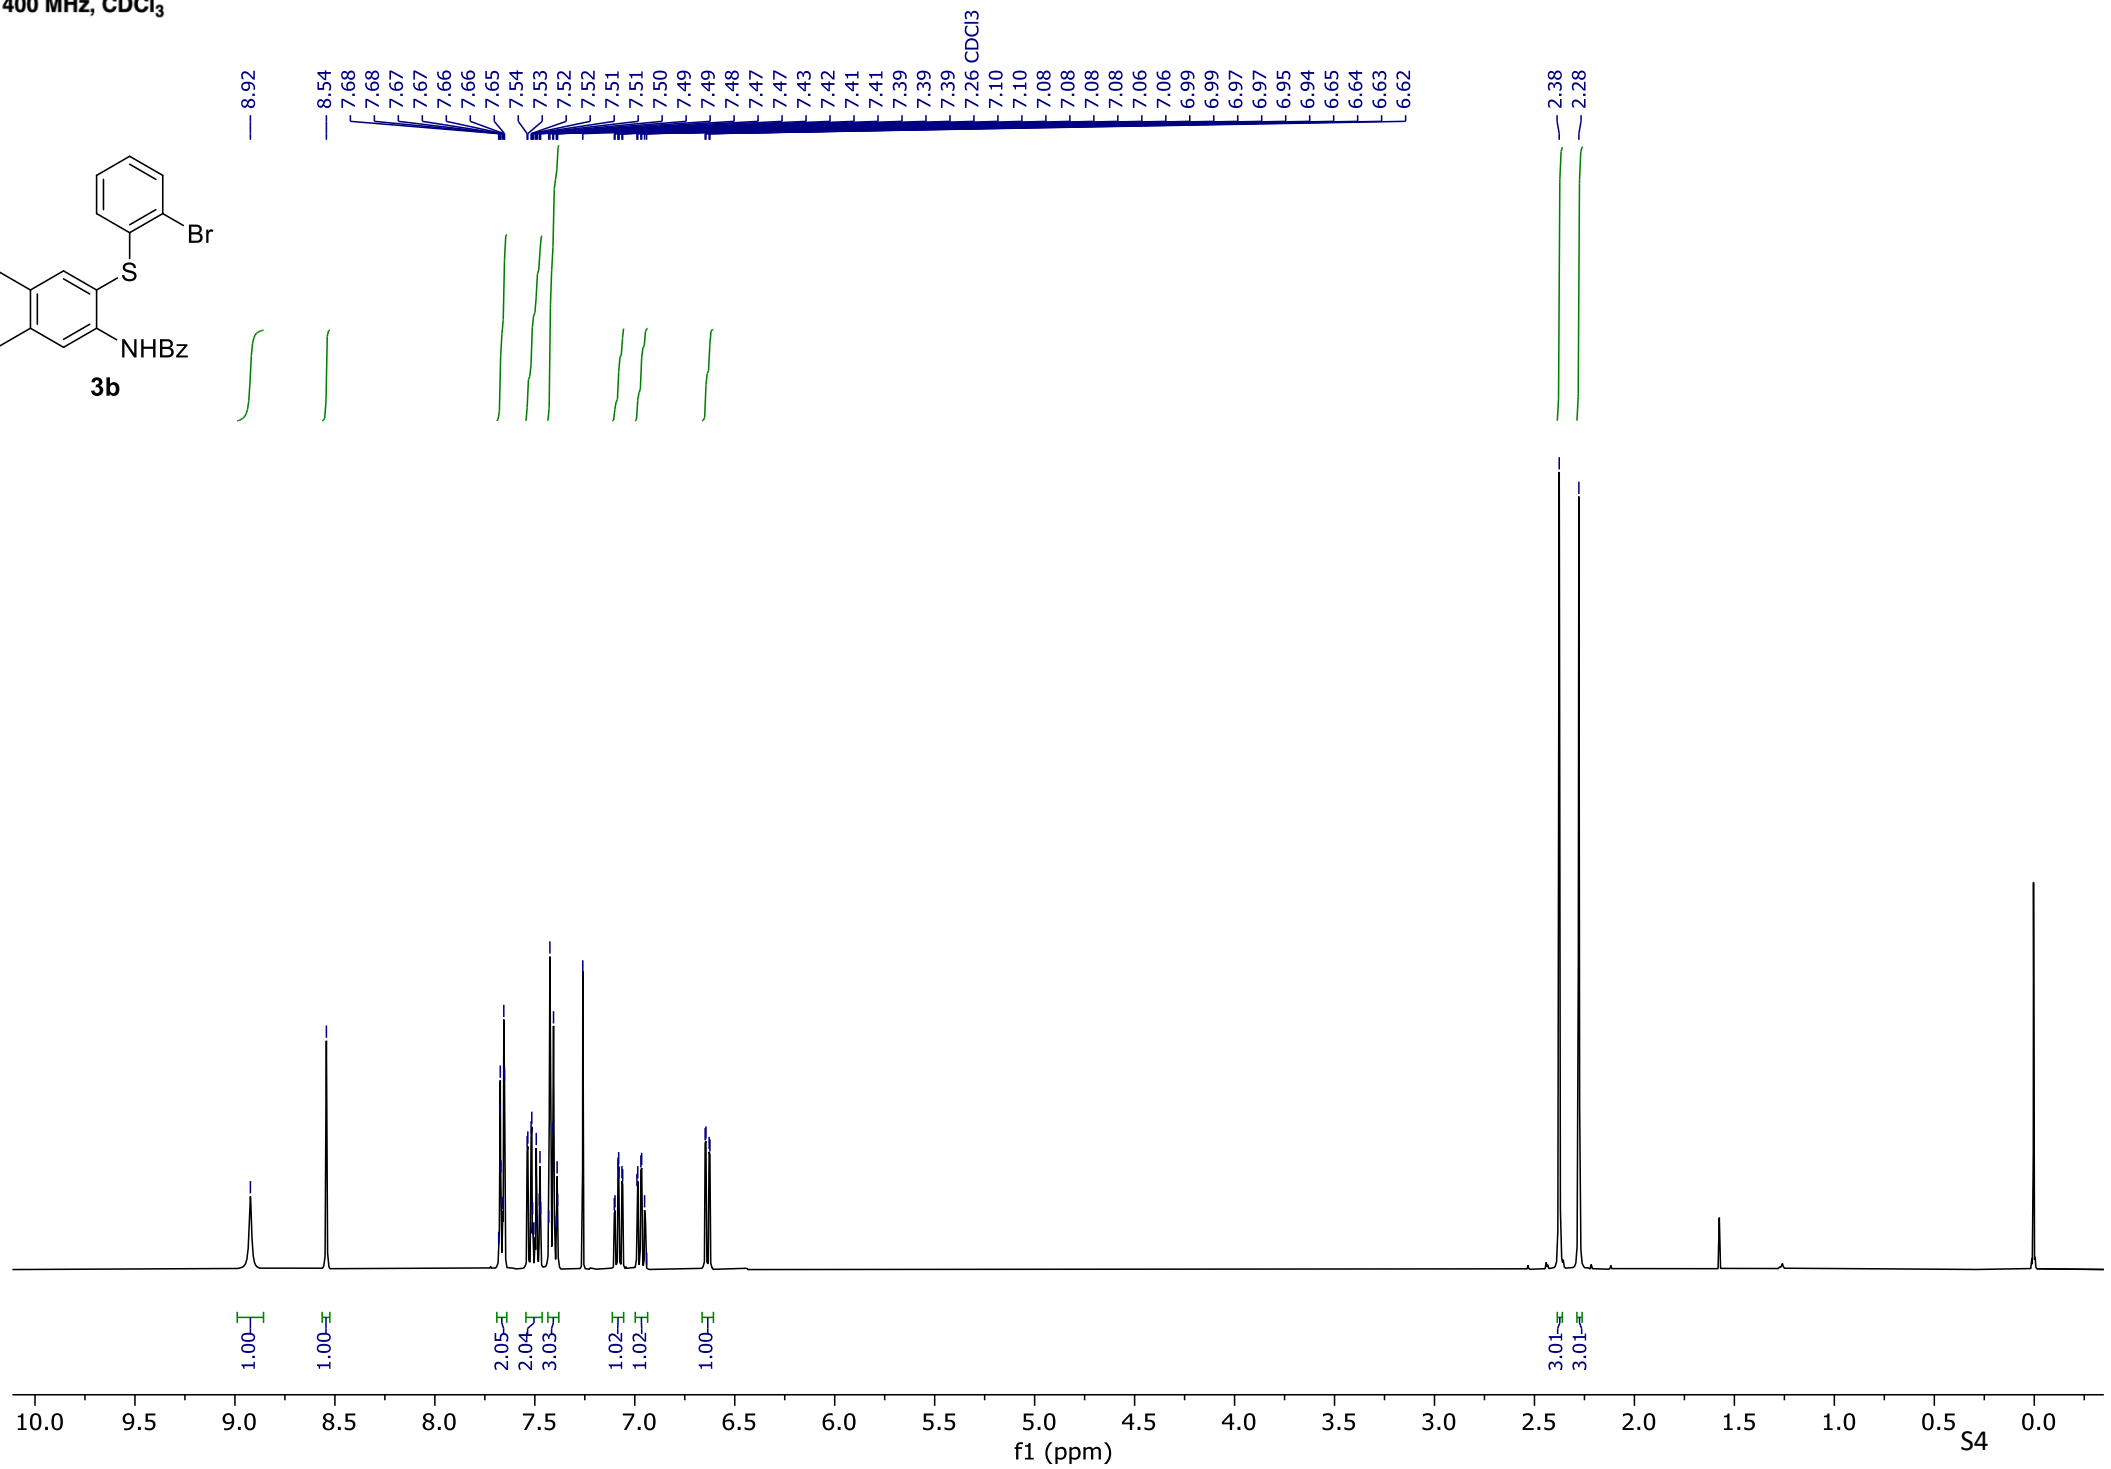

101 MHz, CDCl<sub>3</sub>

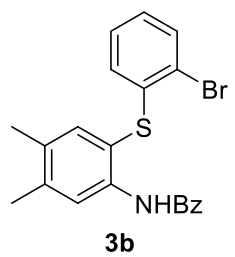

165.12  
141.25  
138.22  
137.89  
137.65  
134.79  
133.58  
133.04  
131.99  
128.89  
128.33  
127.13  
127.05  
127.05  
122.07  
120.98  
115.84  
77.16 CDCl<sub>3</sub>  
20.42  
19.31

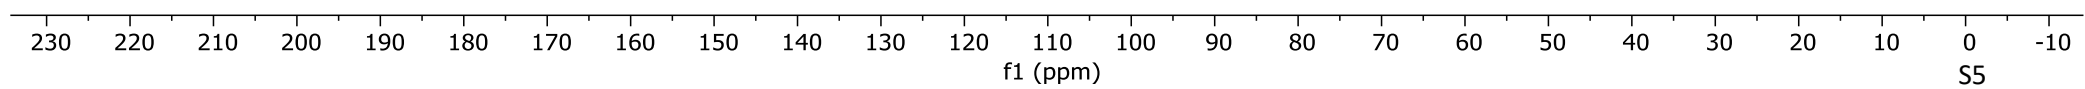

400 MHz, CDCl<sub>3</sub>

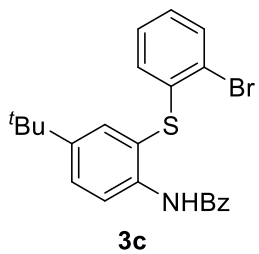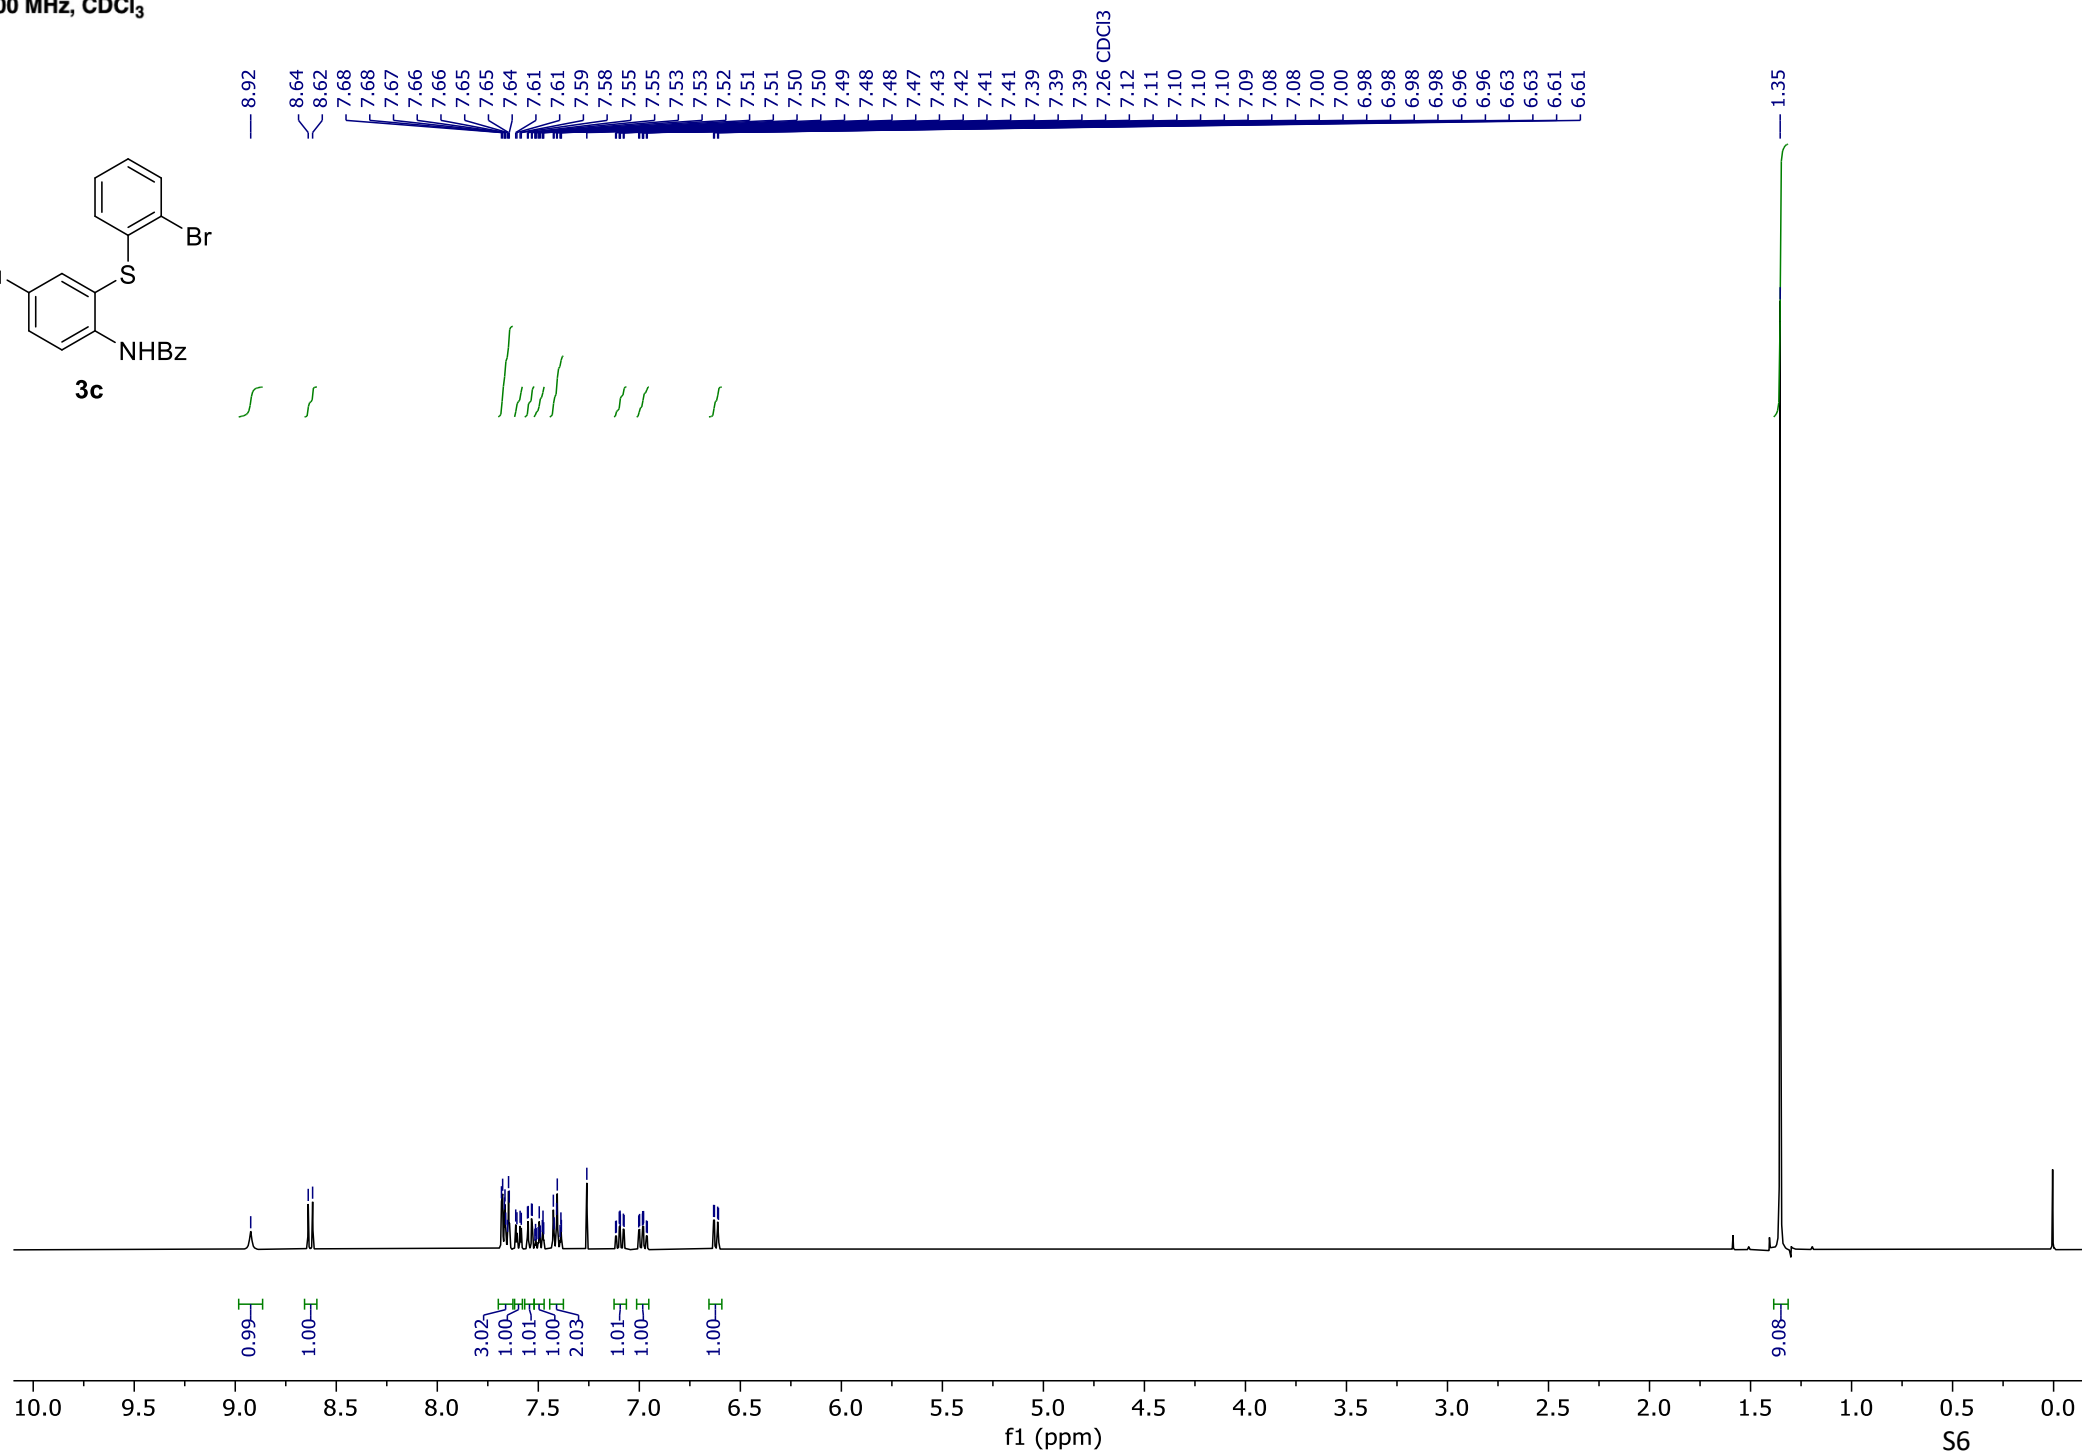

101 MHz, CDCl<sub>3</sub>

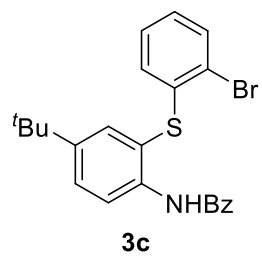

165.21  
148.19  
137.93  
137.37  
134.75  
134.14  
133.10  
132.03  
129.07  
128.89  
128.41  
127.23  
127.09  
127.07  
121.06  
120.74  
118.80  
77.16 CDCl<sub>3</sub>  
34.71  
31.43

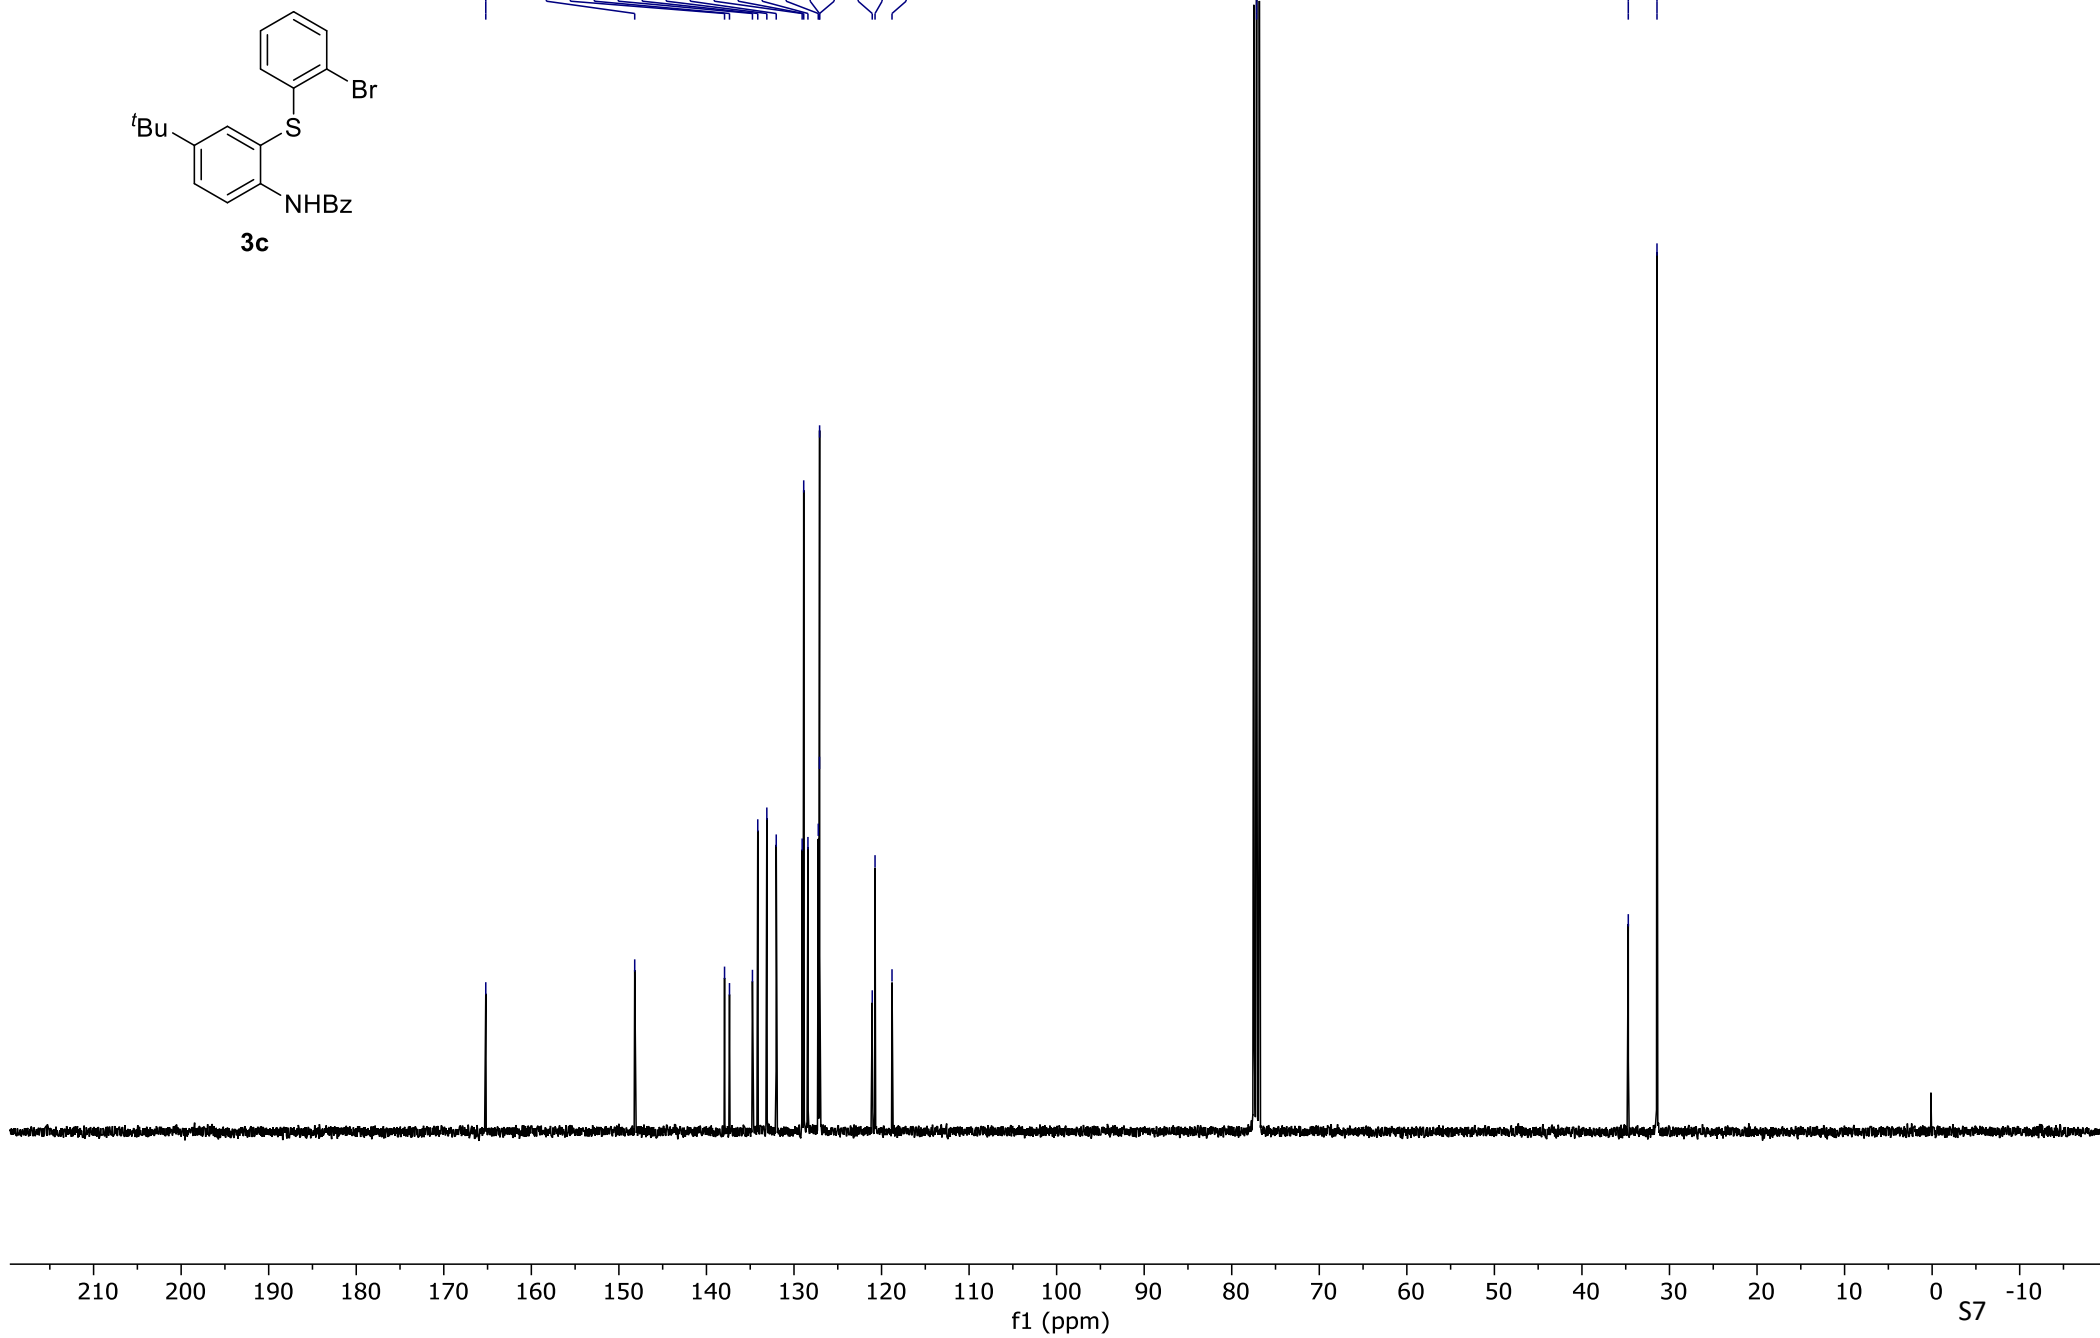

400 MHz, CDCl<sub>3</sub>

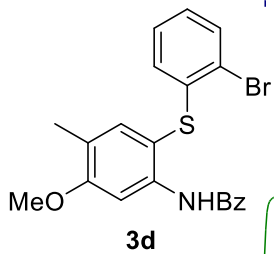

9.09

8.44

7.71

7.70

7.70

7.68

7.68

7.54

7.54

7.53

7.52

7.52

7.51

7.51

7.50

7.49

7.48

7.44

7.44

7.42

7.42

7.40

7.40

7.26 CDCl<sub>3</sub>

7.11

7.11

7.09

7.09

7.09

7.07

7.07

6.99

6.99

6.97

6.97

6.97

6.95

6.95

6.62

6.62

6.60

6.60

3.97

2.22

1.01

1.01

2.02

2.02

3.01

1.01

1.01

1.00

3.00

3.01

10.0 9.5 9.0 8.5 8.0 7.5 7.0 6.5 6.0 5.5 5.0 4.5 4.0 3.5 3.0 2.5 2.0 1.5 1.0 0.5 0.0

f1 (ppm)

S8



101 MHz, CDCl<sub>3</sub>

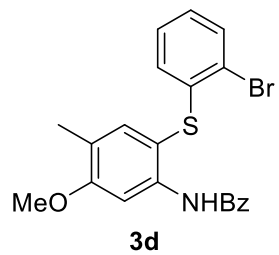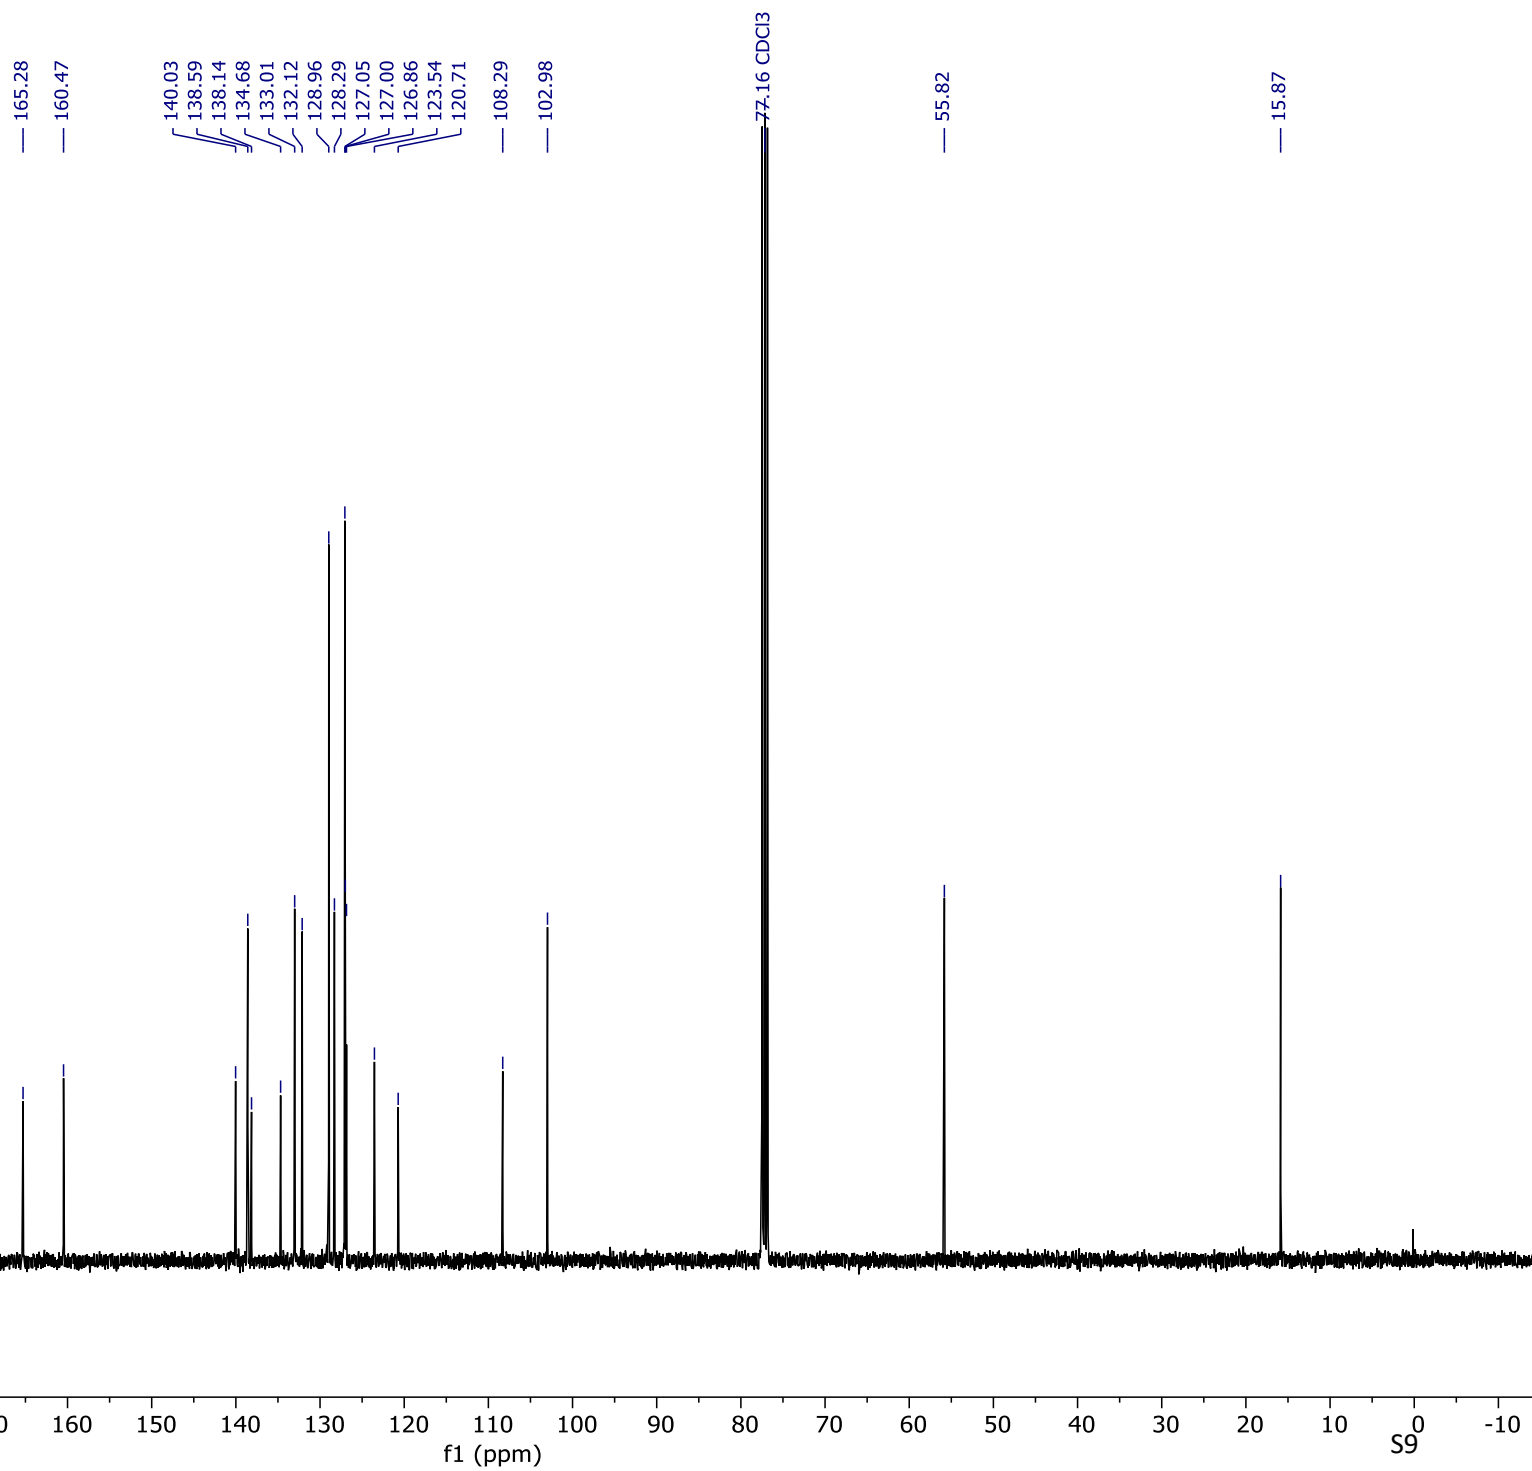

400 MHz, CDCl<sub>3</sub>

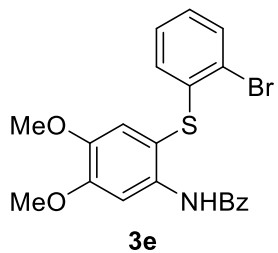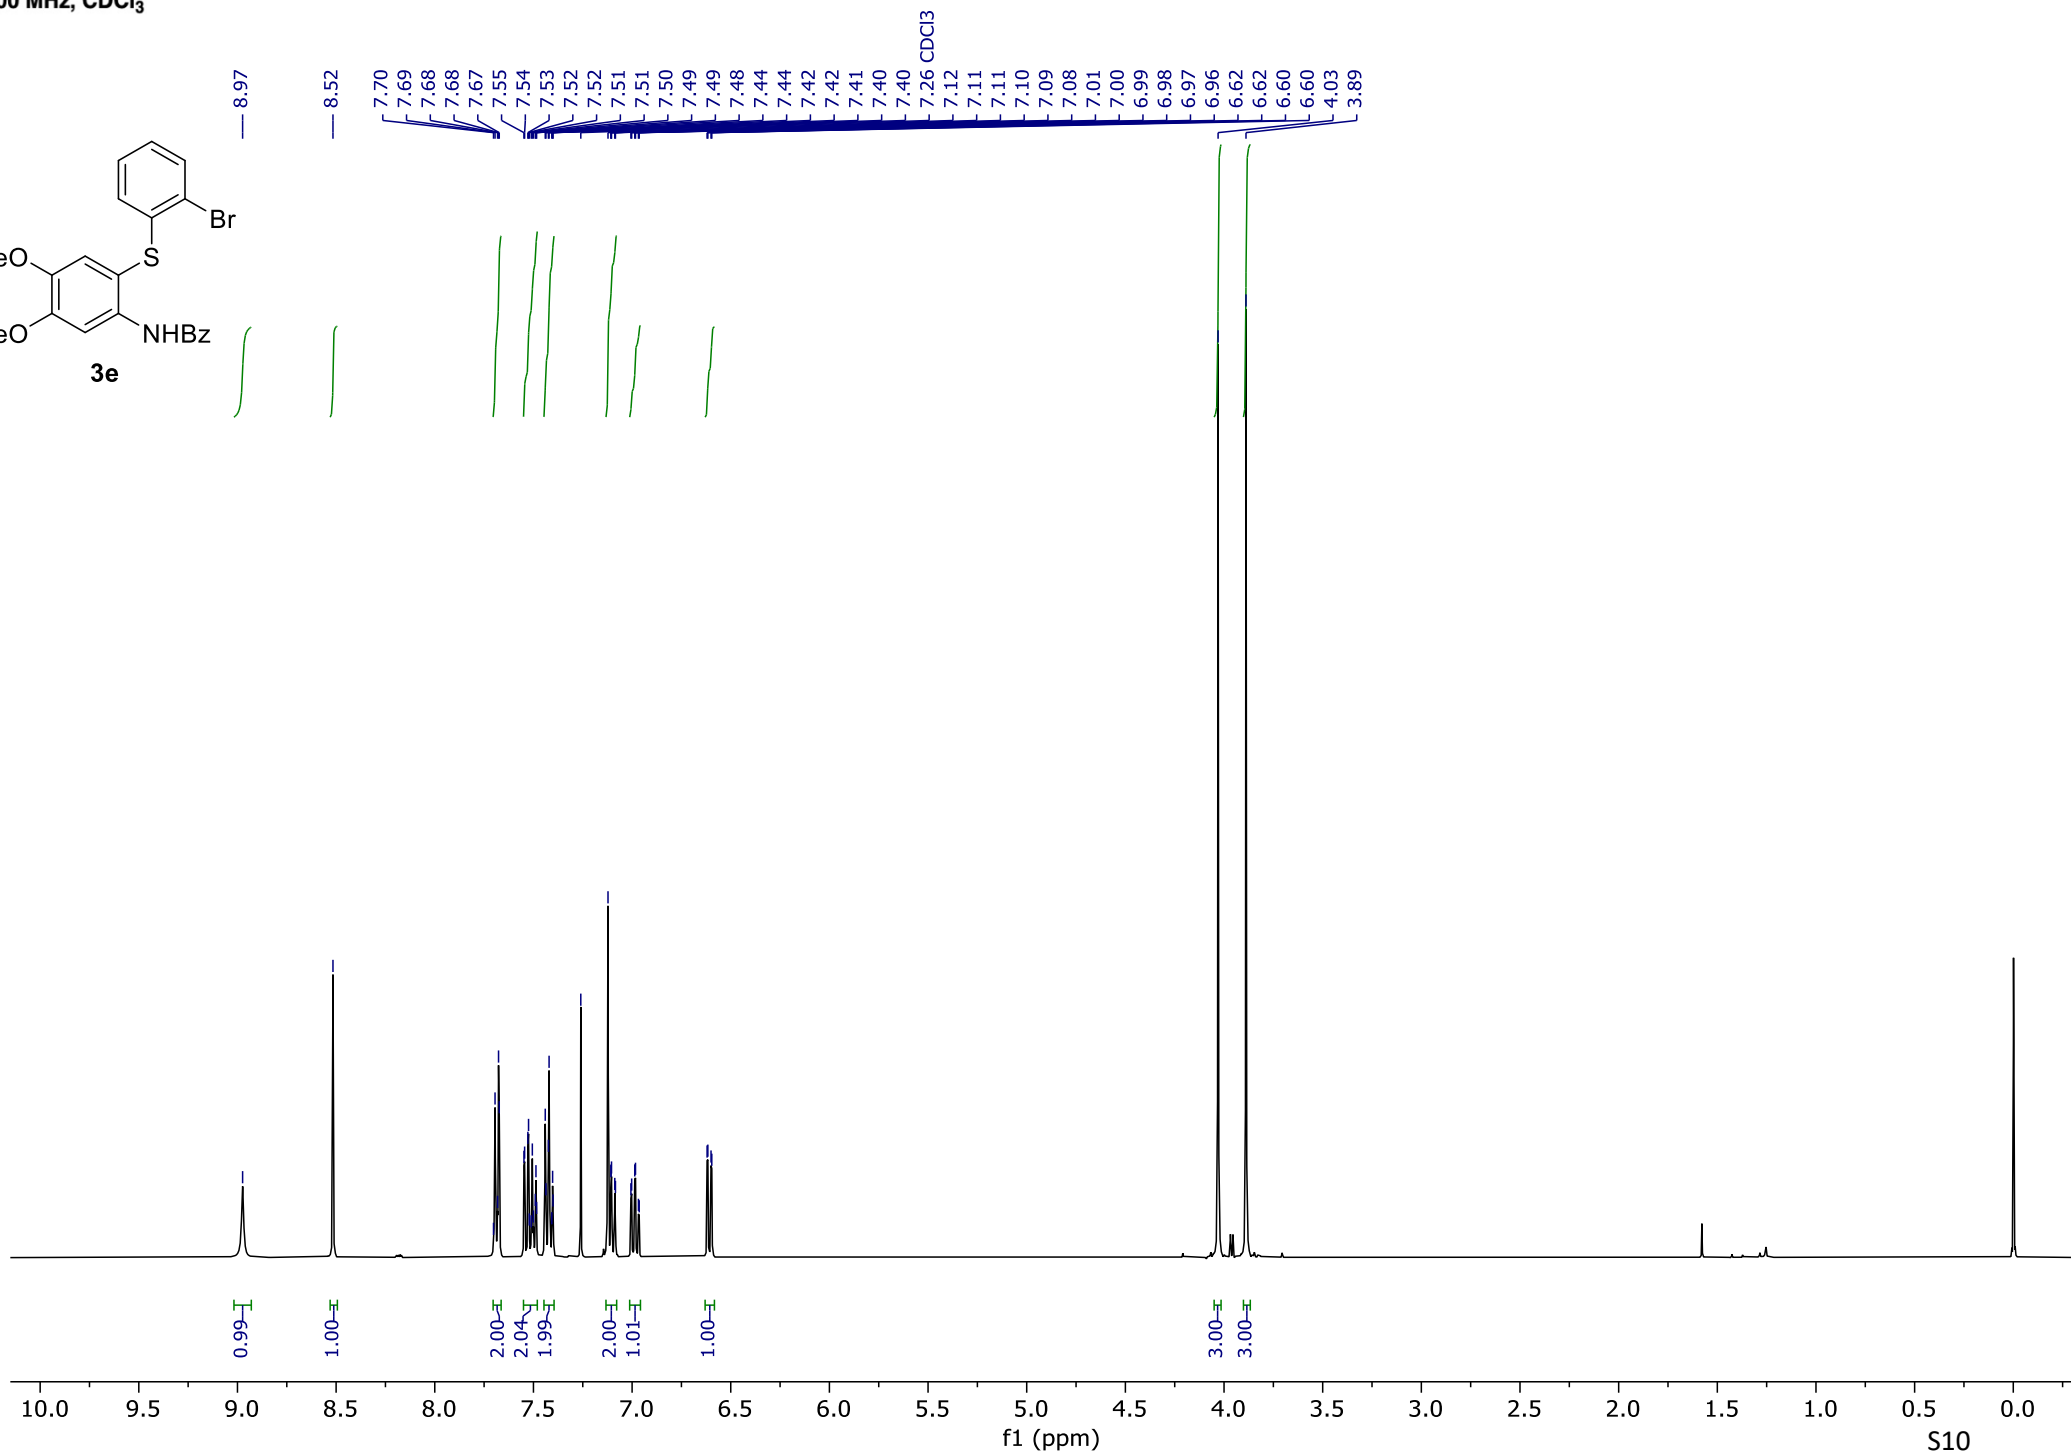

101 MHz, CDCl<sub>3</sub>

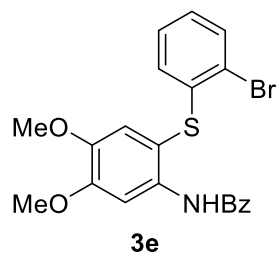

165.18  
151.65  
145.78  
137.78  
135.55  
134.66  
133.09  
132.12  
128.97  
128.39  
127.16  
127.01  
126.76  
120.70  
118.93  
108.58  
104.66

77.16 CDCl<sub>3</sub>

56.43  
56.33

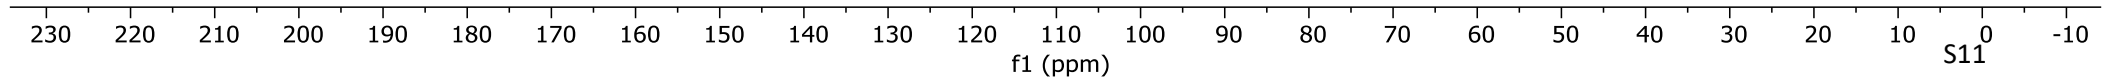

400 MHz, CDCl<sub>3</sub>

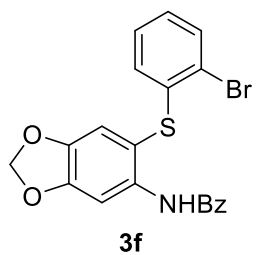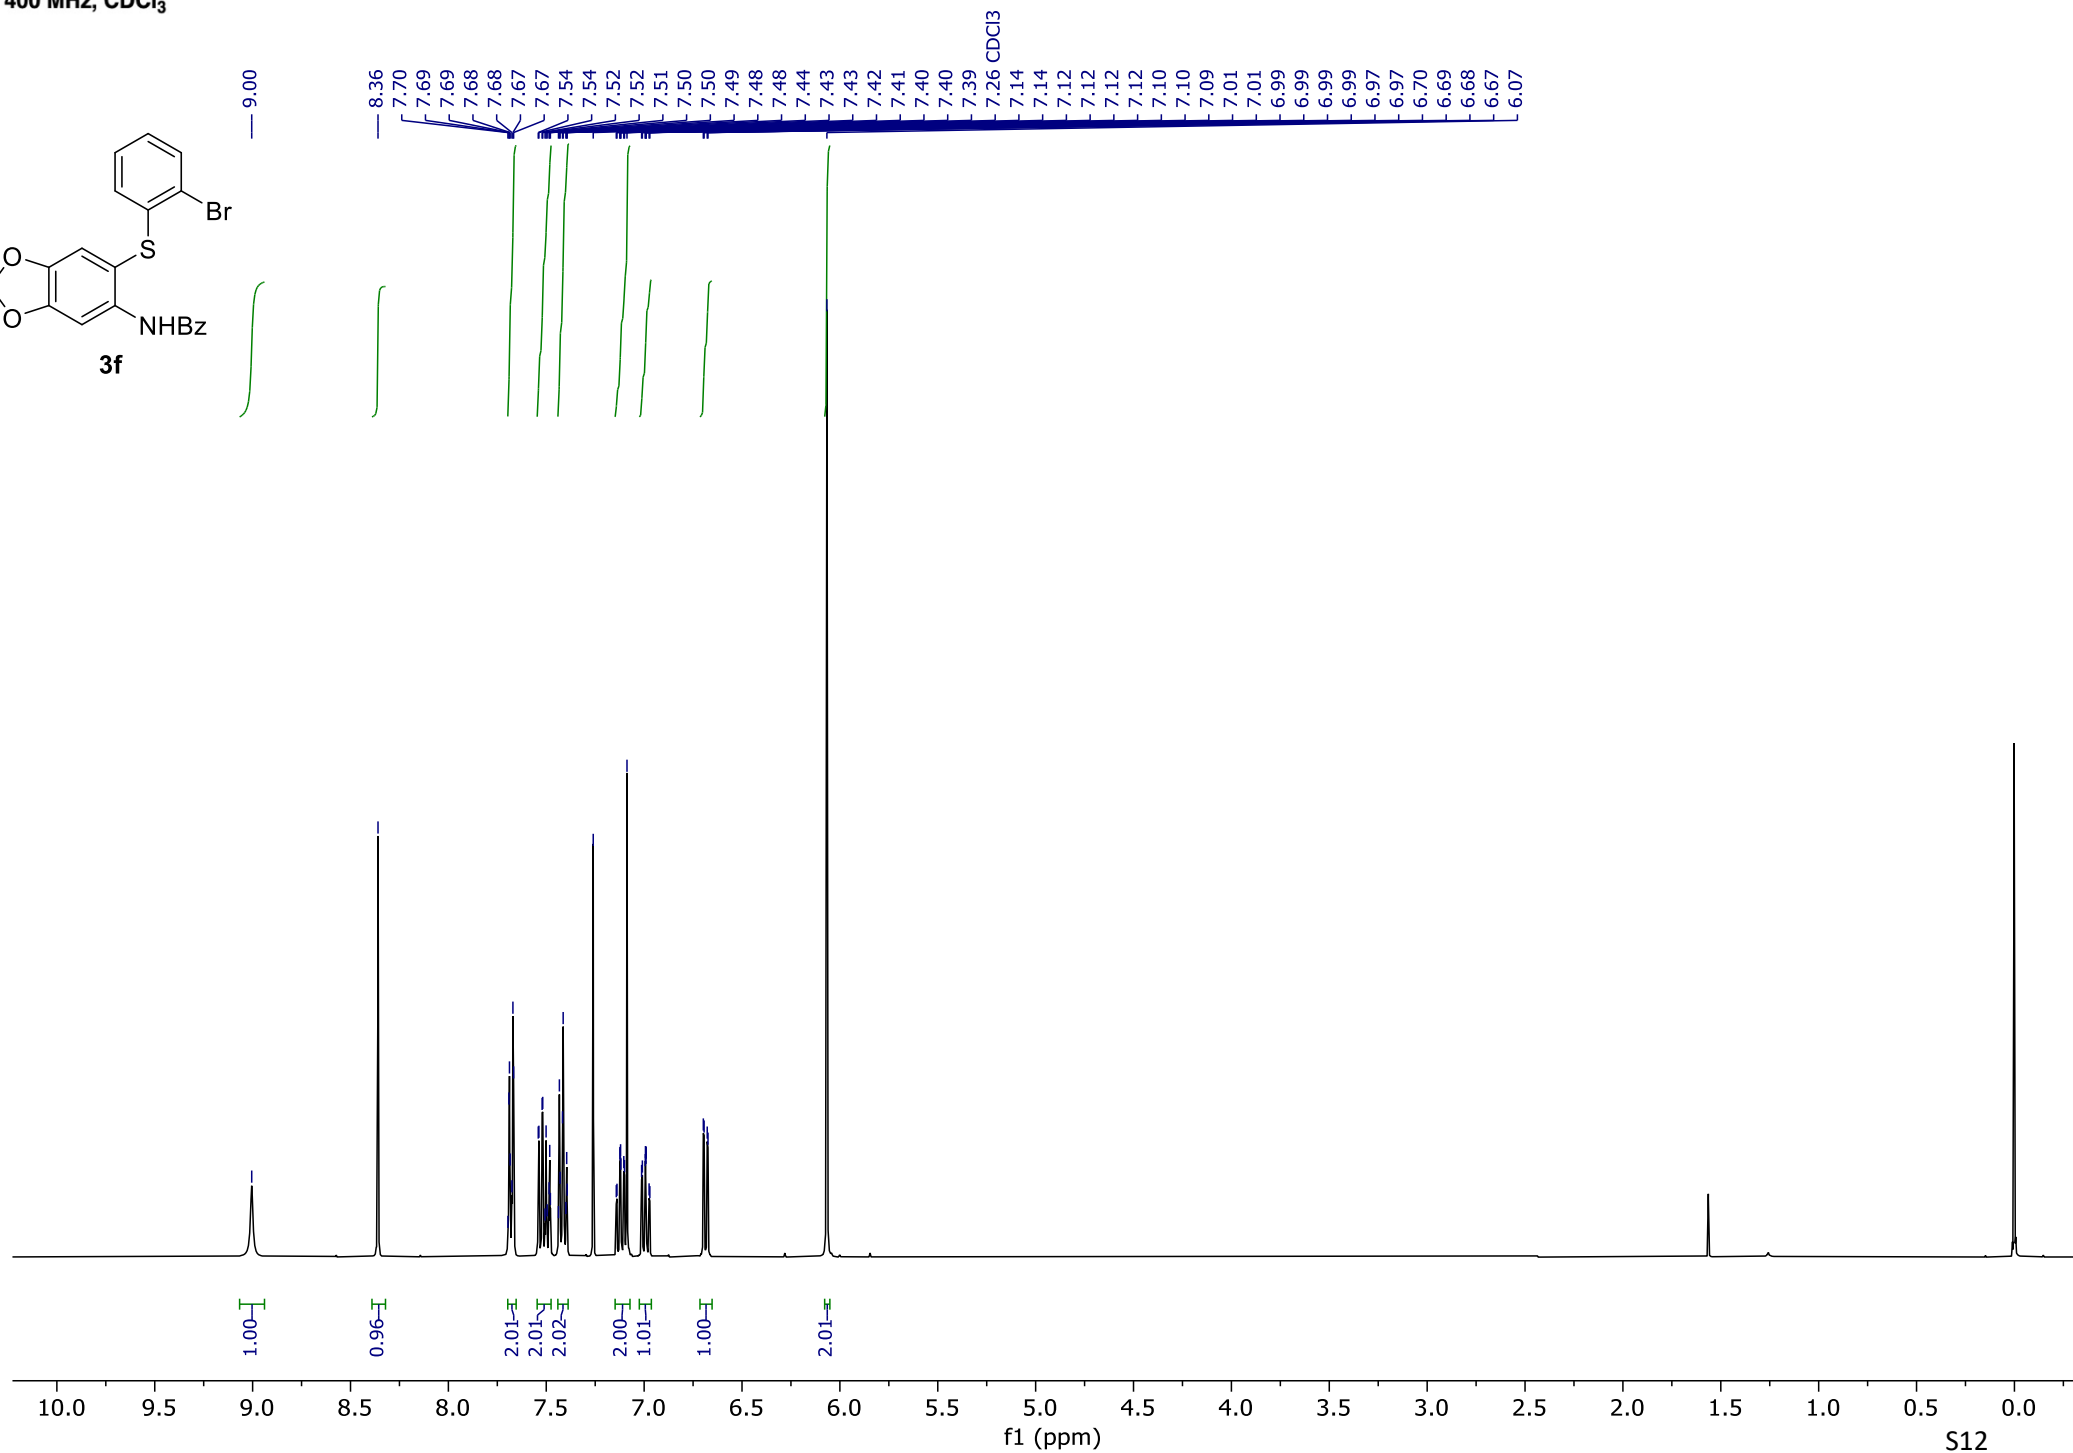

101 MHz, CDCl<sub>3</sub>

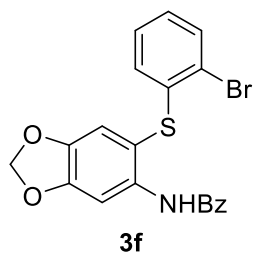

— 165.04  
— 150.56  
— 144.32  
— 137.52  
— 136.28  
— 134.62  
— 133.14  
— 132.11  
— 128.93  
— 128.40  
— 127.34  
— 127.06  
— 127.01  
— 120.96  
— 115.75  
— 110.20  
— 102.94  
— 102.15

77.16 CDCl<sub>3</sub>

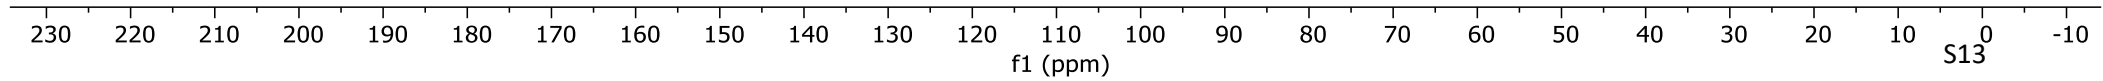

400 MHz, CDCl<sub>3</sub>

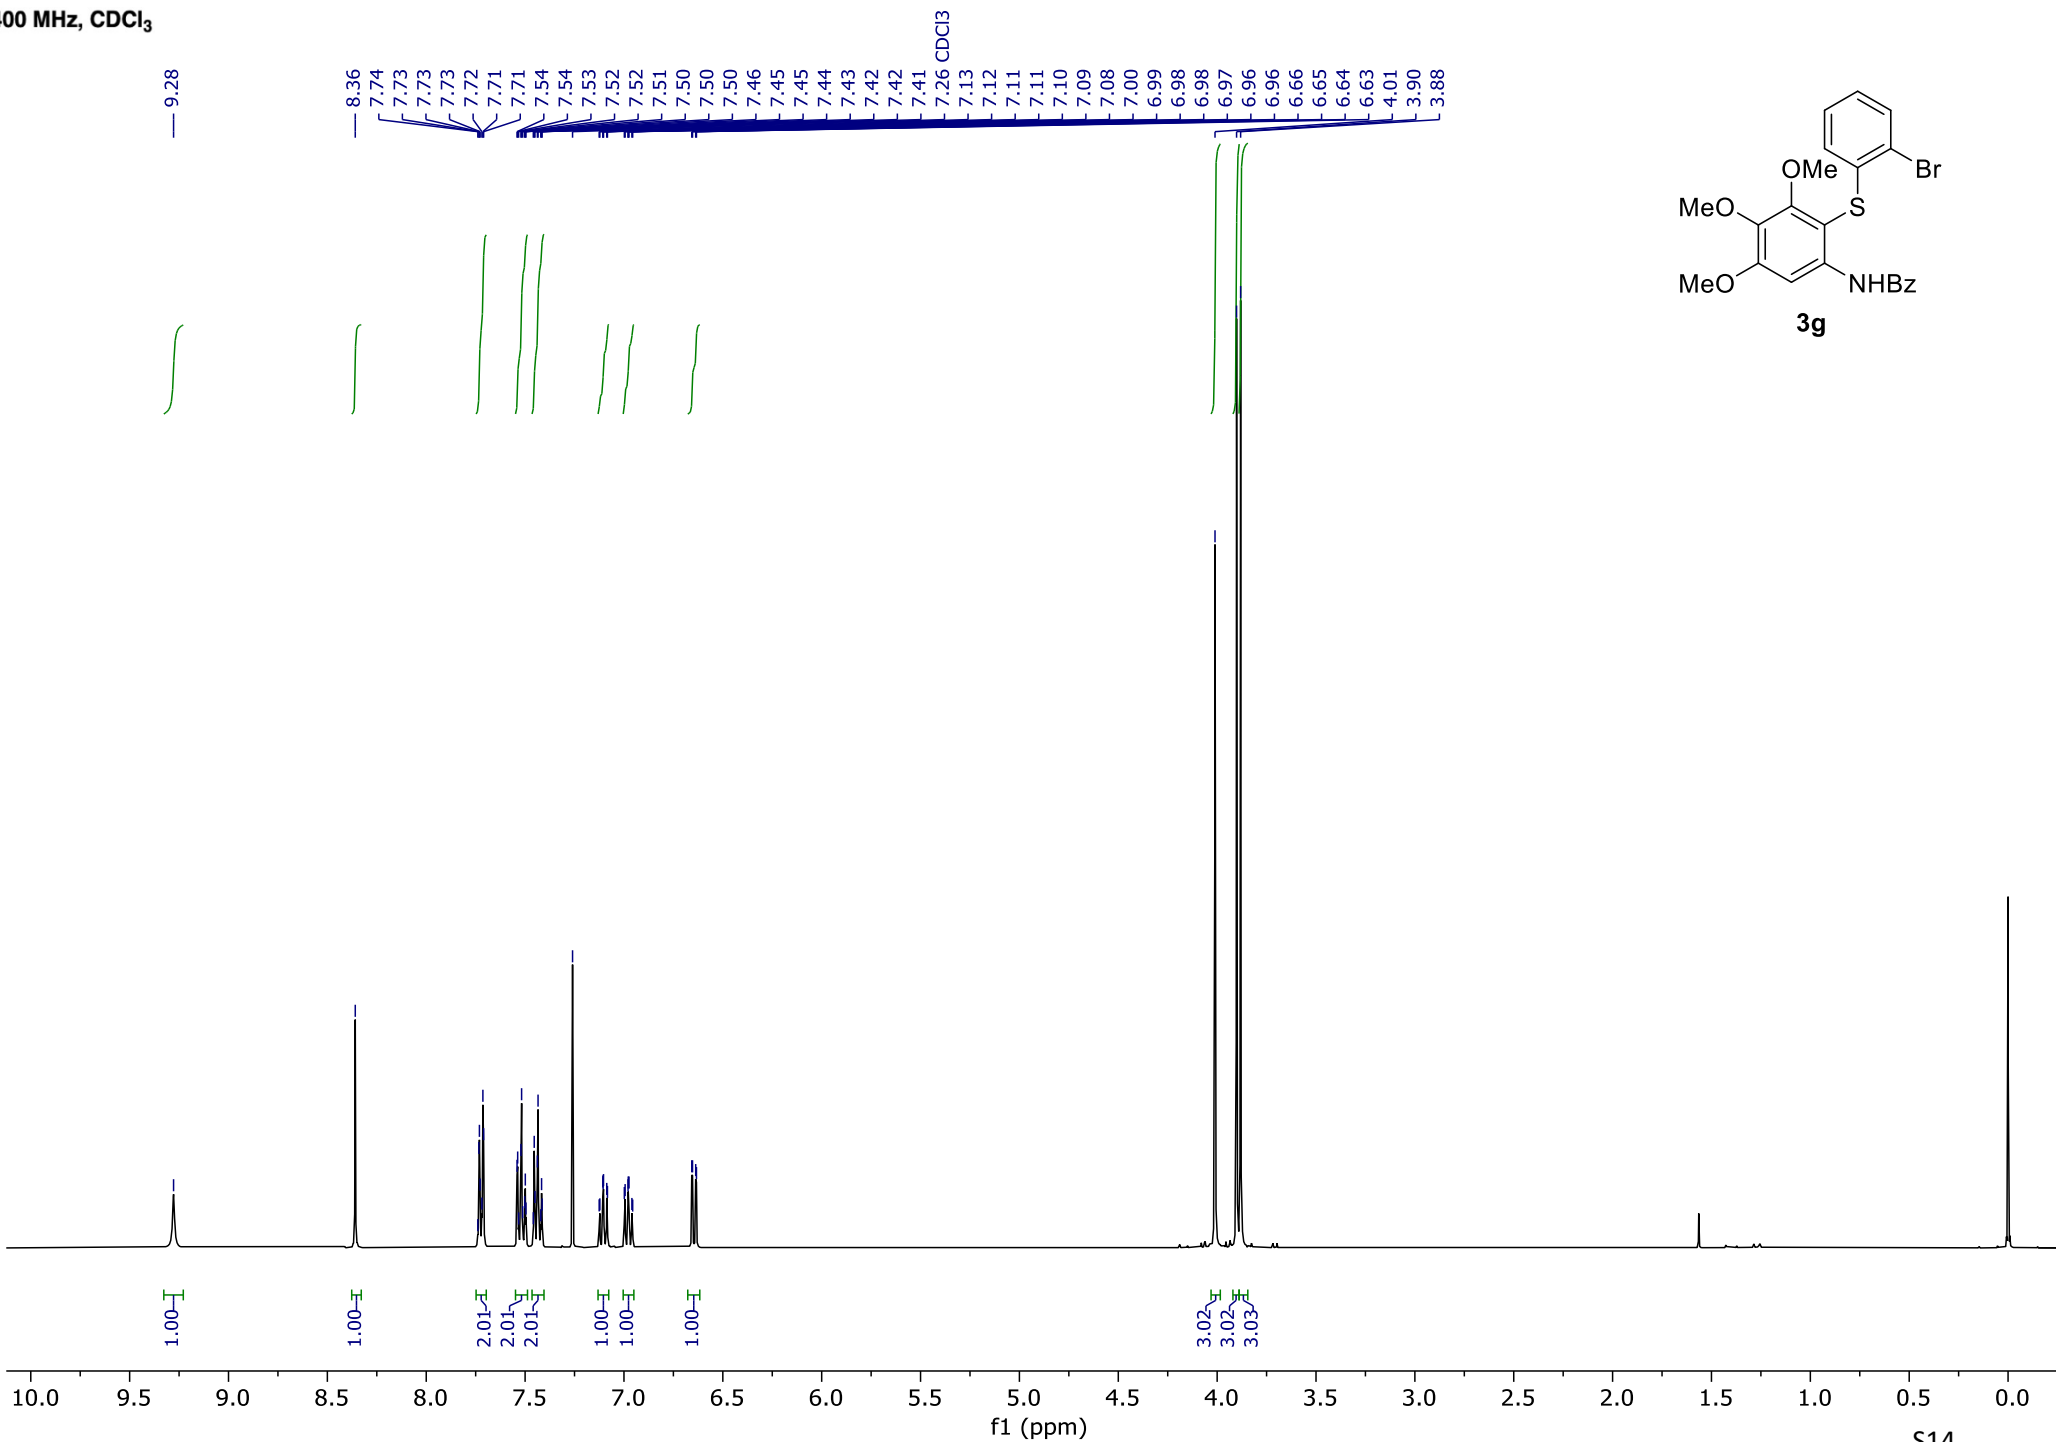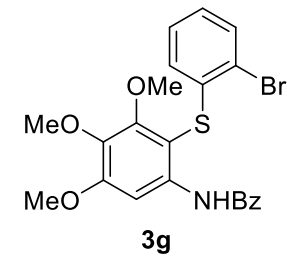

101 MHz, CDCl<sub>3</sub>

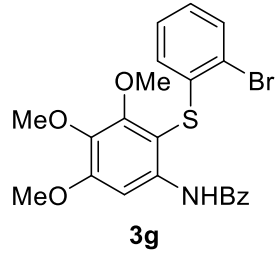

165.37  
156.35  
155.83  
139.10  
137.57  
137.56  
134.64  
133.08  
132.21  
129.00  
128.32  
127.09  
126.83  
121.05  
104.54  
100.28  
77.16 CDCl<sub>3</sub>  
61.99  
61.34  
56.34

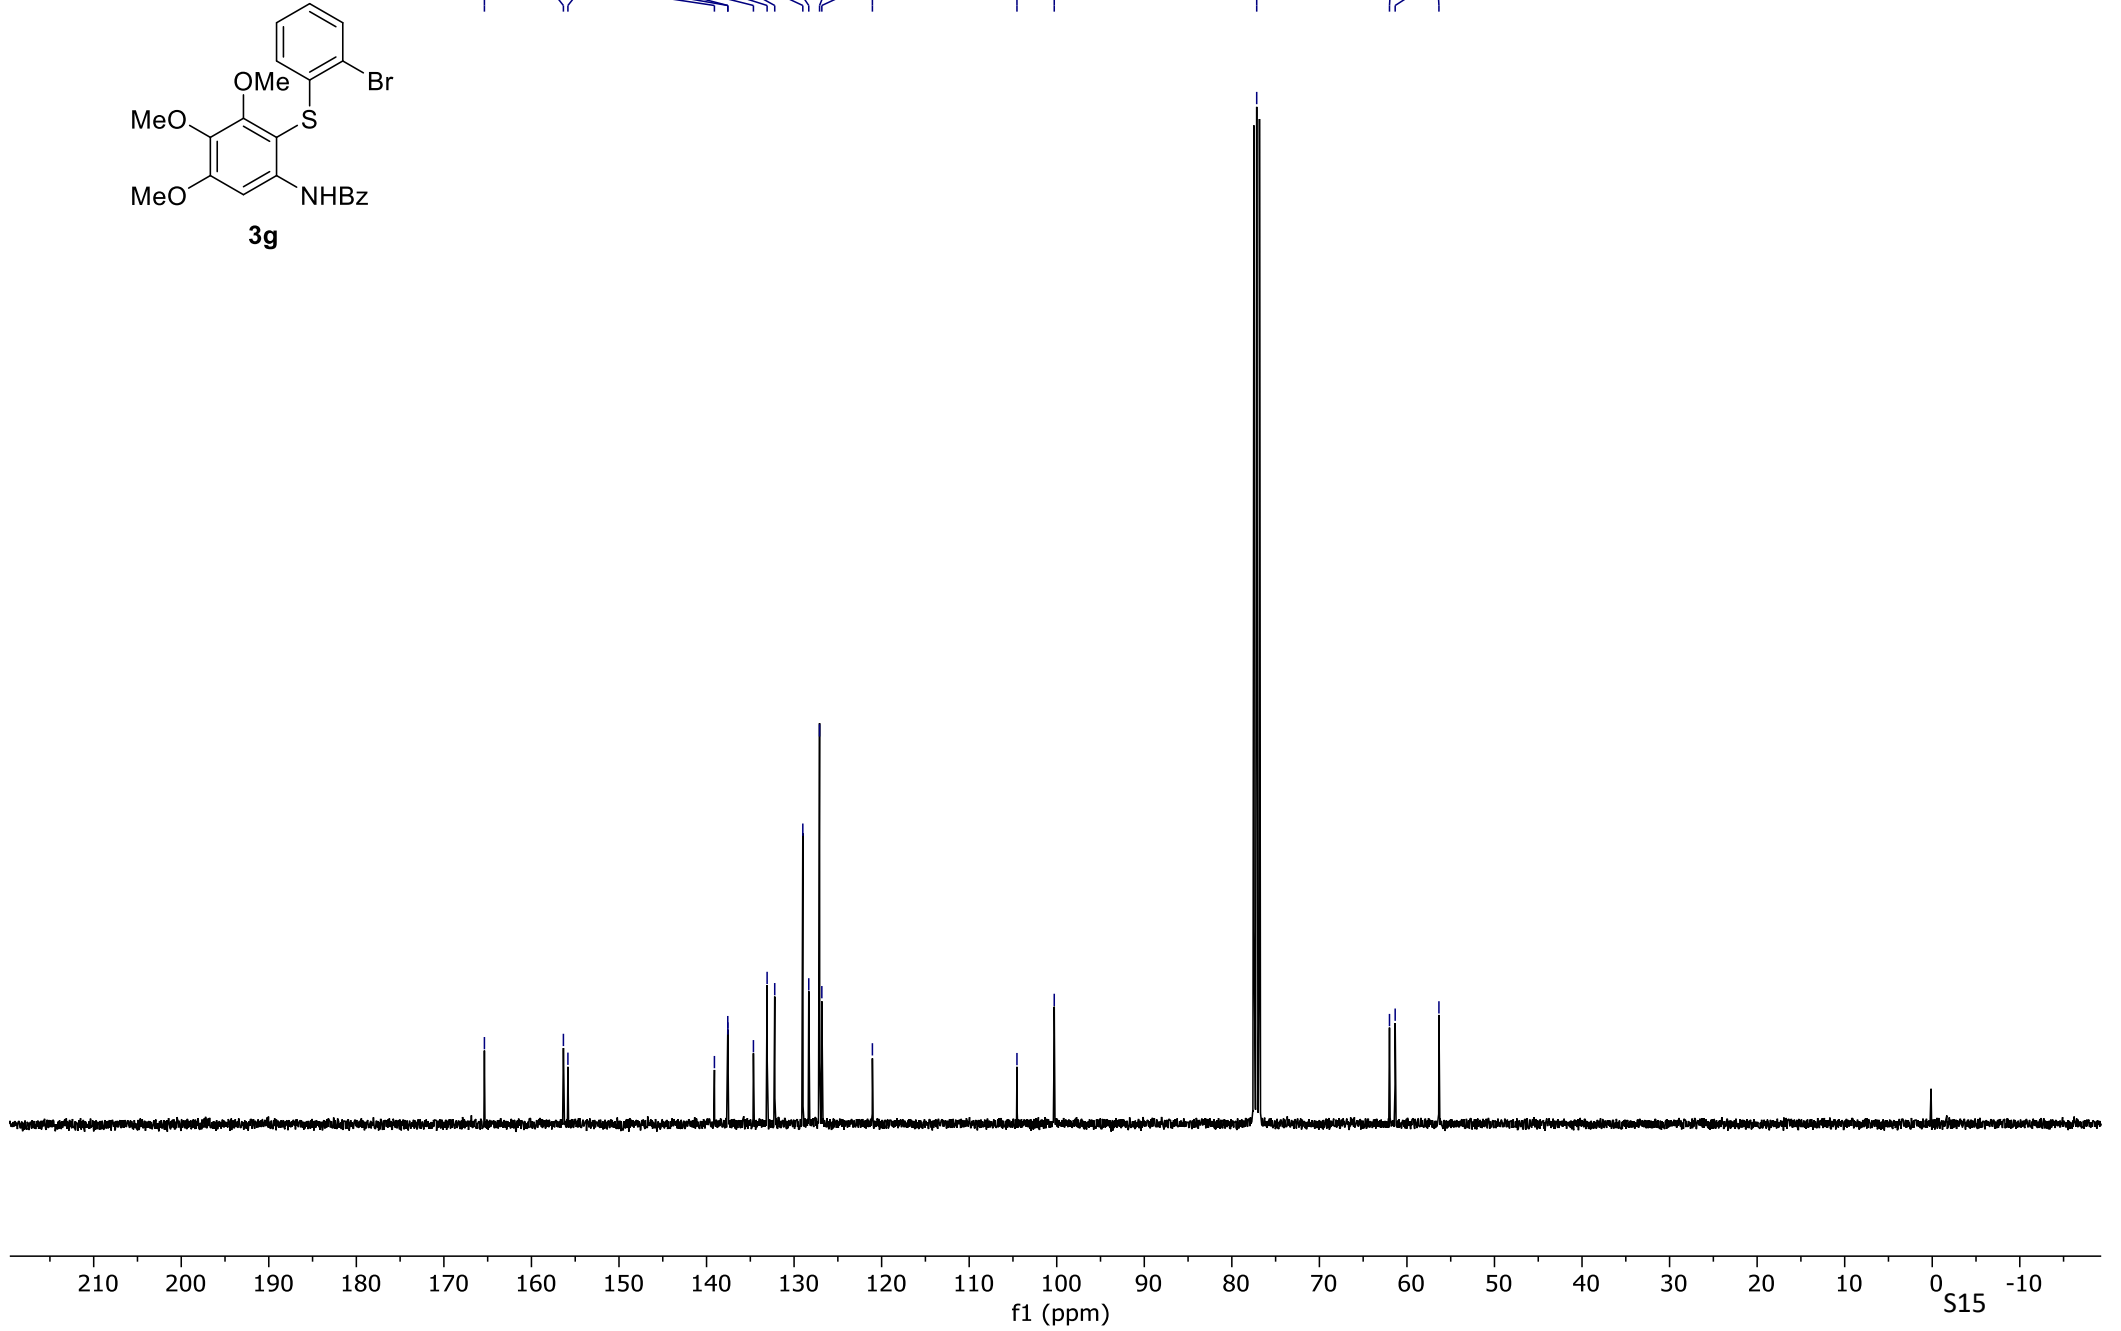

400 MHz, CDCl<sub>3</sub>

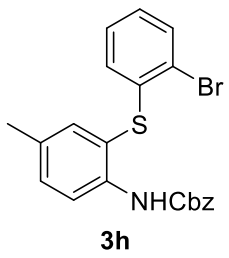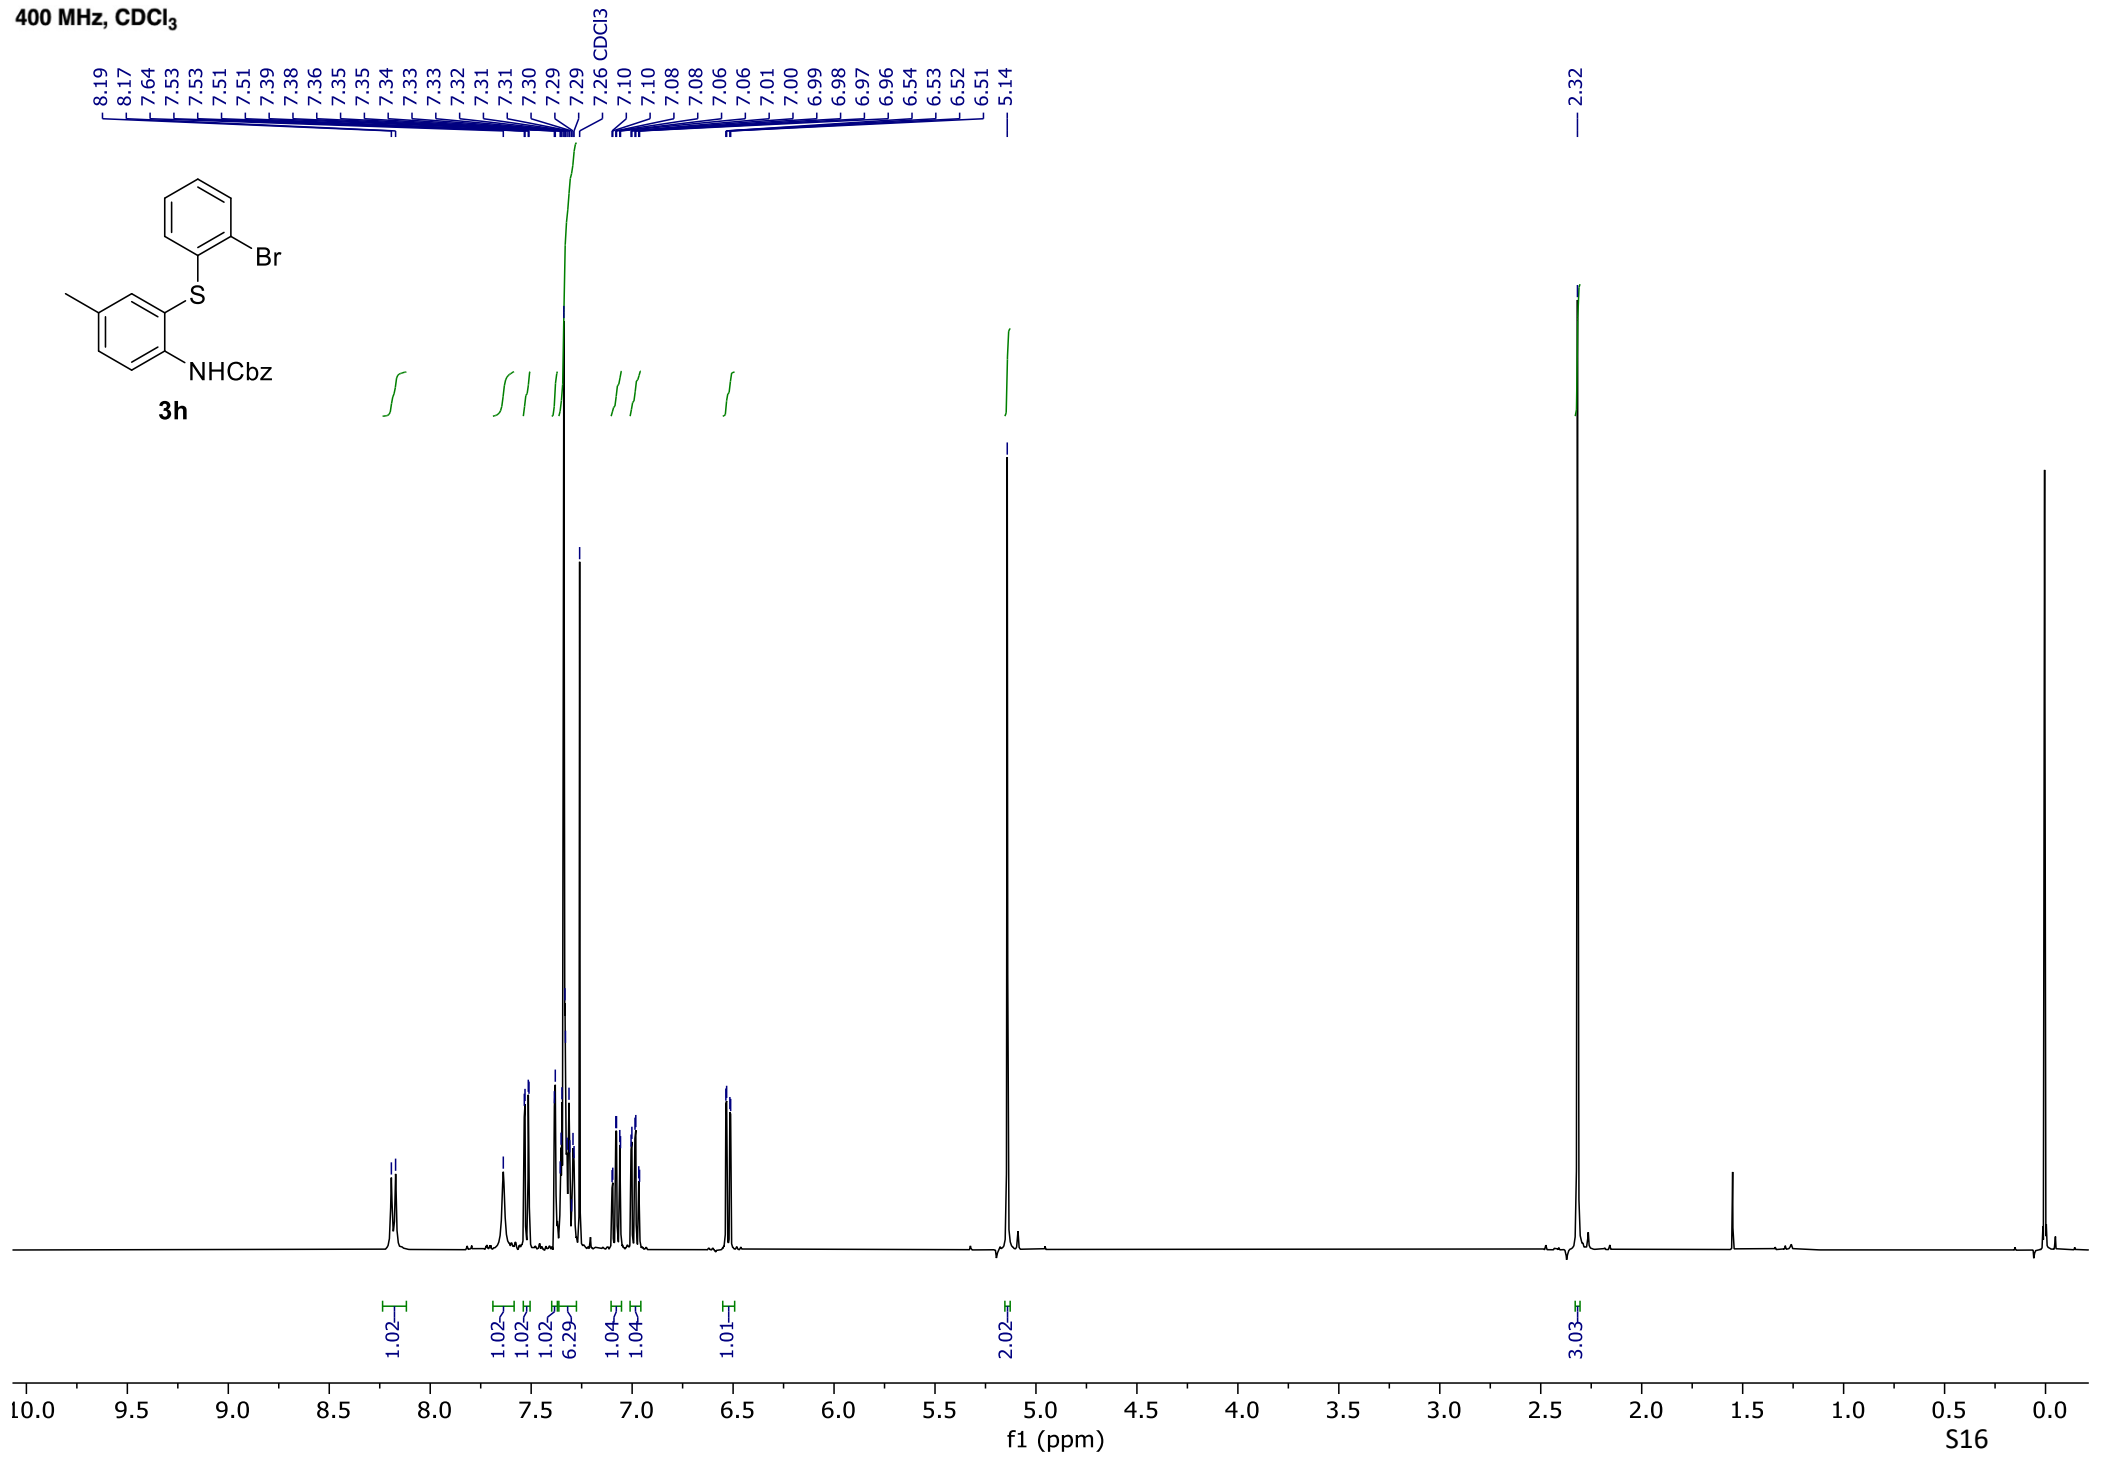



101 MHz, CDCl<sub>3</sub>

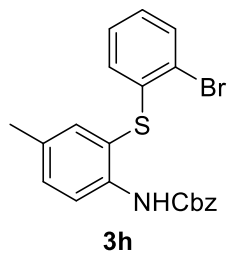

153.37  
138.33  
137.78  
137.60  
136.09  
133.86  
133.07  
132.54  
128.70  
128.41  
128.33  
128.15  
127.02  
126.92  
121.20  
119.61  
118.10

77.16 CDCl<sub>3</sub>

67.13

20.64

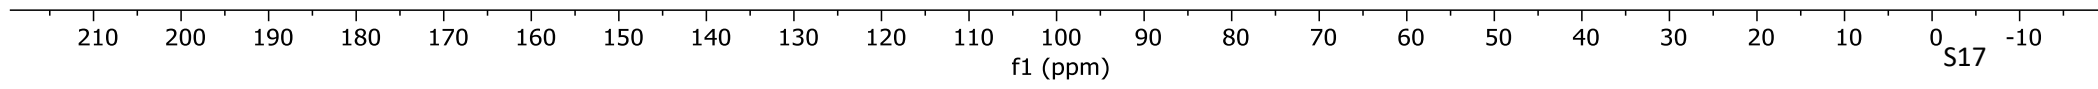

400 MHz, CDCl<sub>3</sub>

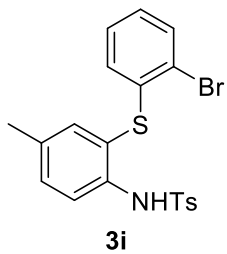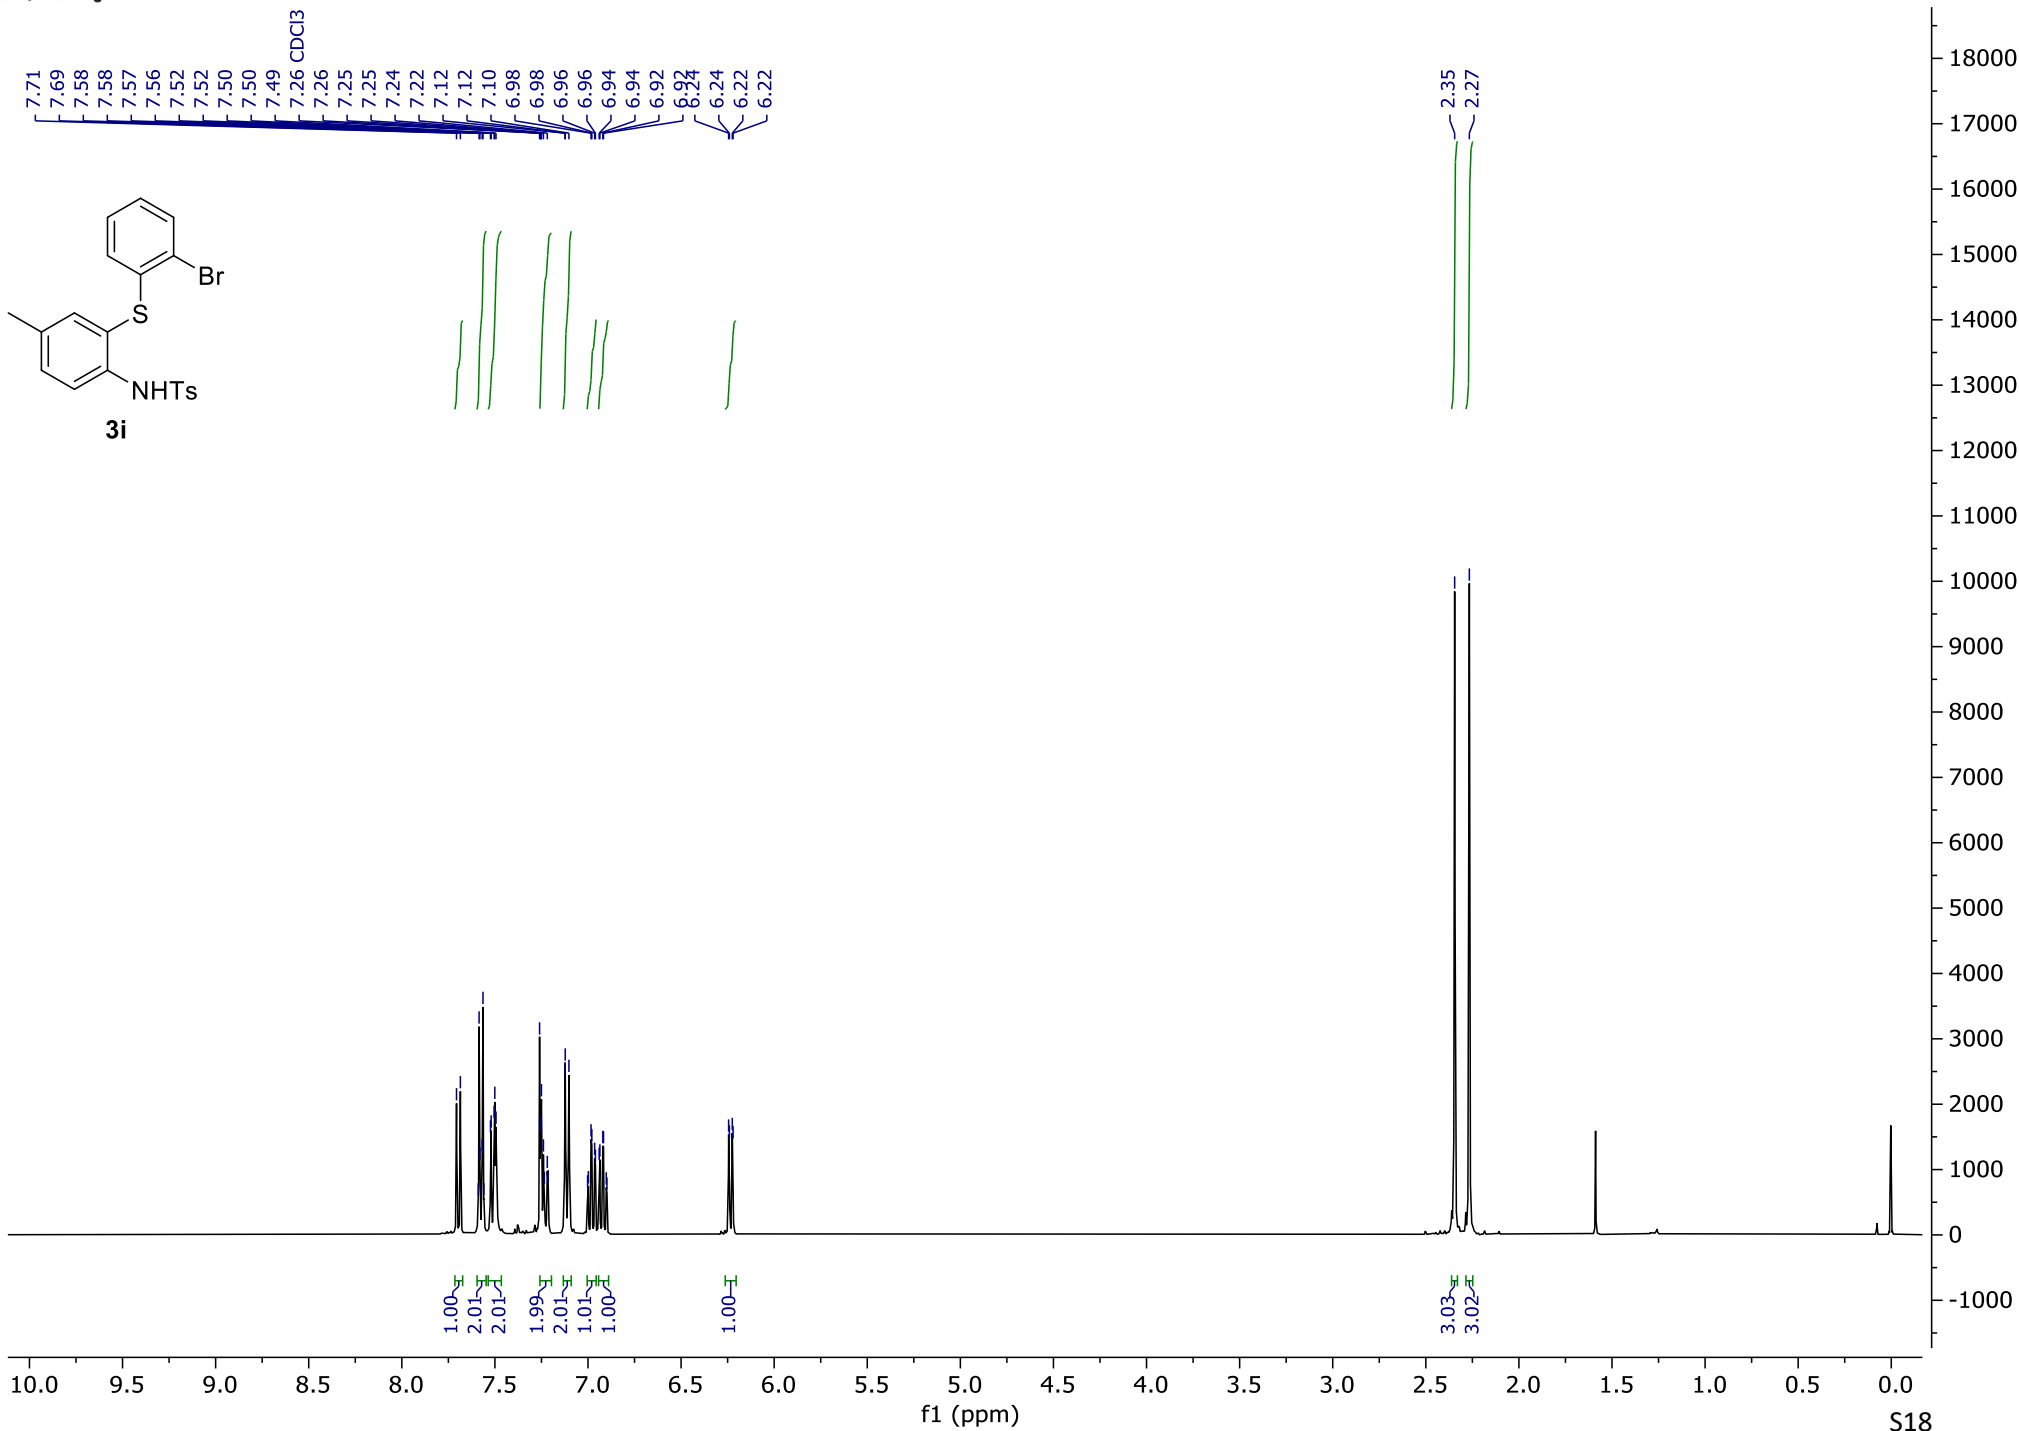

101 MHz, CDCl<sub>3</sub>

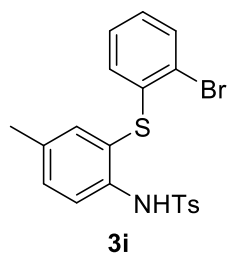

143.99  
137.84  
137.41  
137.26  
136.01  
135.42  
133.11  
132.55  
129.71  
128.07  
127.39  
127.19  
127.15  
127.00  
121.37  
120.43

77.16 CDCl<sub>3</sub>

21.67  
20.65

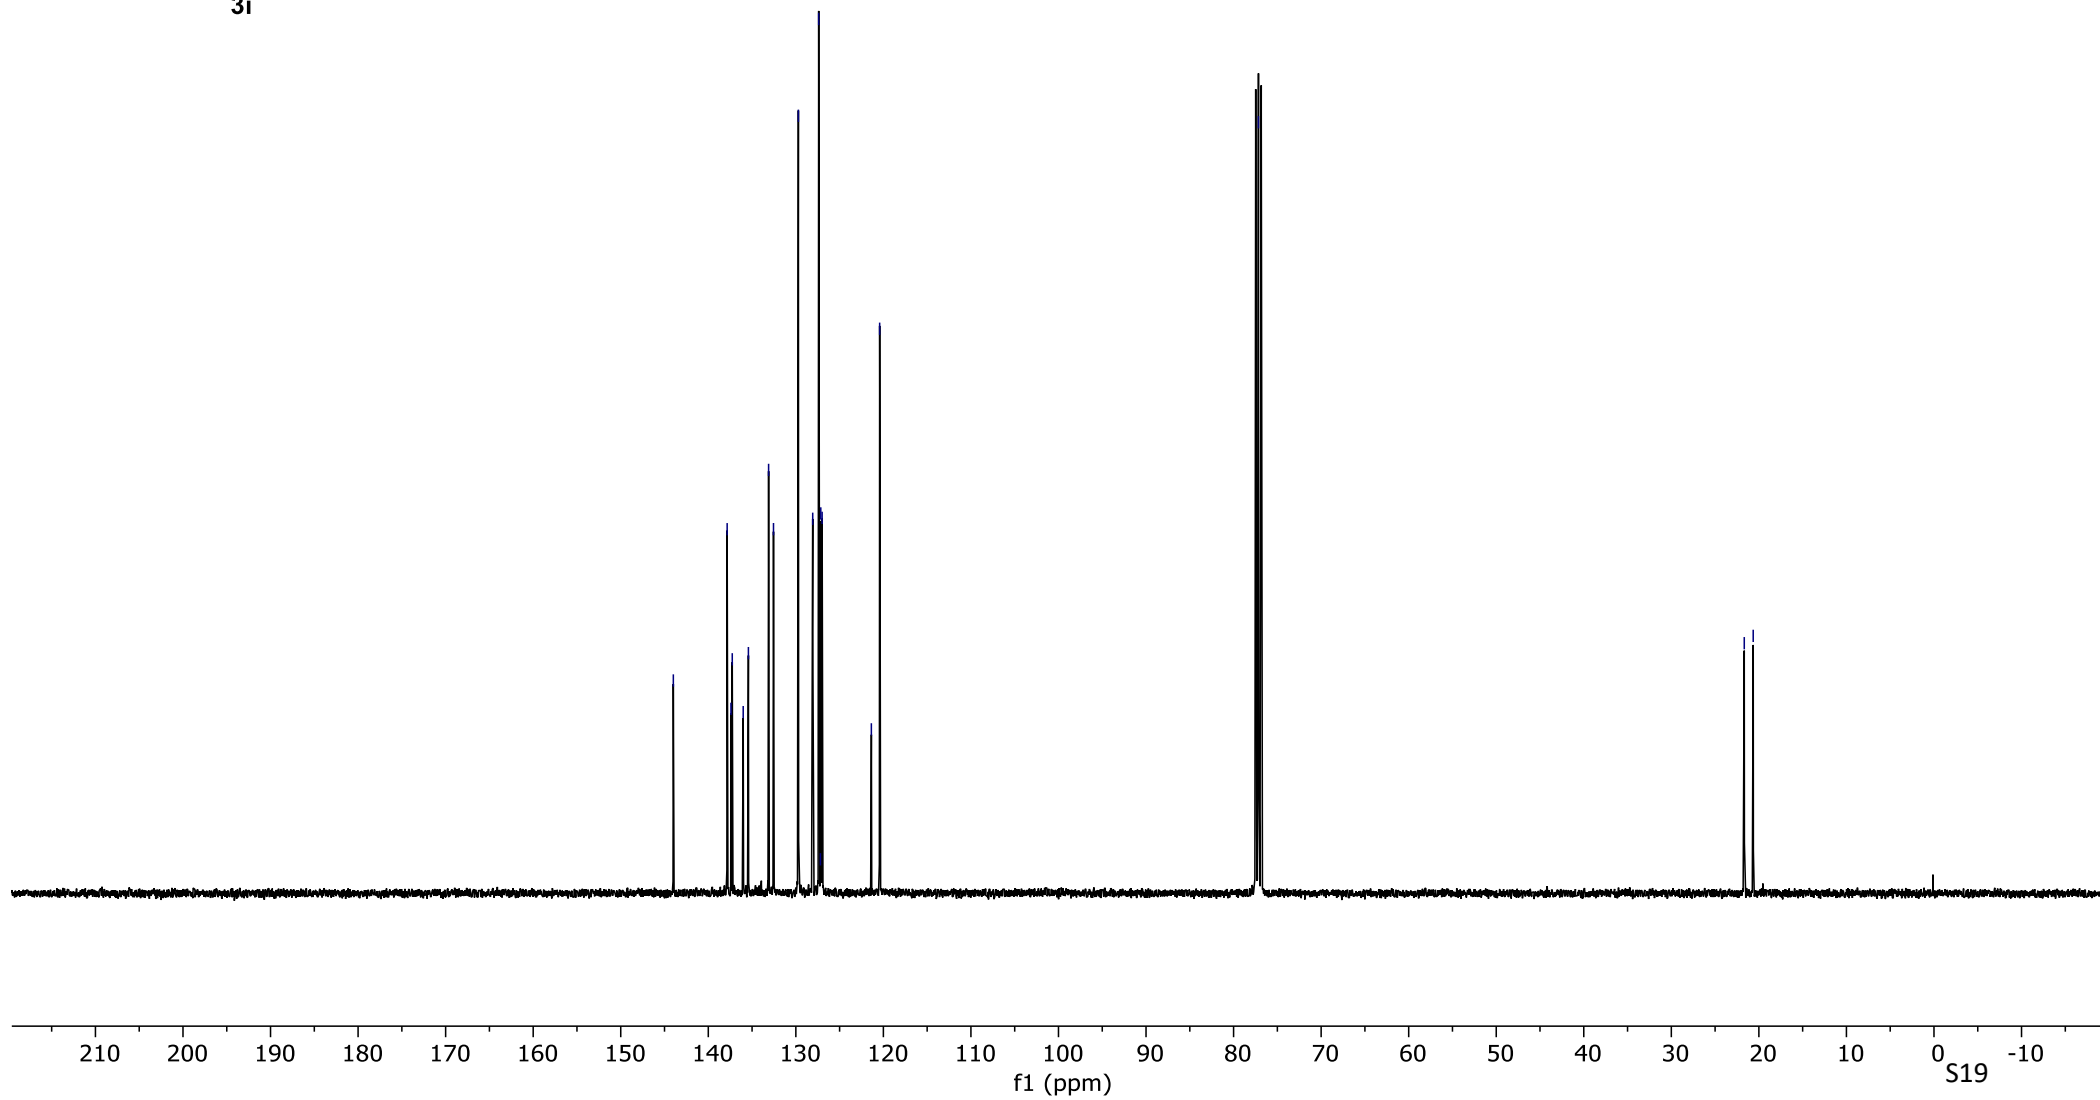

400 MHz, CDCl<sub>3</sub>

7.52  
7.52  
7.50  
7.30  
7.30  
7.26 CDCl<sub>3</sub>  
7.22  
7.20  
7.20  
7.19  
7.10  
7.09  
7.08  
7.08  
7.07  
7.06  
7.06  
6.97  
6.97  
6.95  
6.95  
6.95  
6.93  
6.84  
6.62  
6.57  
6.57  
6.55  
6.55

4.74  
4.74  
4.72  
4.71

2.81  
2.80

2.26

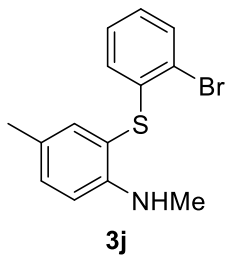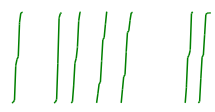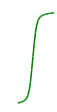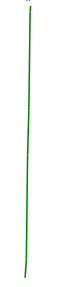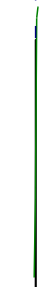

1.00  
1.00  
1.01  
1.00  
1.00

1.01  
1.00

1.00

3.01

3.00

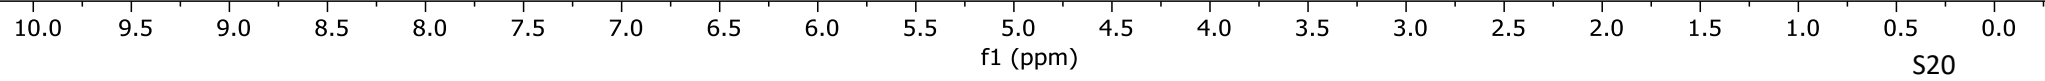

S20

101 MHz, CDCl<sub>3</sub>

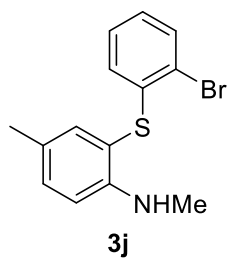

148.92  
138.46  
138.32  
132.92  
132.84  
127.86  
126.40  
126.22  
126.16  
120.69  
112.36  
110.46  
77.16 CDCl<sub>3</sub>  
30.79  
20.23

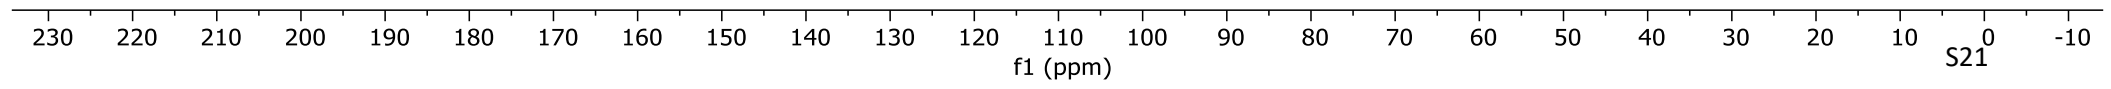

400 MHz, CDCl<sub>3</sub>

7.53  
7.52  
7.51  
7.50  
7.33  
7.32  
7.26  
7.26 CDCl<sub>3</sub>  
7.26  
7.25  
7.25  
7.24  
7.23  
7.22  
7.21  
7.18  
7.18  
7.16  
7.12  
7.11  
7.11  
7.10  
7.10  
7.09  
7.09  
7.00  
7.00  
6.98  
6.98  
6.65  
6.63  
6.63  
6.57  
6.55

5.26  
5.24  
5.23

4.35  
4.34

2.23

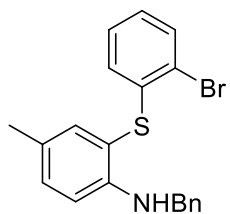

3k

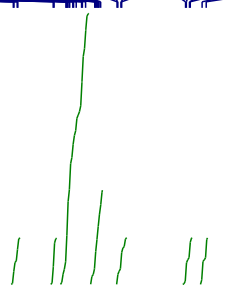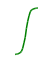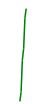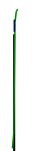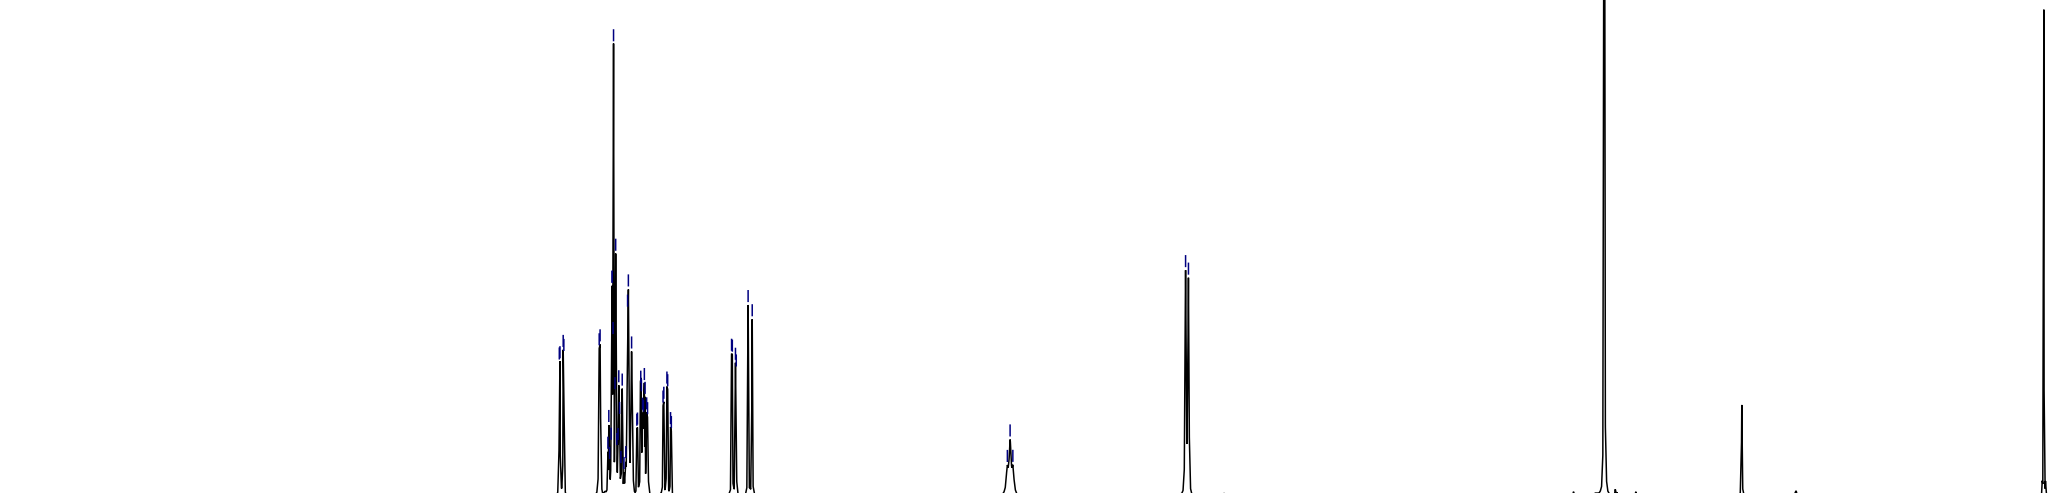

1.01  
1.01  
5.89  
2.05  
1.02

1.02  
1.01

1.01

2.02

3.03

10.0 9.5 9.0 8.5 8.0 7.5 7.0 6.5 6.0 5.5 5.0 4.5 4.0 3.5 3.0 2.5 2.0 1.5 1.0 0.5 0.0

f1 (ppm)

S22

101 MHz, CDCl<sub>3</sub>

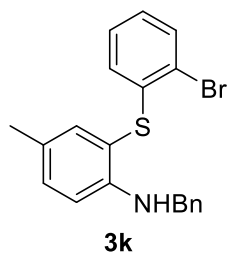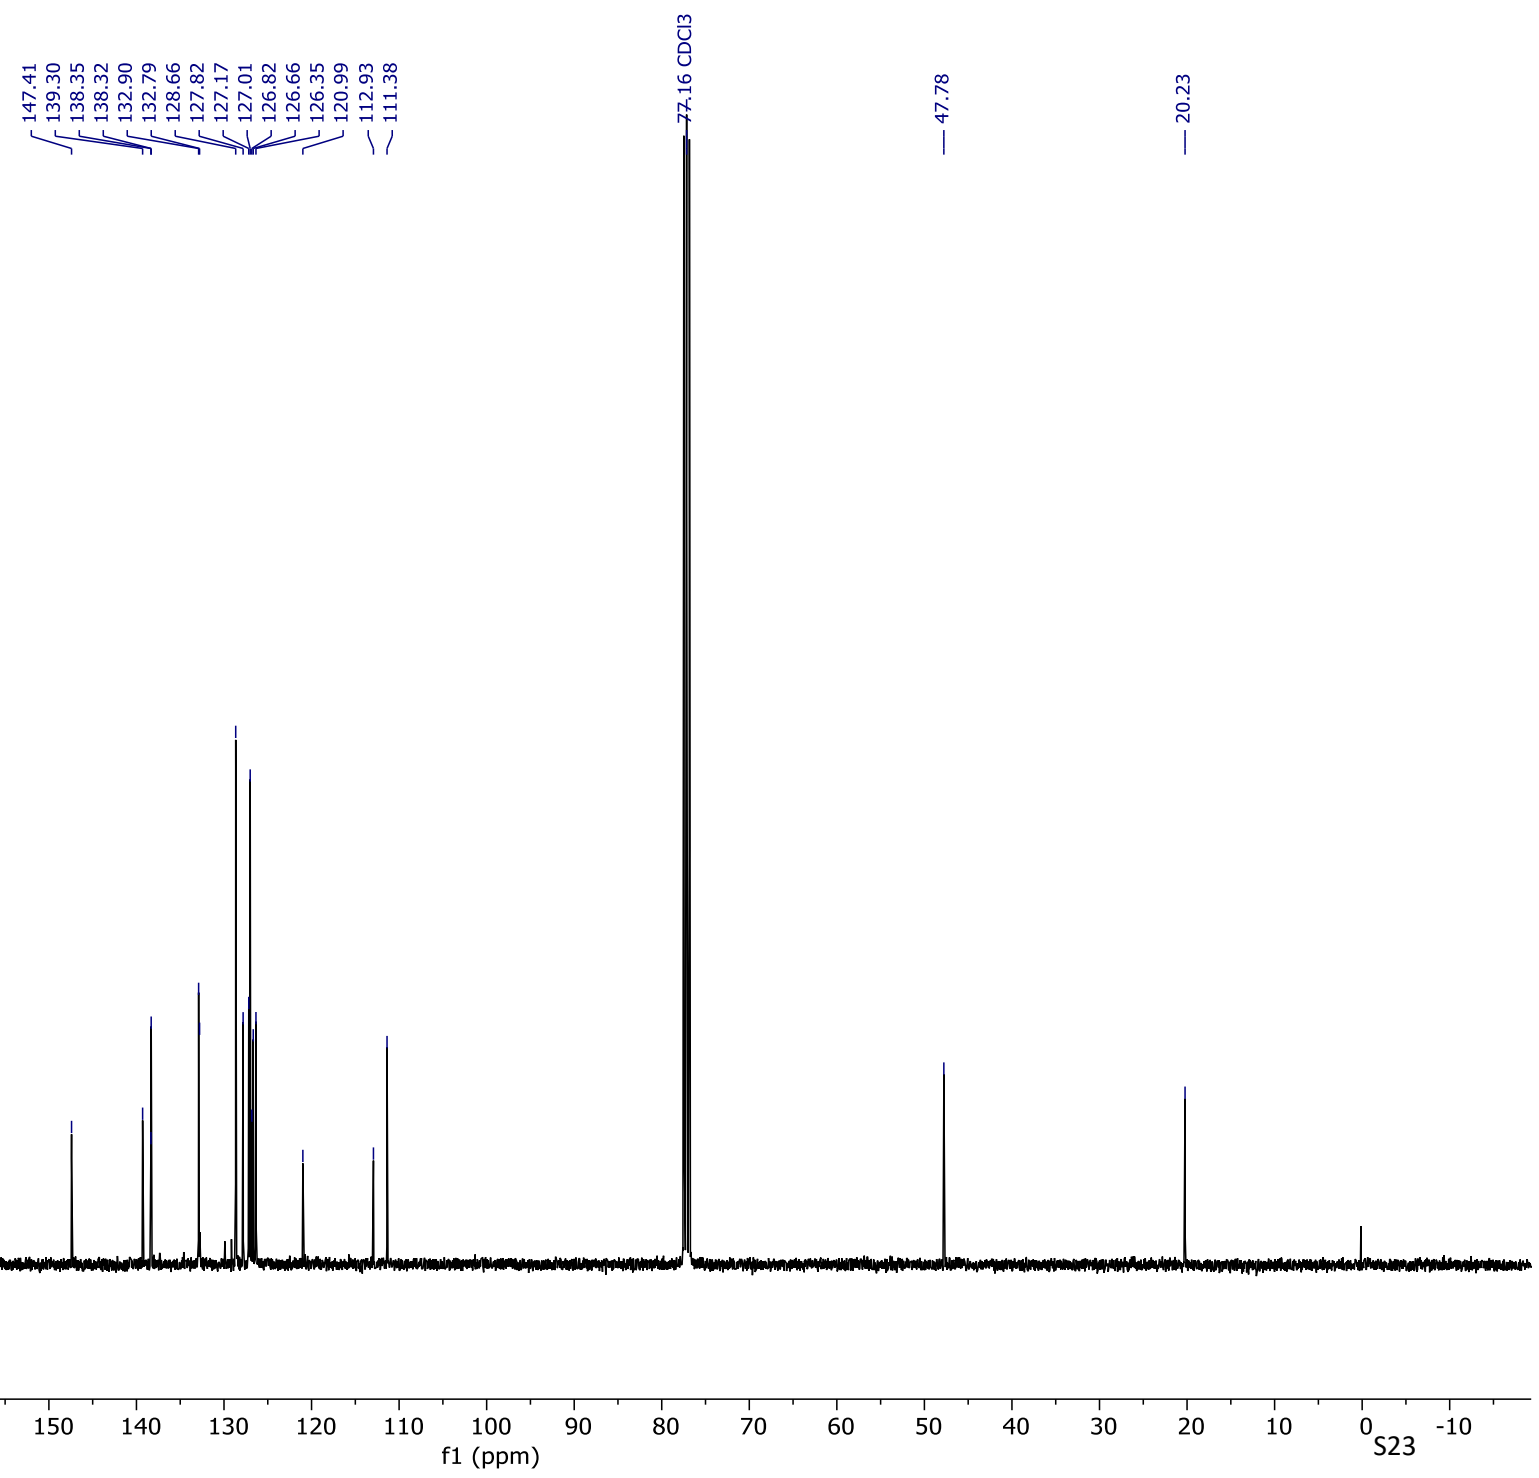

400 MHz, CDCl<sub>3</sub>

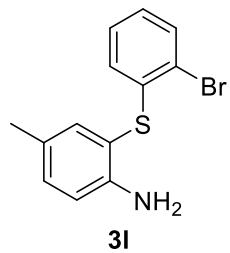

7.53  
7.53  
7.51  
7.51  
7.29  
7.26 CDCl<sub>3</sub>  
7.12  
7.12  
7.12  
7.12  
7.11  
7.10  
7.10  
7.10  
7.10  
7.10  
7.09  
7.08  
6.99  
6.98  
6.97  
6.96  
6.96  
6.95  
6.94  
6.76  
6.74  
6.64  
6.64  
6.62  
6.62

4.16

2.26

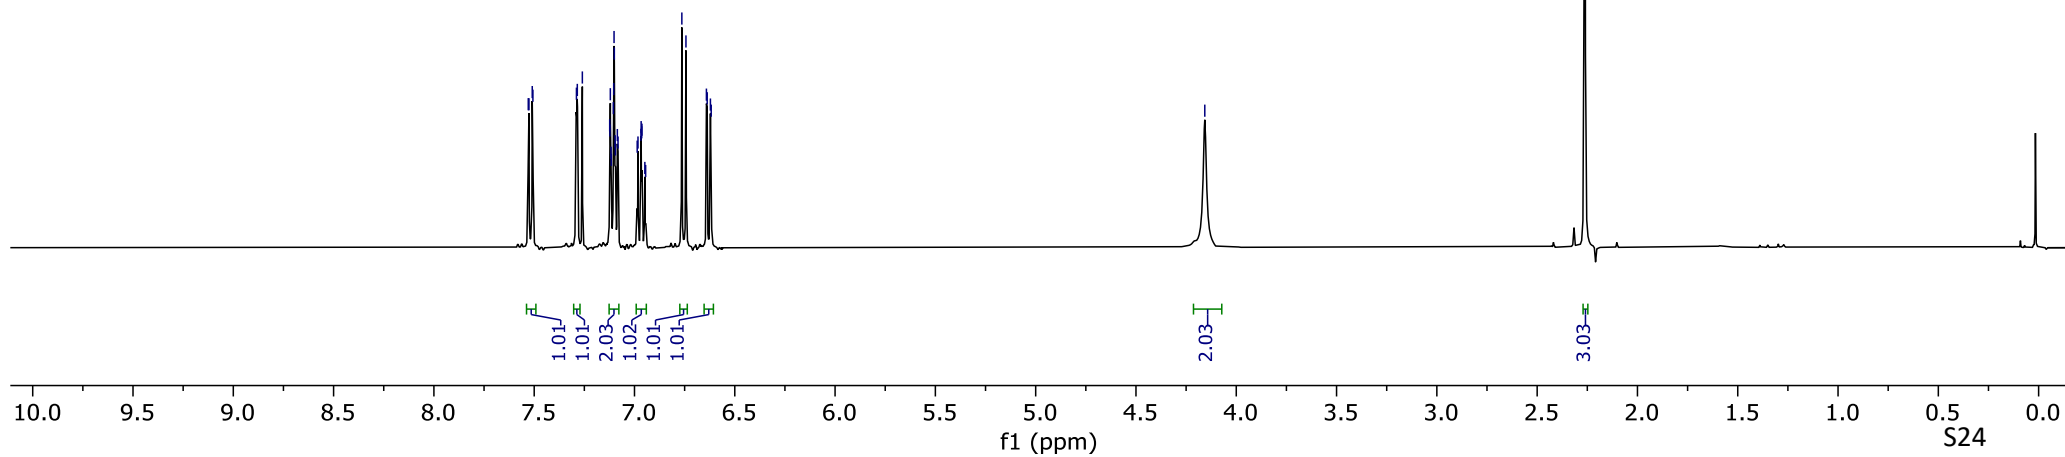



101 MHz, CDCl<sub>3</sub>

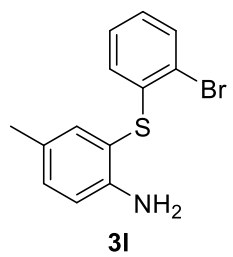

146.91  
138.30  
137.96  
132.88  
132.70  
128.51  
127.86  
126.39  
126.25  
120.75  
115.73  
113.16

77.16 CDCl<sub>3</sub>

20.32

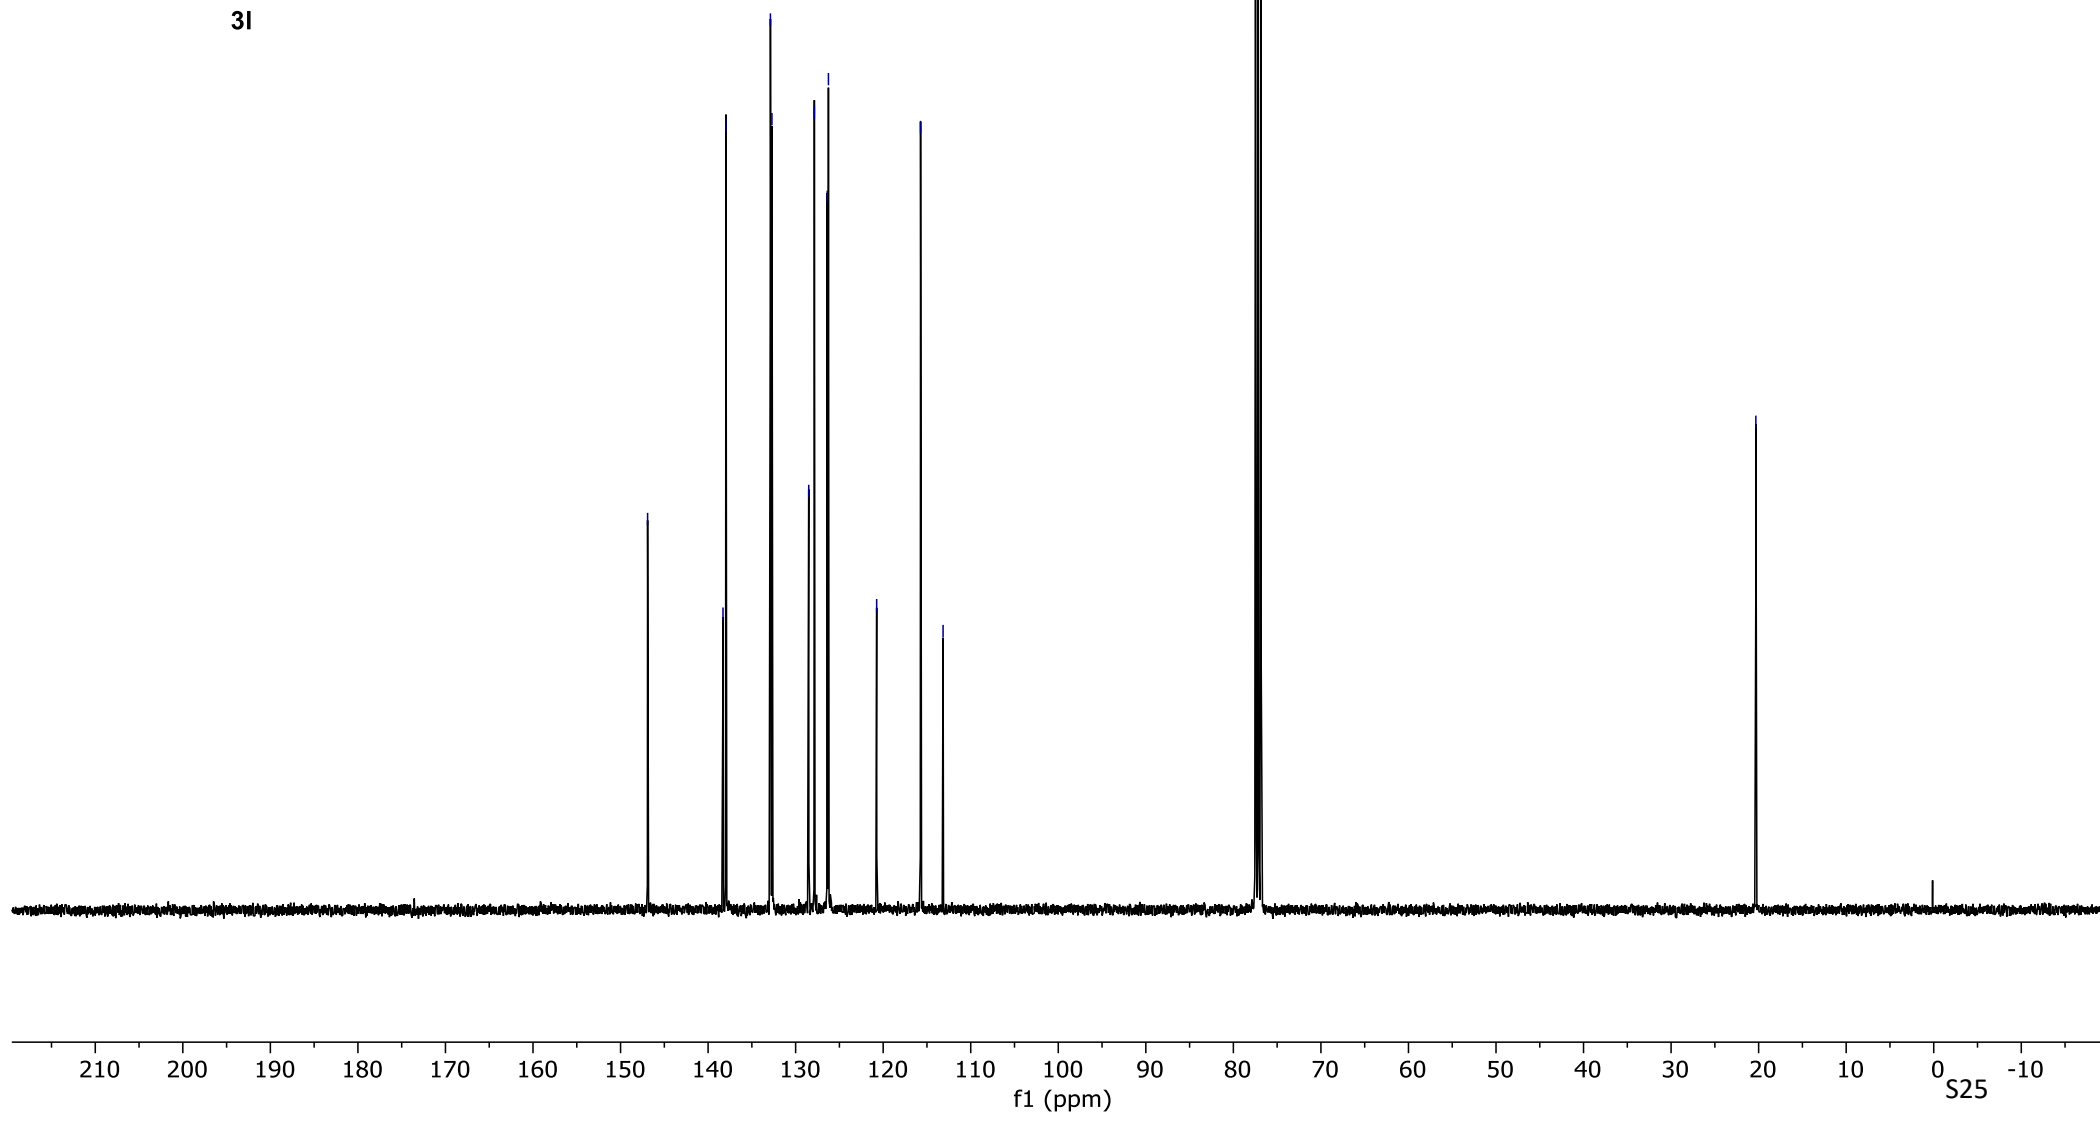

400 MHz, CDCl<sub>3</sub>

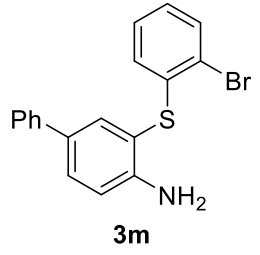

7.78  
7.77  
7.59  
7.58  
7.57  
7.57  
7.56  
7.56  
7.55  
7.55  
7.54  
7.53  
7.44  
7.43  
7.43  
7.42  
7.40  
7.40  
7.39  
7.32  
7.32  
7.31  
7.30  
7.30  
7.29  
7.28  
7.28  
7.26 CDCl<sub>3</sub>  
7.14  
7.14  
7.12  
7.12  
7.12  
7.12  
7.10  
7.01  
7.01  
6.99  
6.99  
6.99  
6.97  
6.97  
6.92  
6.89  
6.73  
6.71  
6.71  
4.37

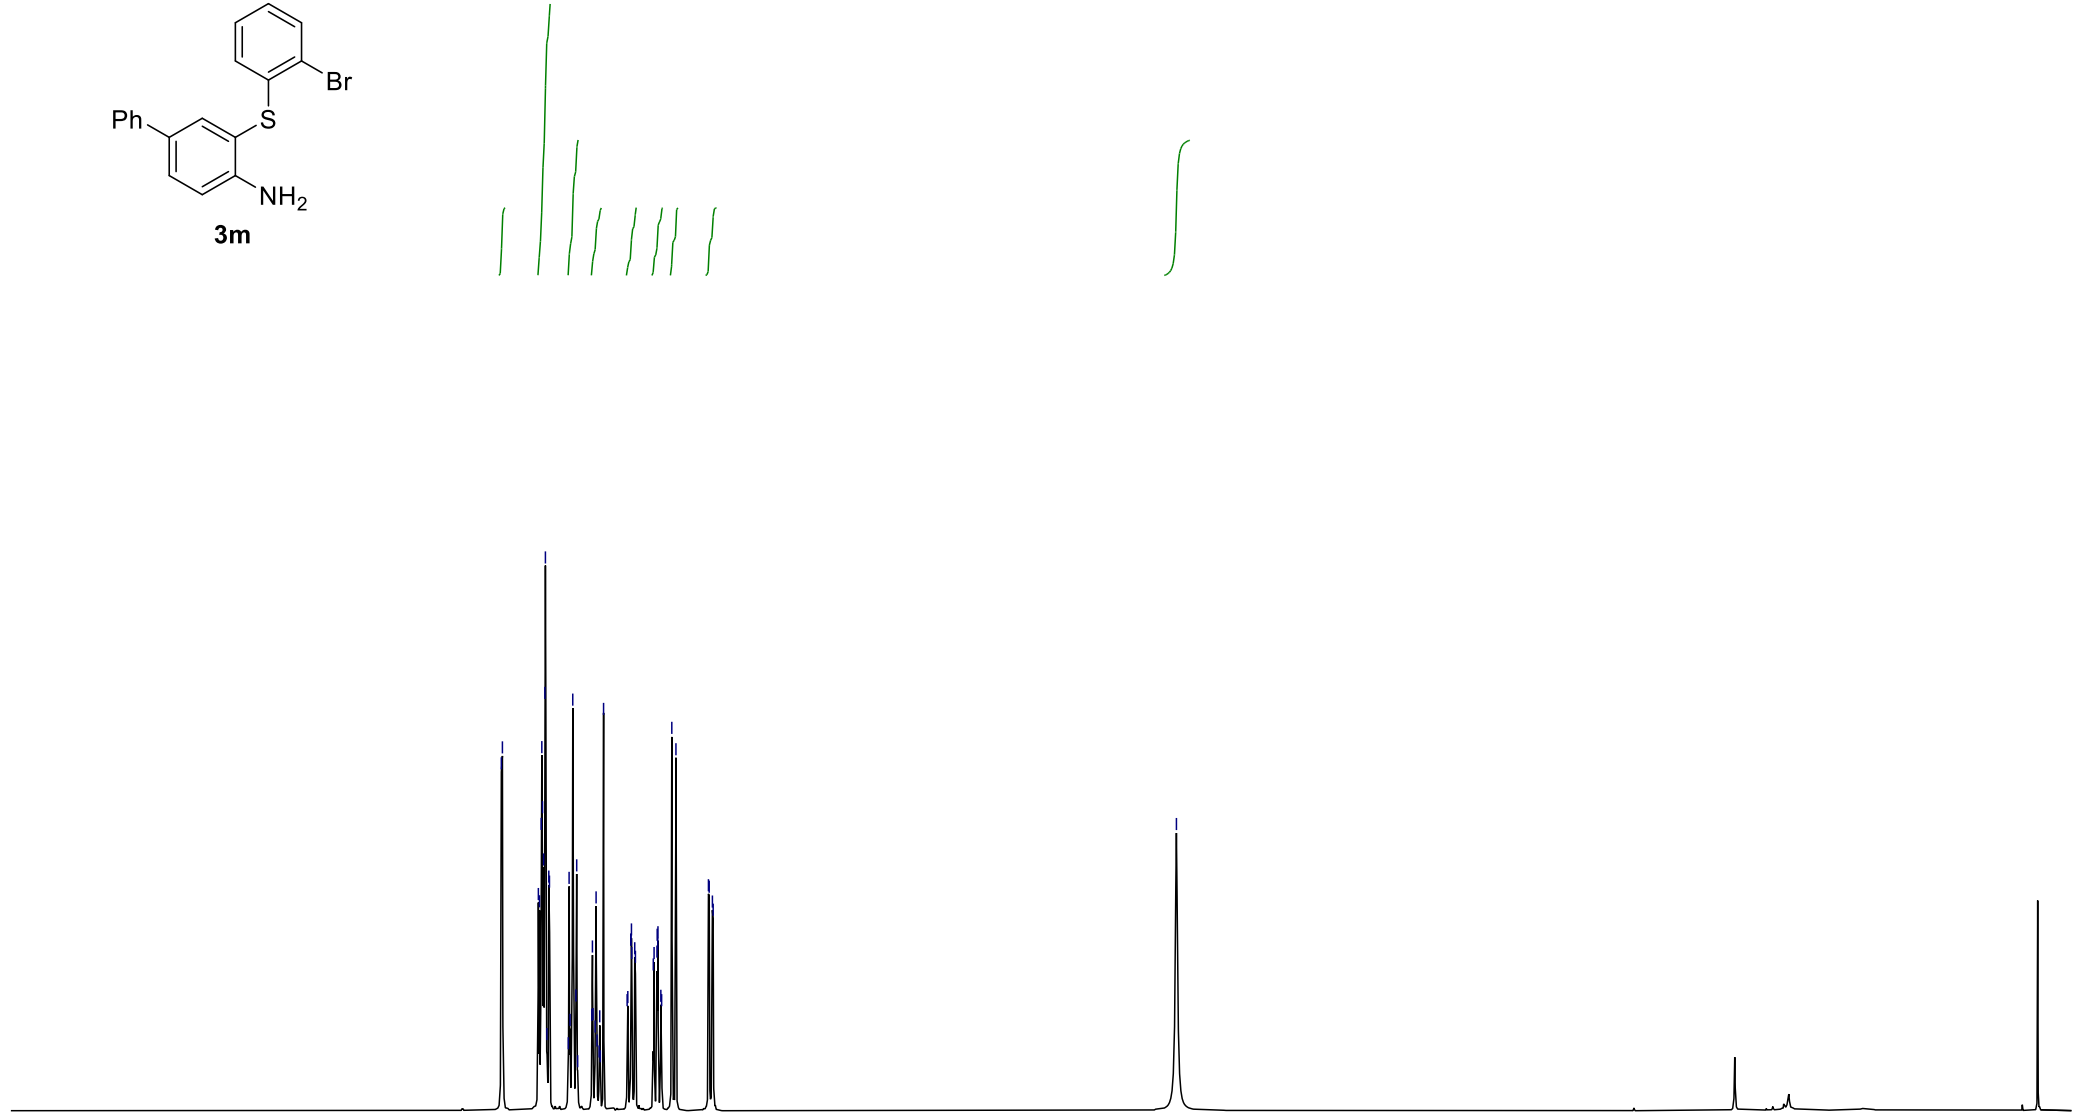

1.00  
4.02  
2.01  
1.00  
1.01  
1.00  
1.00  
1.00  
2.00

10.0 9.5 9.0 8.5 8.0 7.5 7.0 6.5 6.0 5.5 5.0 4.5 4.0 3.5 3.0 2.5 2.0 1.5 1.0 0.5 0.0

f1 (ppm)

S26

101 MHz, CDCl<sub>3</sub>

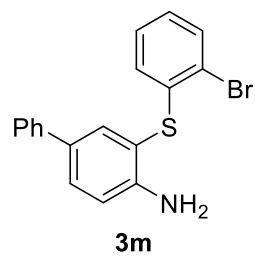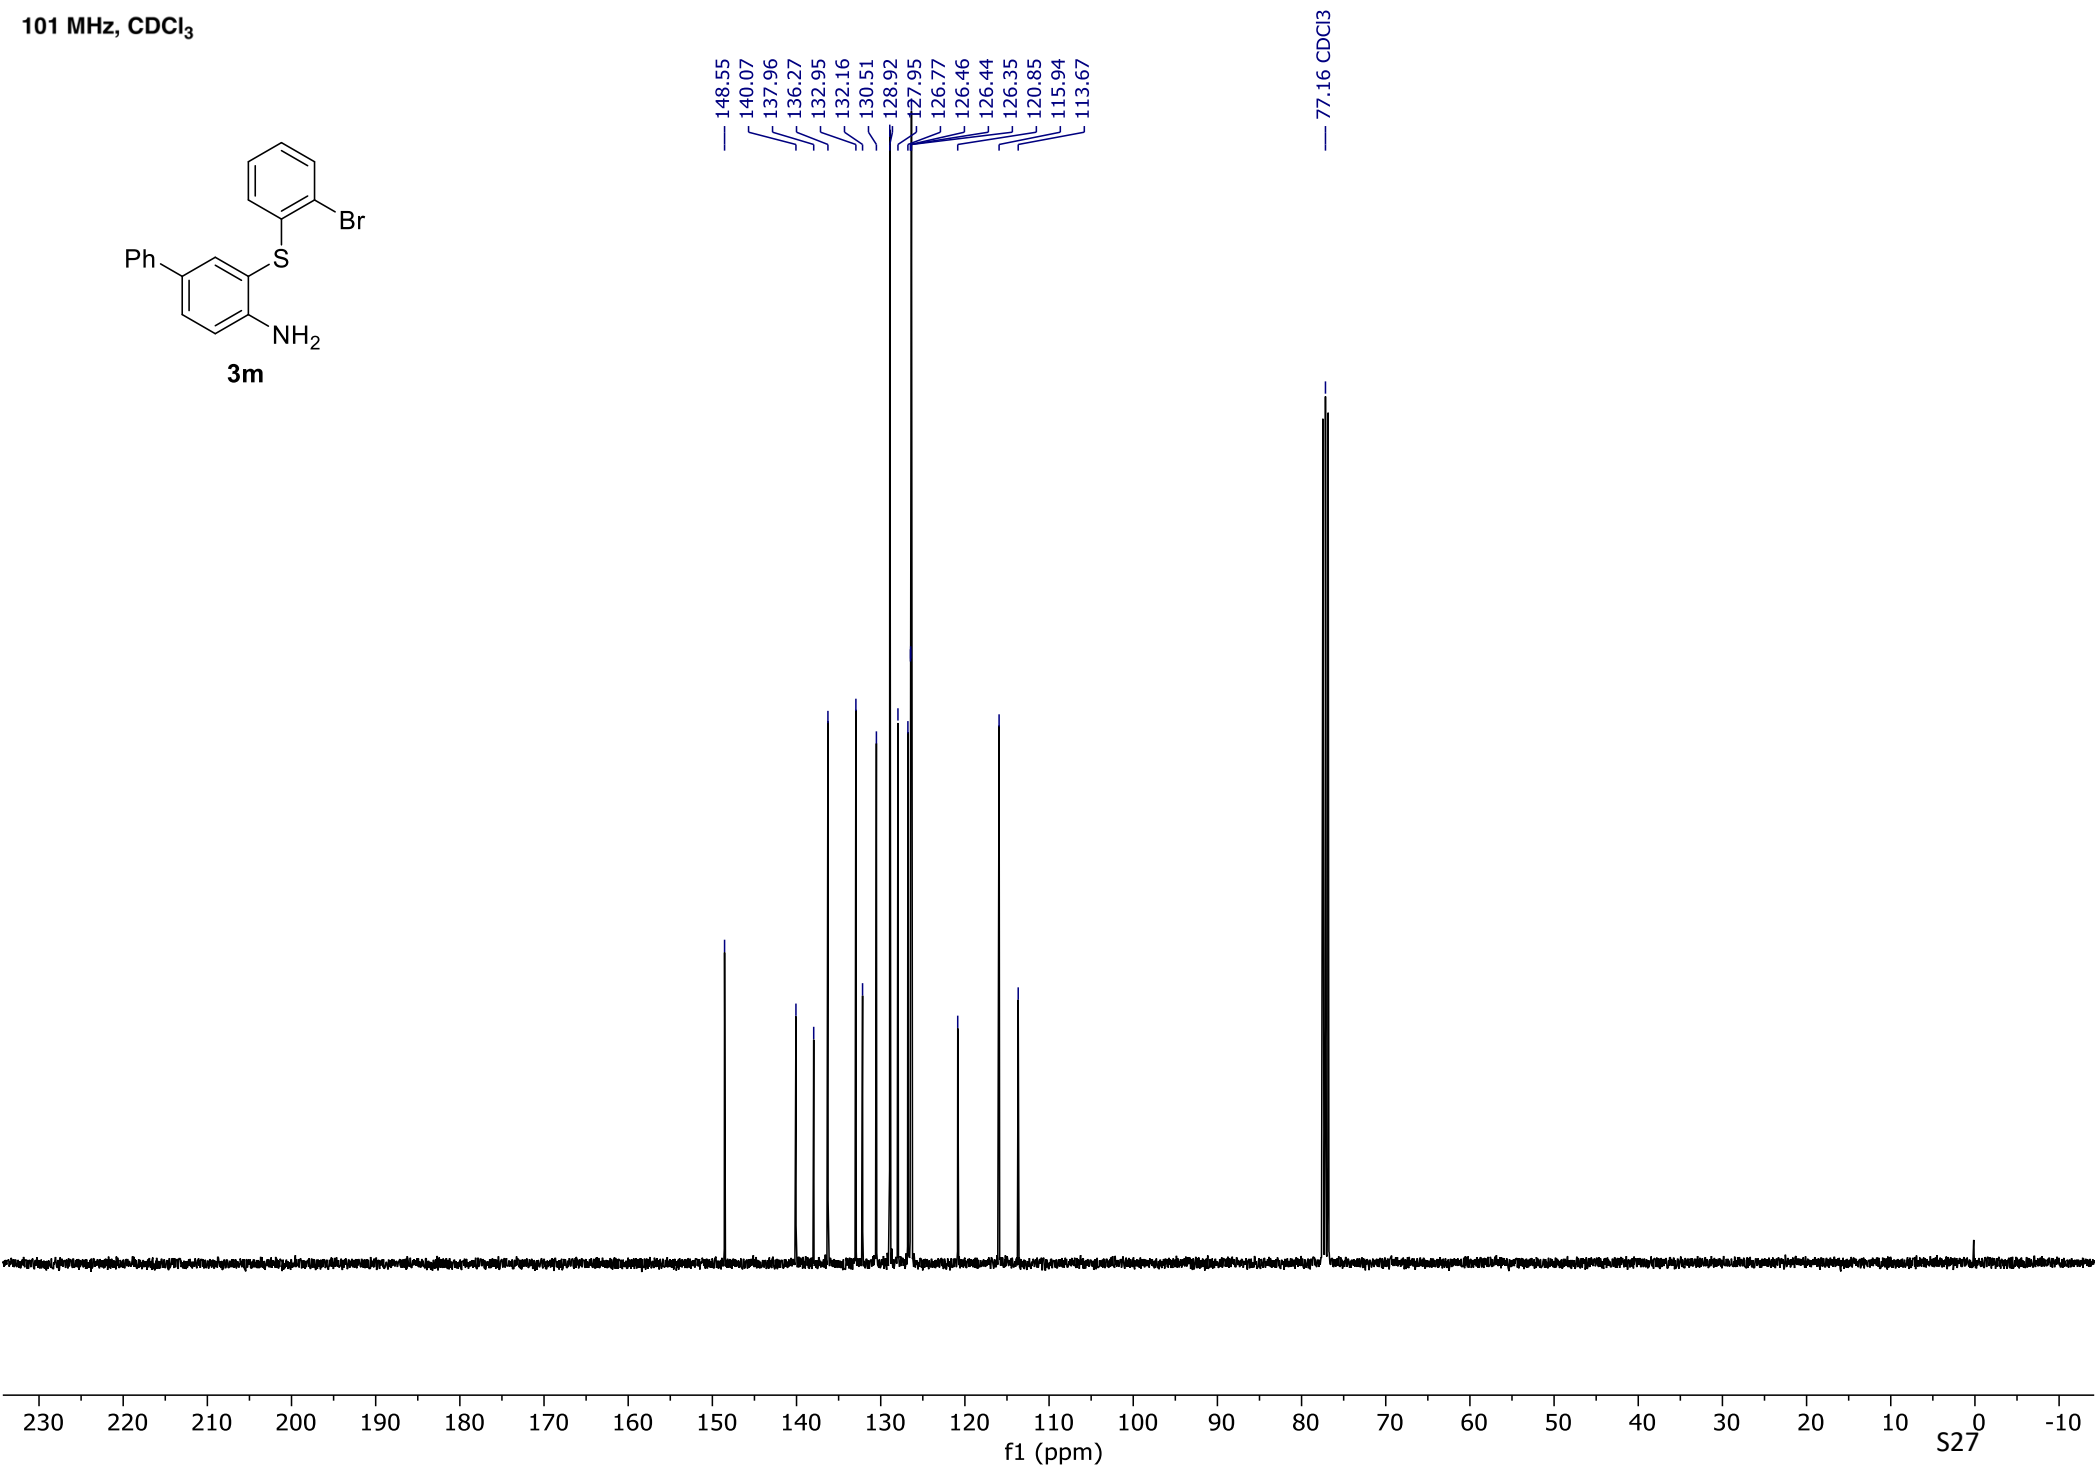

400 MHz, CDCl<sub>3</sub>

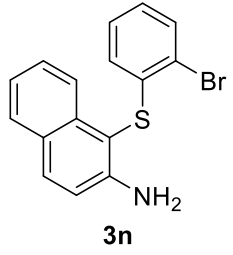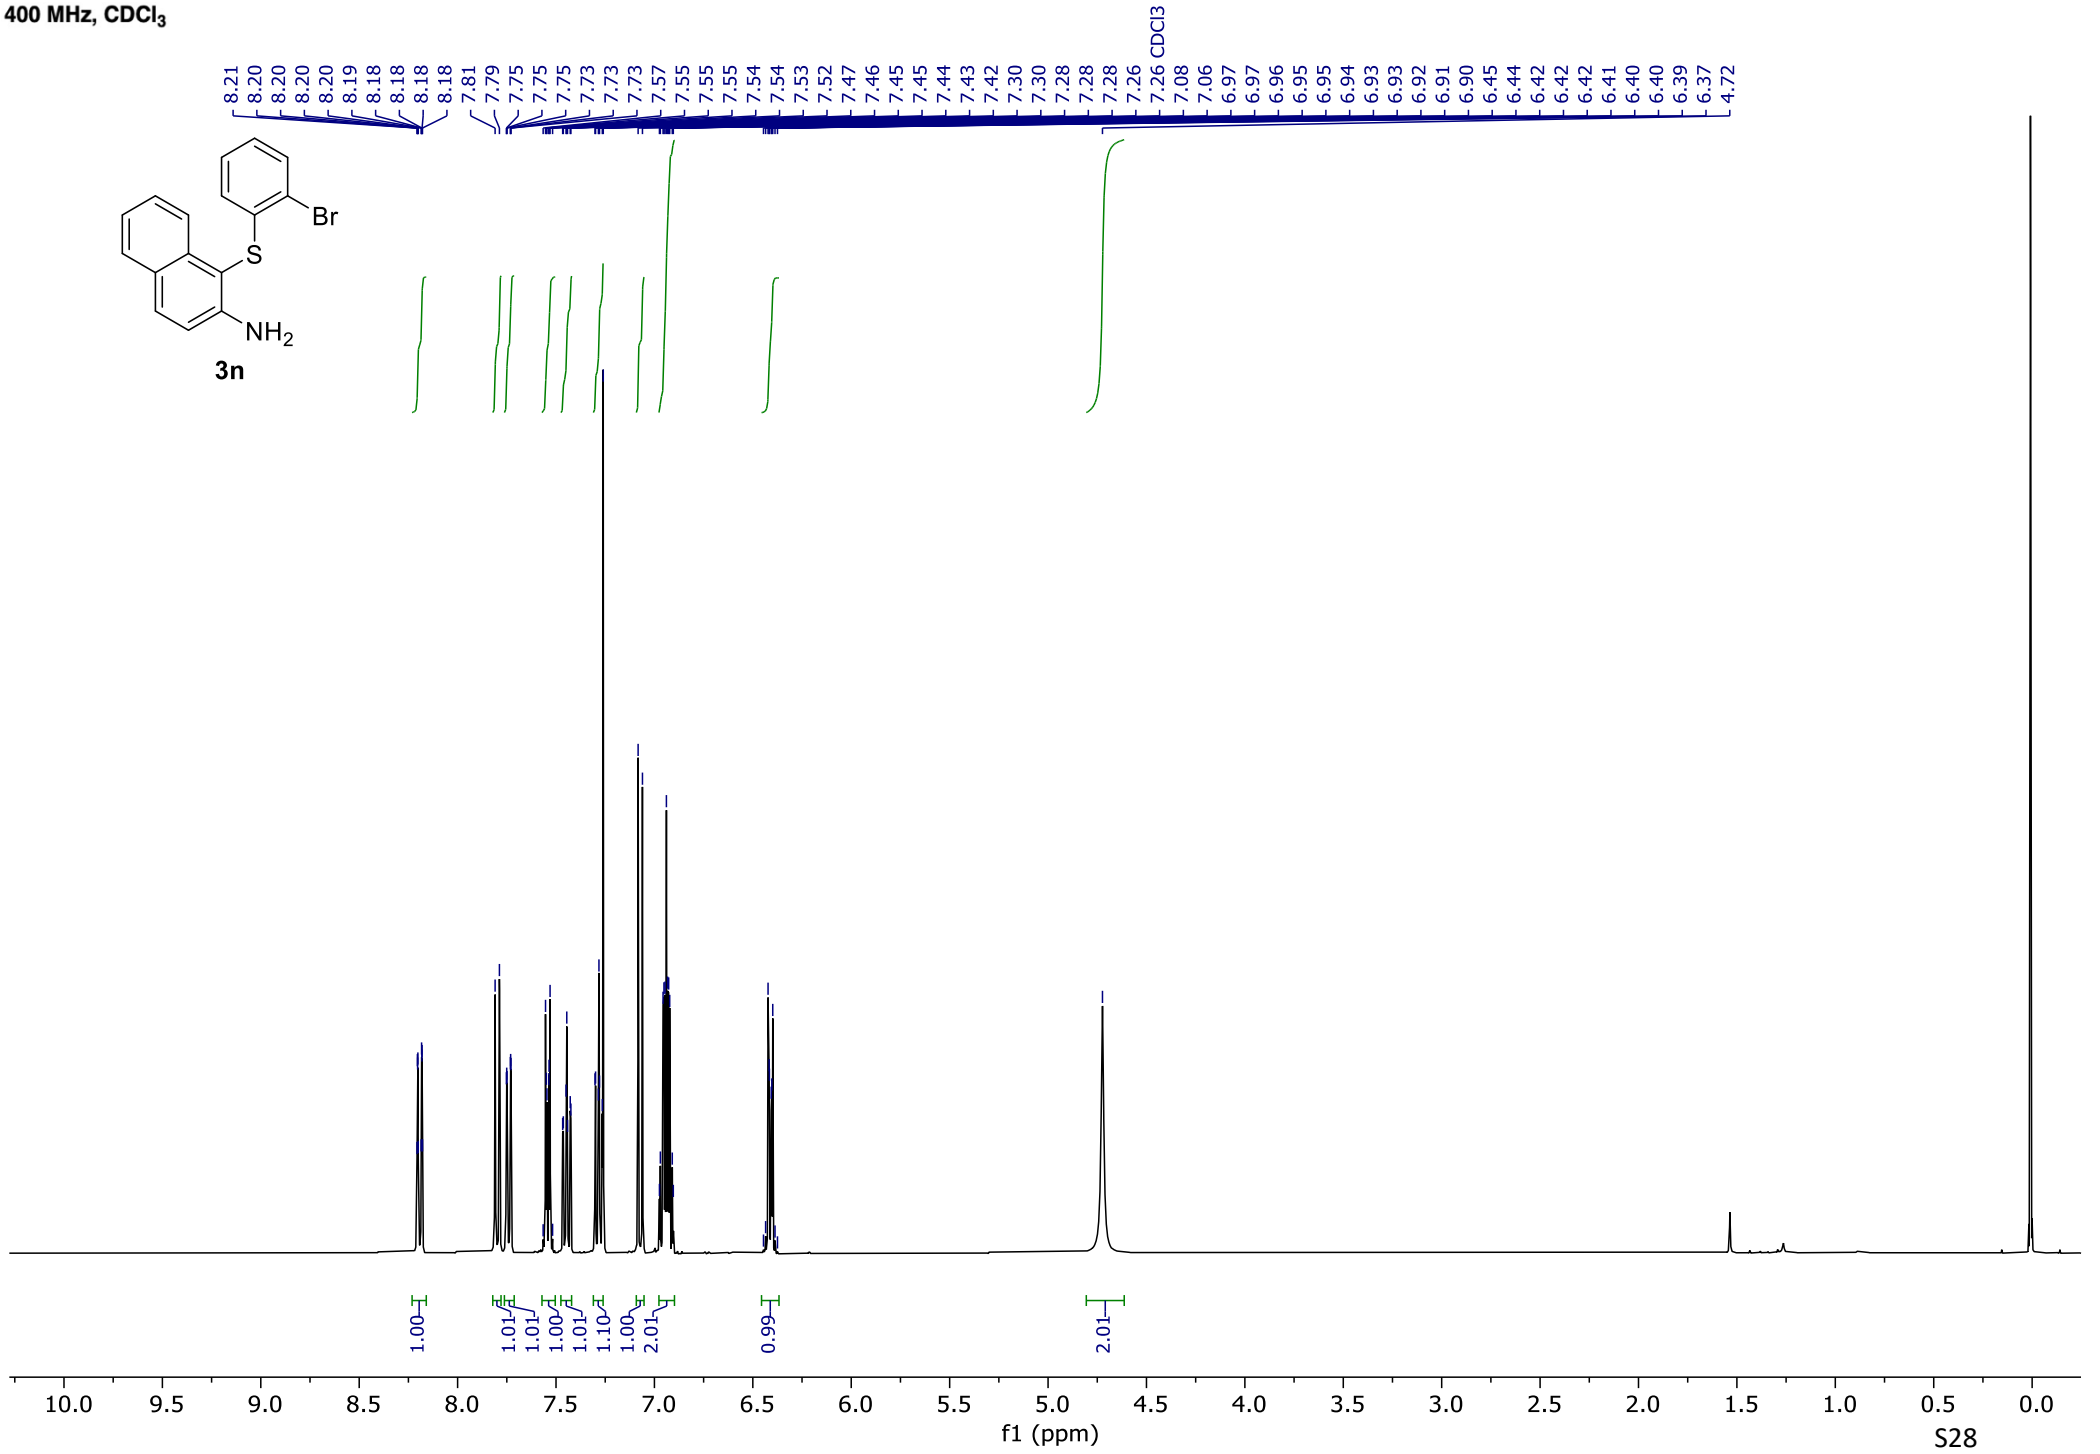

101 MHz, CDCl<sub>3</sub>

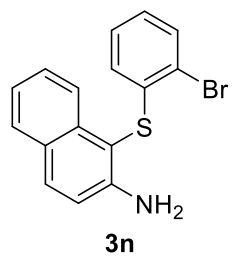

148.84  
137.70  
136.58  
132.93  
132.39  
128.56  
128.55  
128.13  
127.89  
126.15  
126.05  
124.11  
122.88  
121.09  
117.79  
103.70

77.16 CDCl<sub>3</sub>

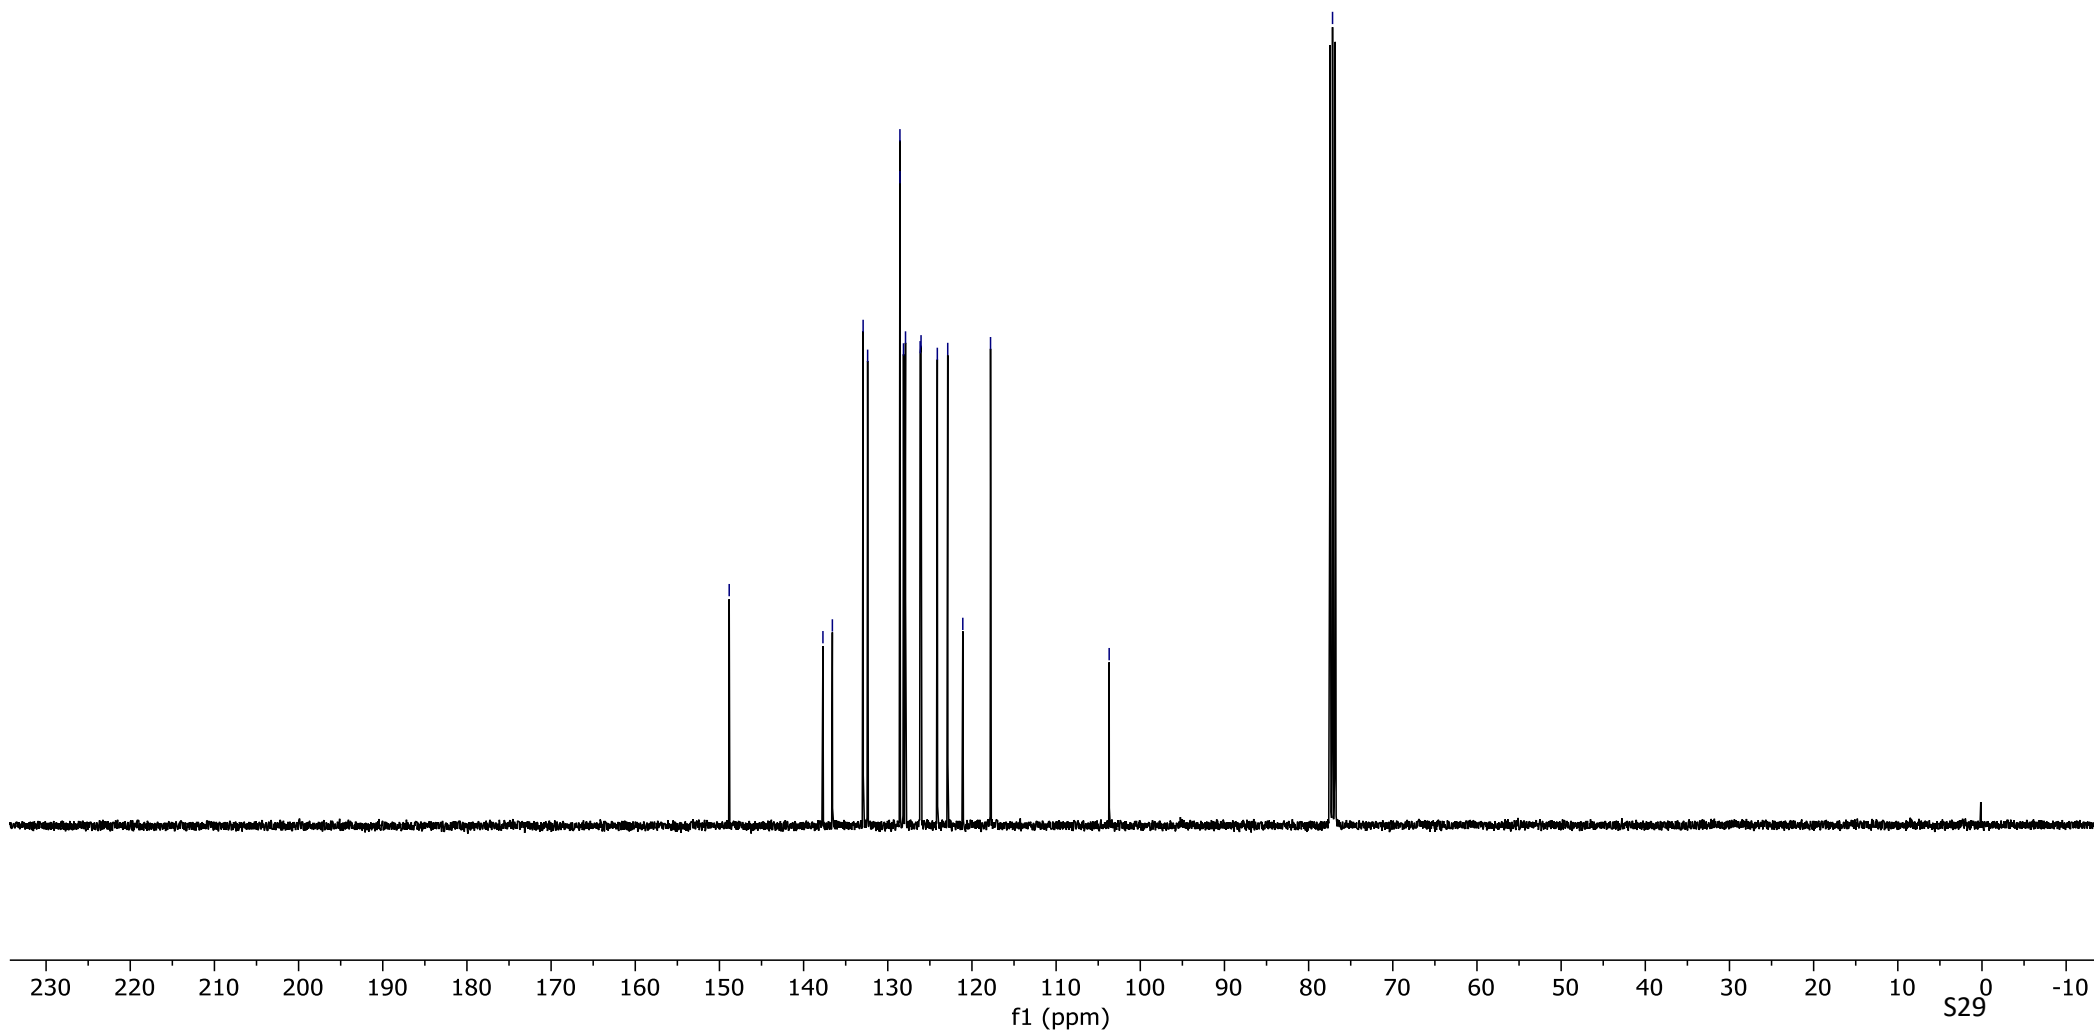

400 MHz, CDCl<sub>3</sub>

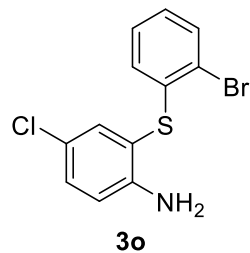

7.54  
7.54  
7.52  
7.52  
7.45  
7.45  
7.26 CDCl<sub>3</sub>  
7.25  
7.24  
7.23  
7.22  
7.15  
7.15  
7.13  
7.13  
7.11  
7.11  
7.02  
7.02  
7.00  
7.00  
6.98  
6.98  
6.76  
6.74  
6.67  
6.66  
6.65  
6.64

4.30

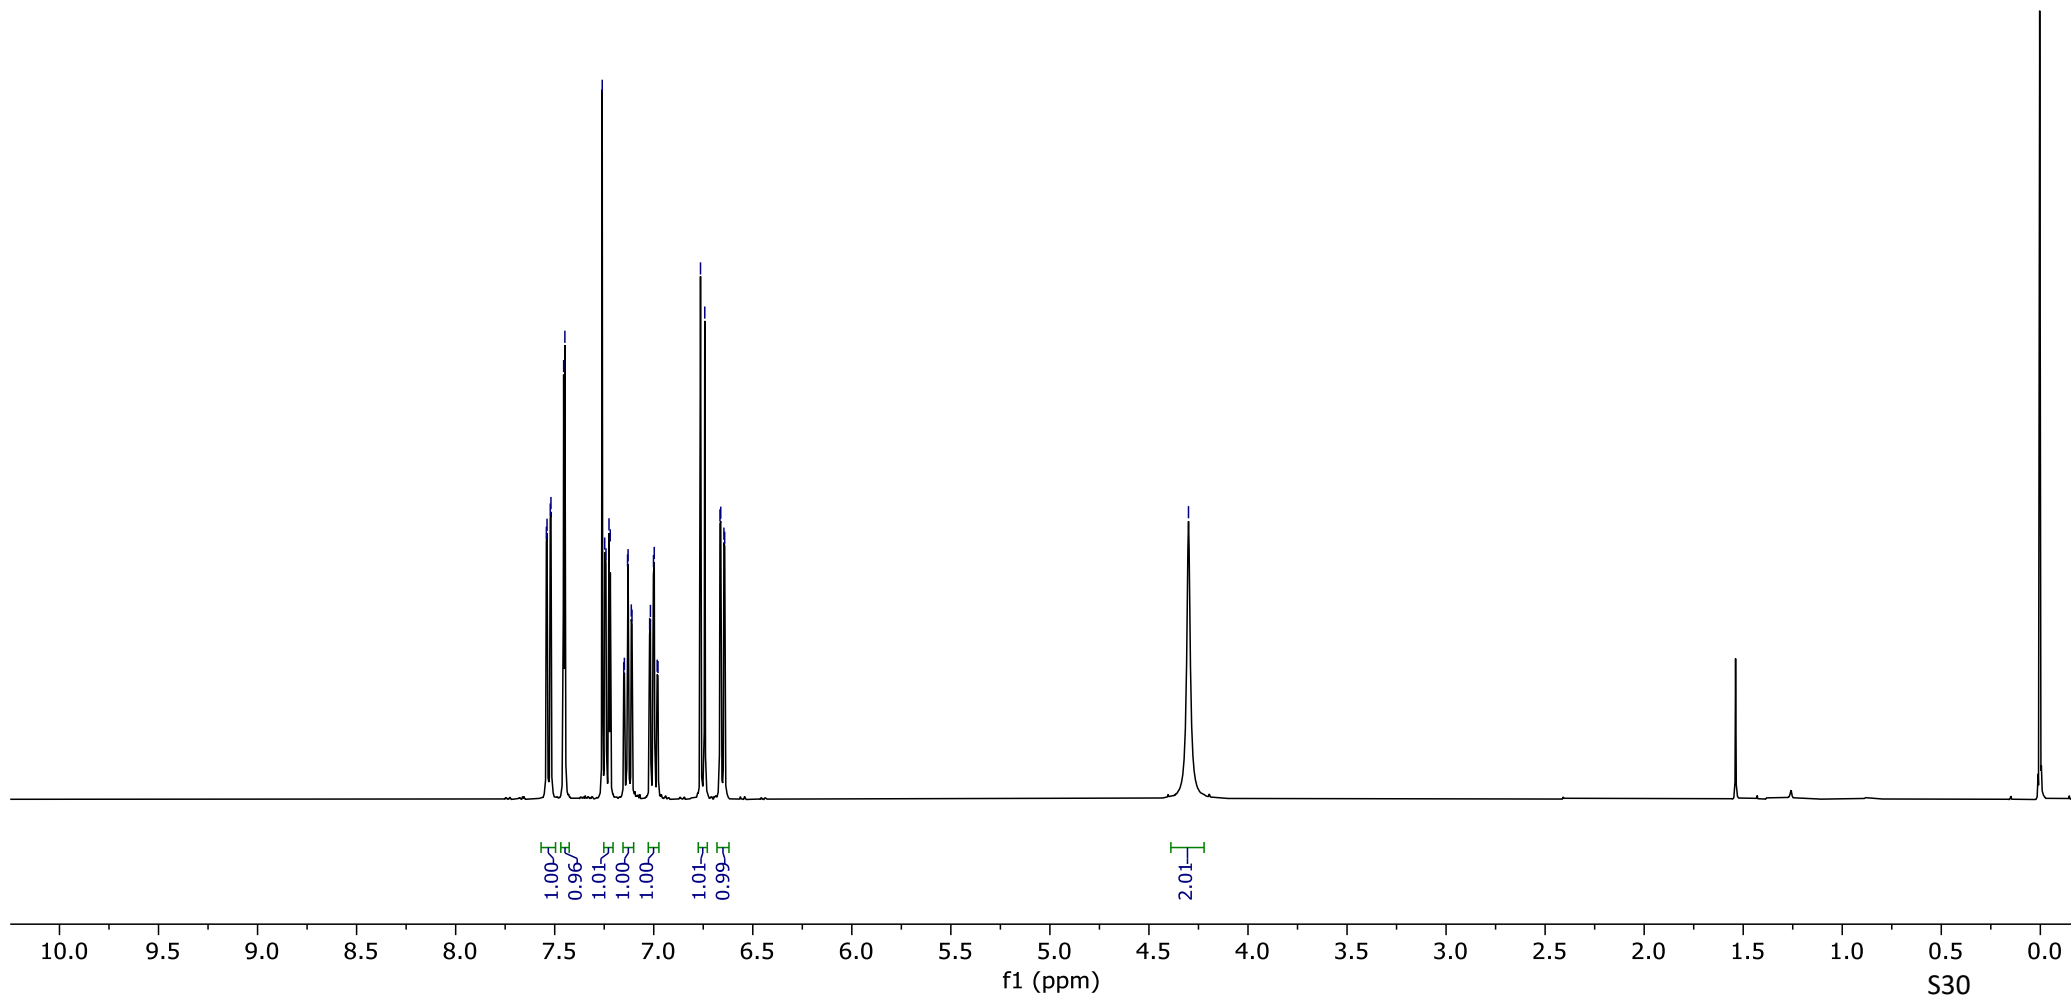

101 MHz, CDCl<sub>3</sub>

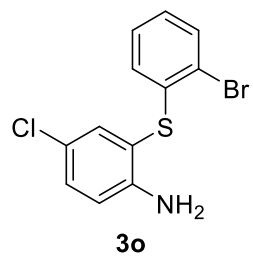

— 147.85  
— 137.17  
— 136.79  
— 133.07  
— 131.80  
— 128.02  
— 126.80  
— 126.64  
— 122.84  
— 121.12  
— 116.52  
— 114.70  
— 77.16 CDCl<sub>3</sub>

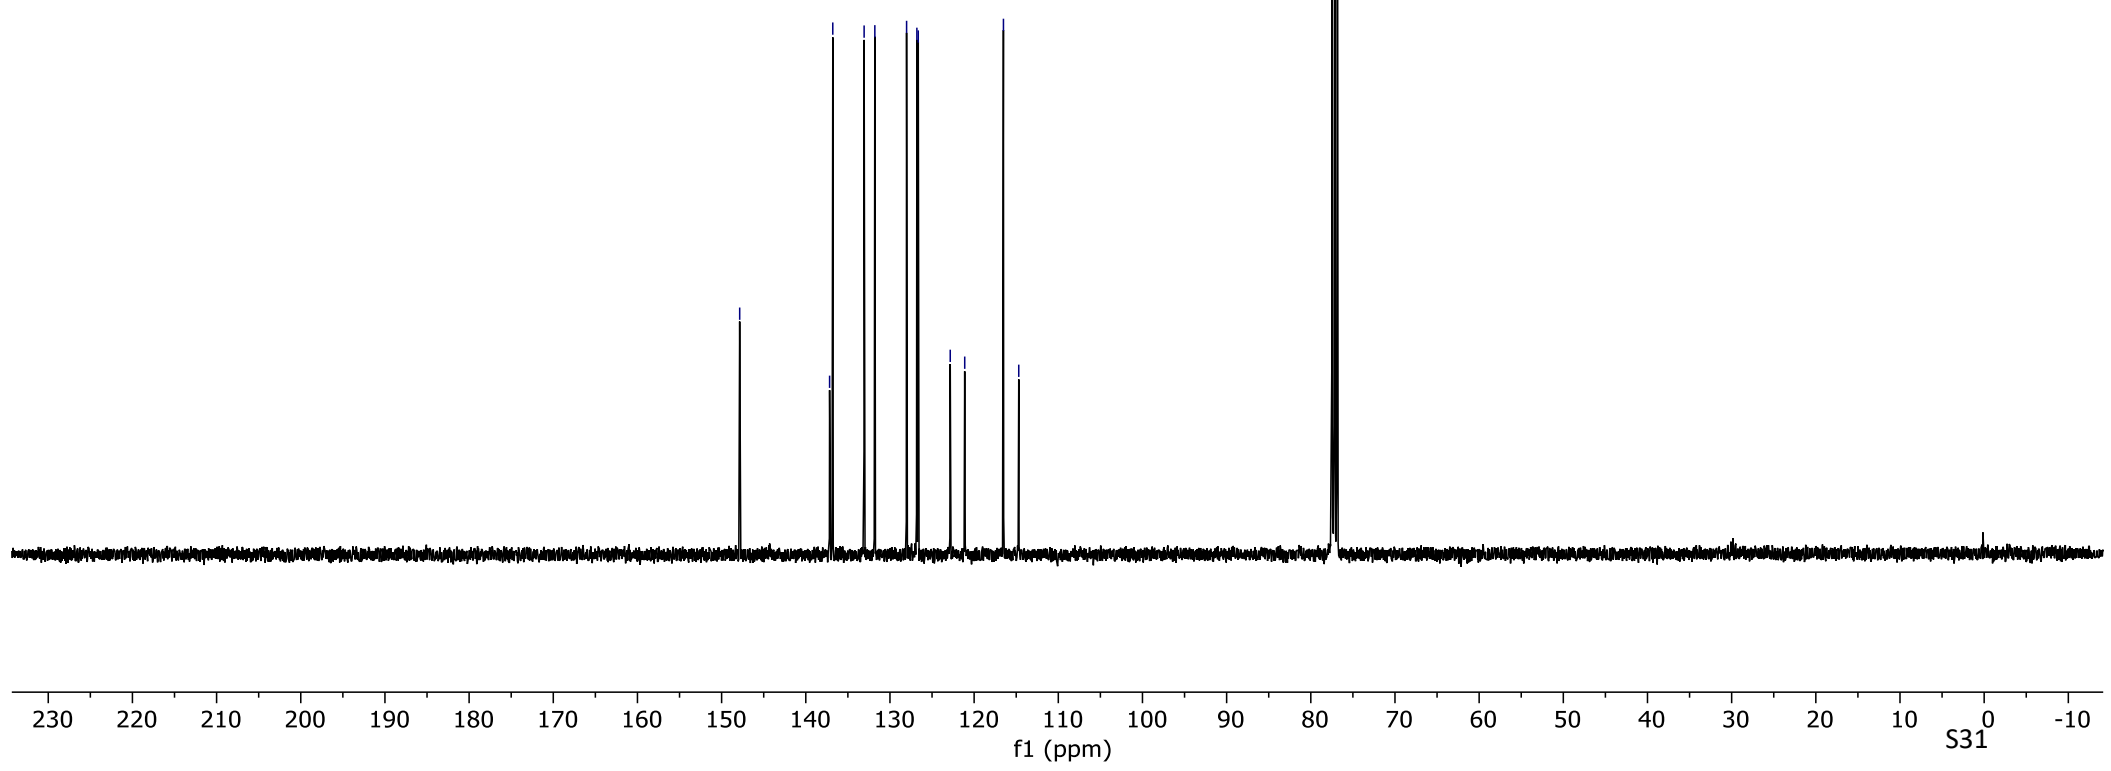

400 MHz, CDCl<sub>3</sub>

7.45  
7.44  
7.43  
7.43  
7.42  
7.42  
7.41  
7.40  
7.40  
7.39  
7.38  
7.38  
7.37  
7.36  
7.36  
7.33  
7.32  
7.32  
7.31  
7.31  
7.30  
7.29  
7.29  
7.28  
7.28  
7.26 CDCl<sub>3</sub>  
7.25  
7.25  
7.24  
7.24  
7.23  
7.23  
7.22  
7.22  
7.21  
7.20  
7.20  
7.20  
7.20  
7.17  
7.17  
7.15  
7.15  
7.15  
7.15  
7.14  
7.13  
7.13  
7.13  
7.12  
7.11  
7.11  
6.96  
6.96  
6.95  
6.95  
6.94  
6.94  
6.93  
6.93

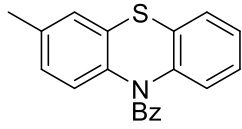

4a

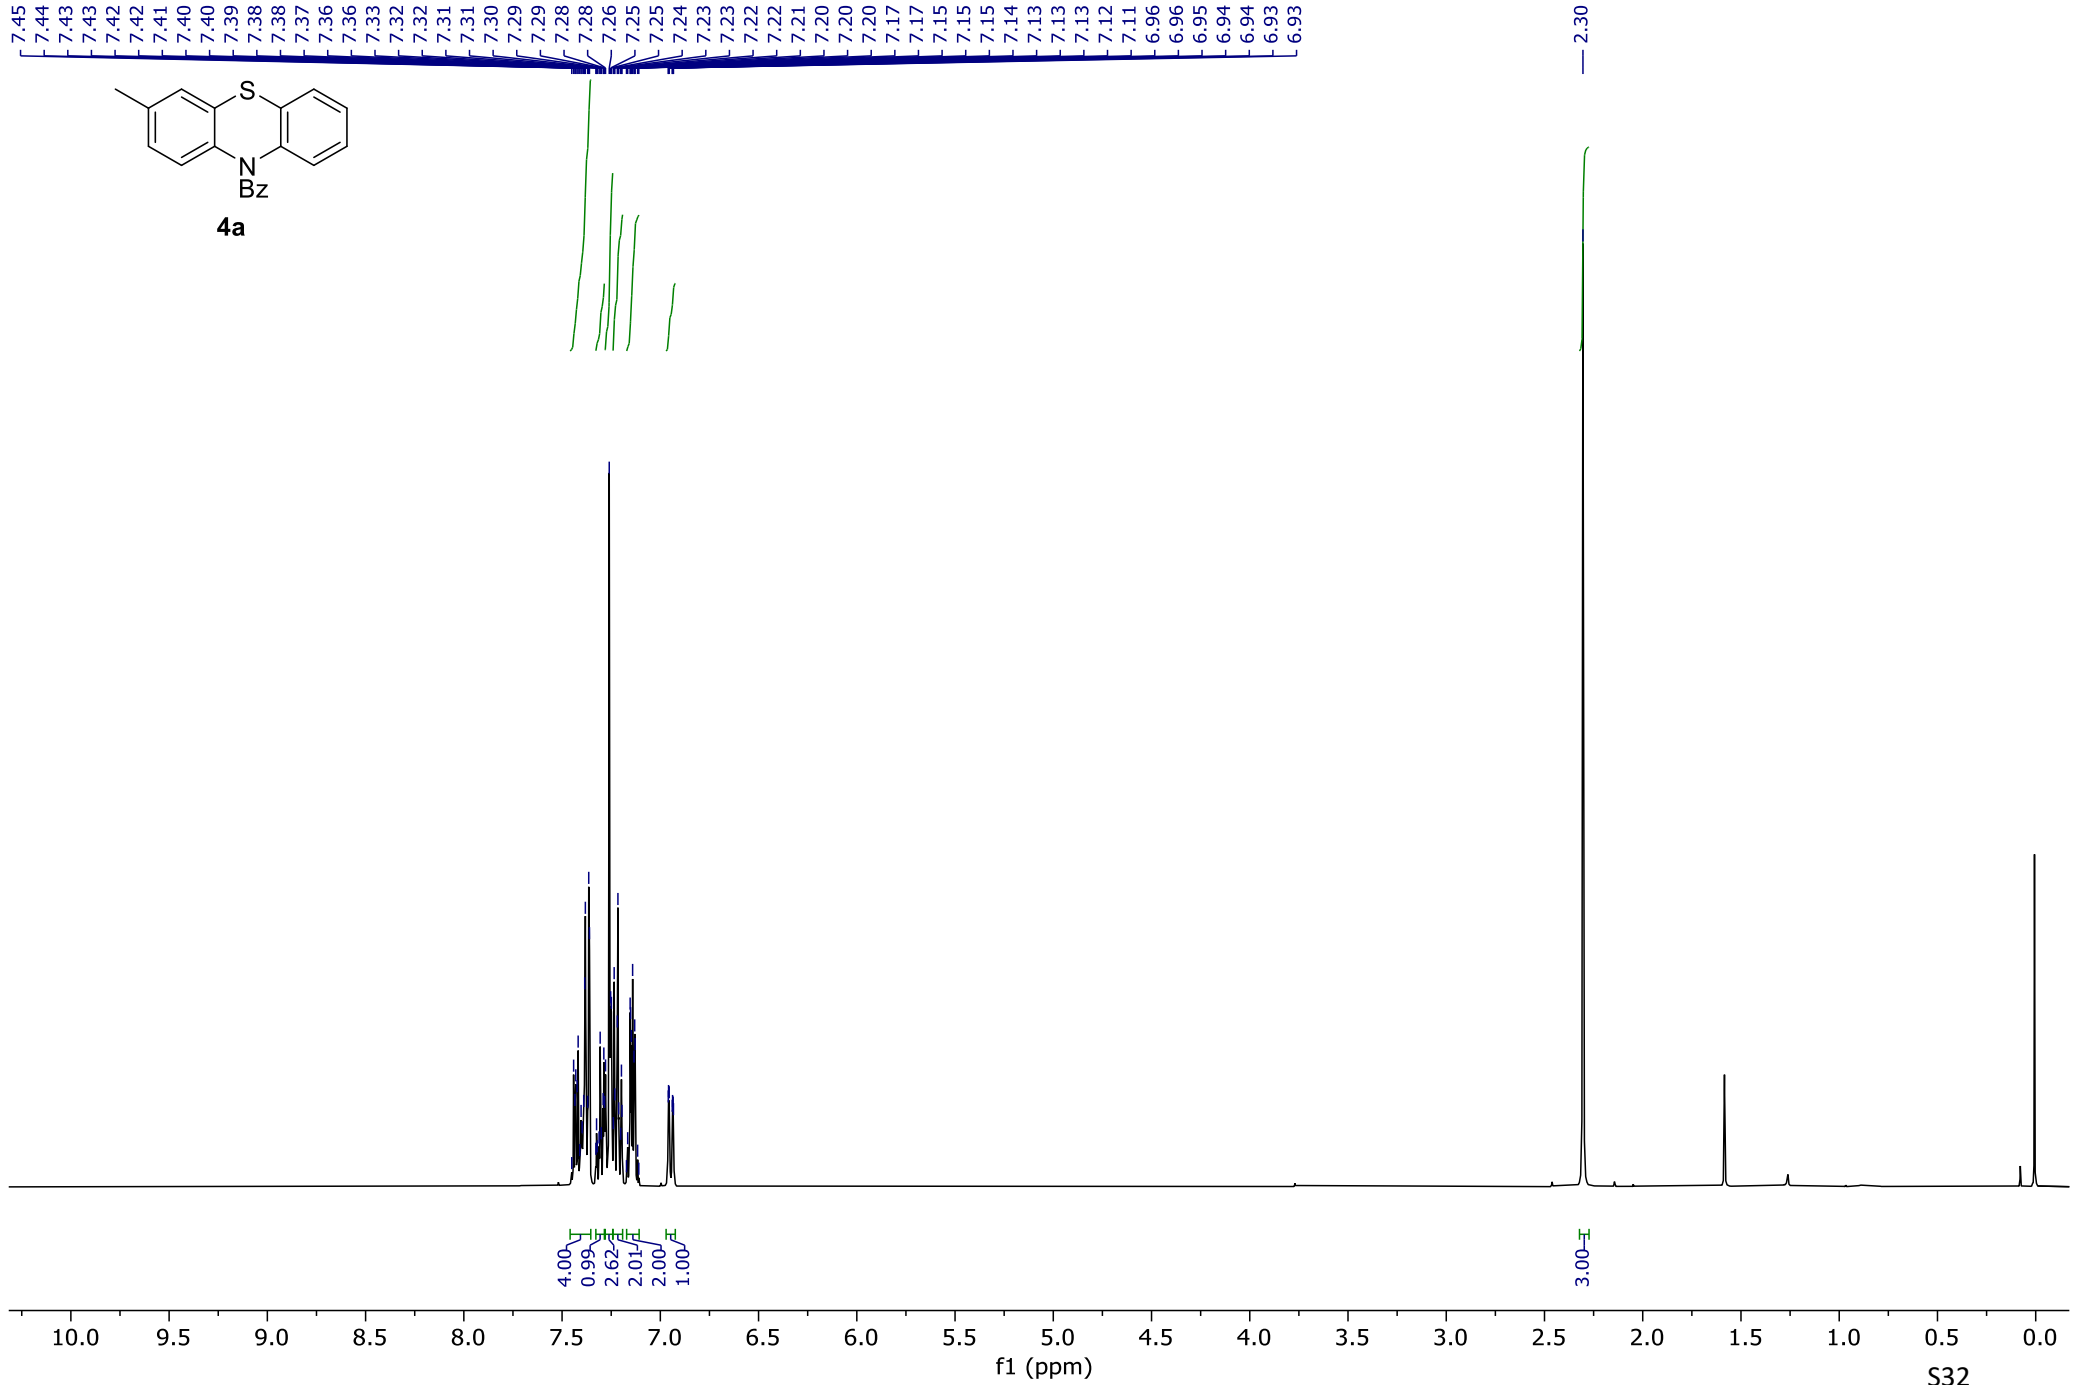



101 MHz, CDCl<sub>3</sub>

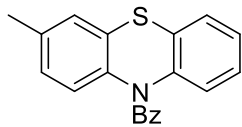

4a

168.99

139.77

137.05

136.60

135.46

132.43

132.03

130.38

128.96

128.16

128.07

127.81

127.79

127.19

126.90

126.83

126.46

77.16 CDCl<sub>3</sub>

21.00

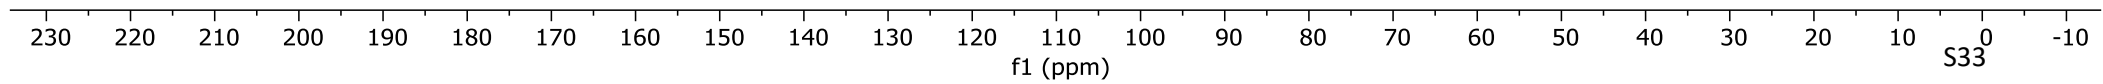

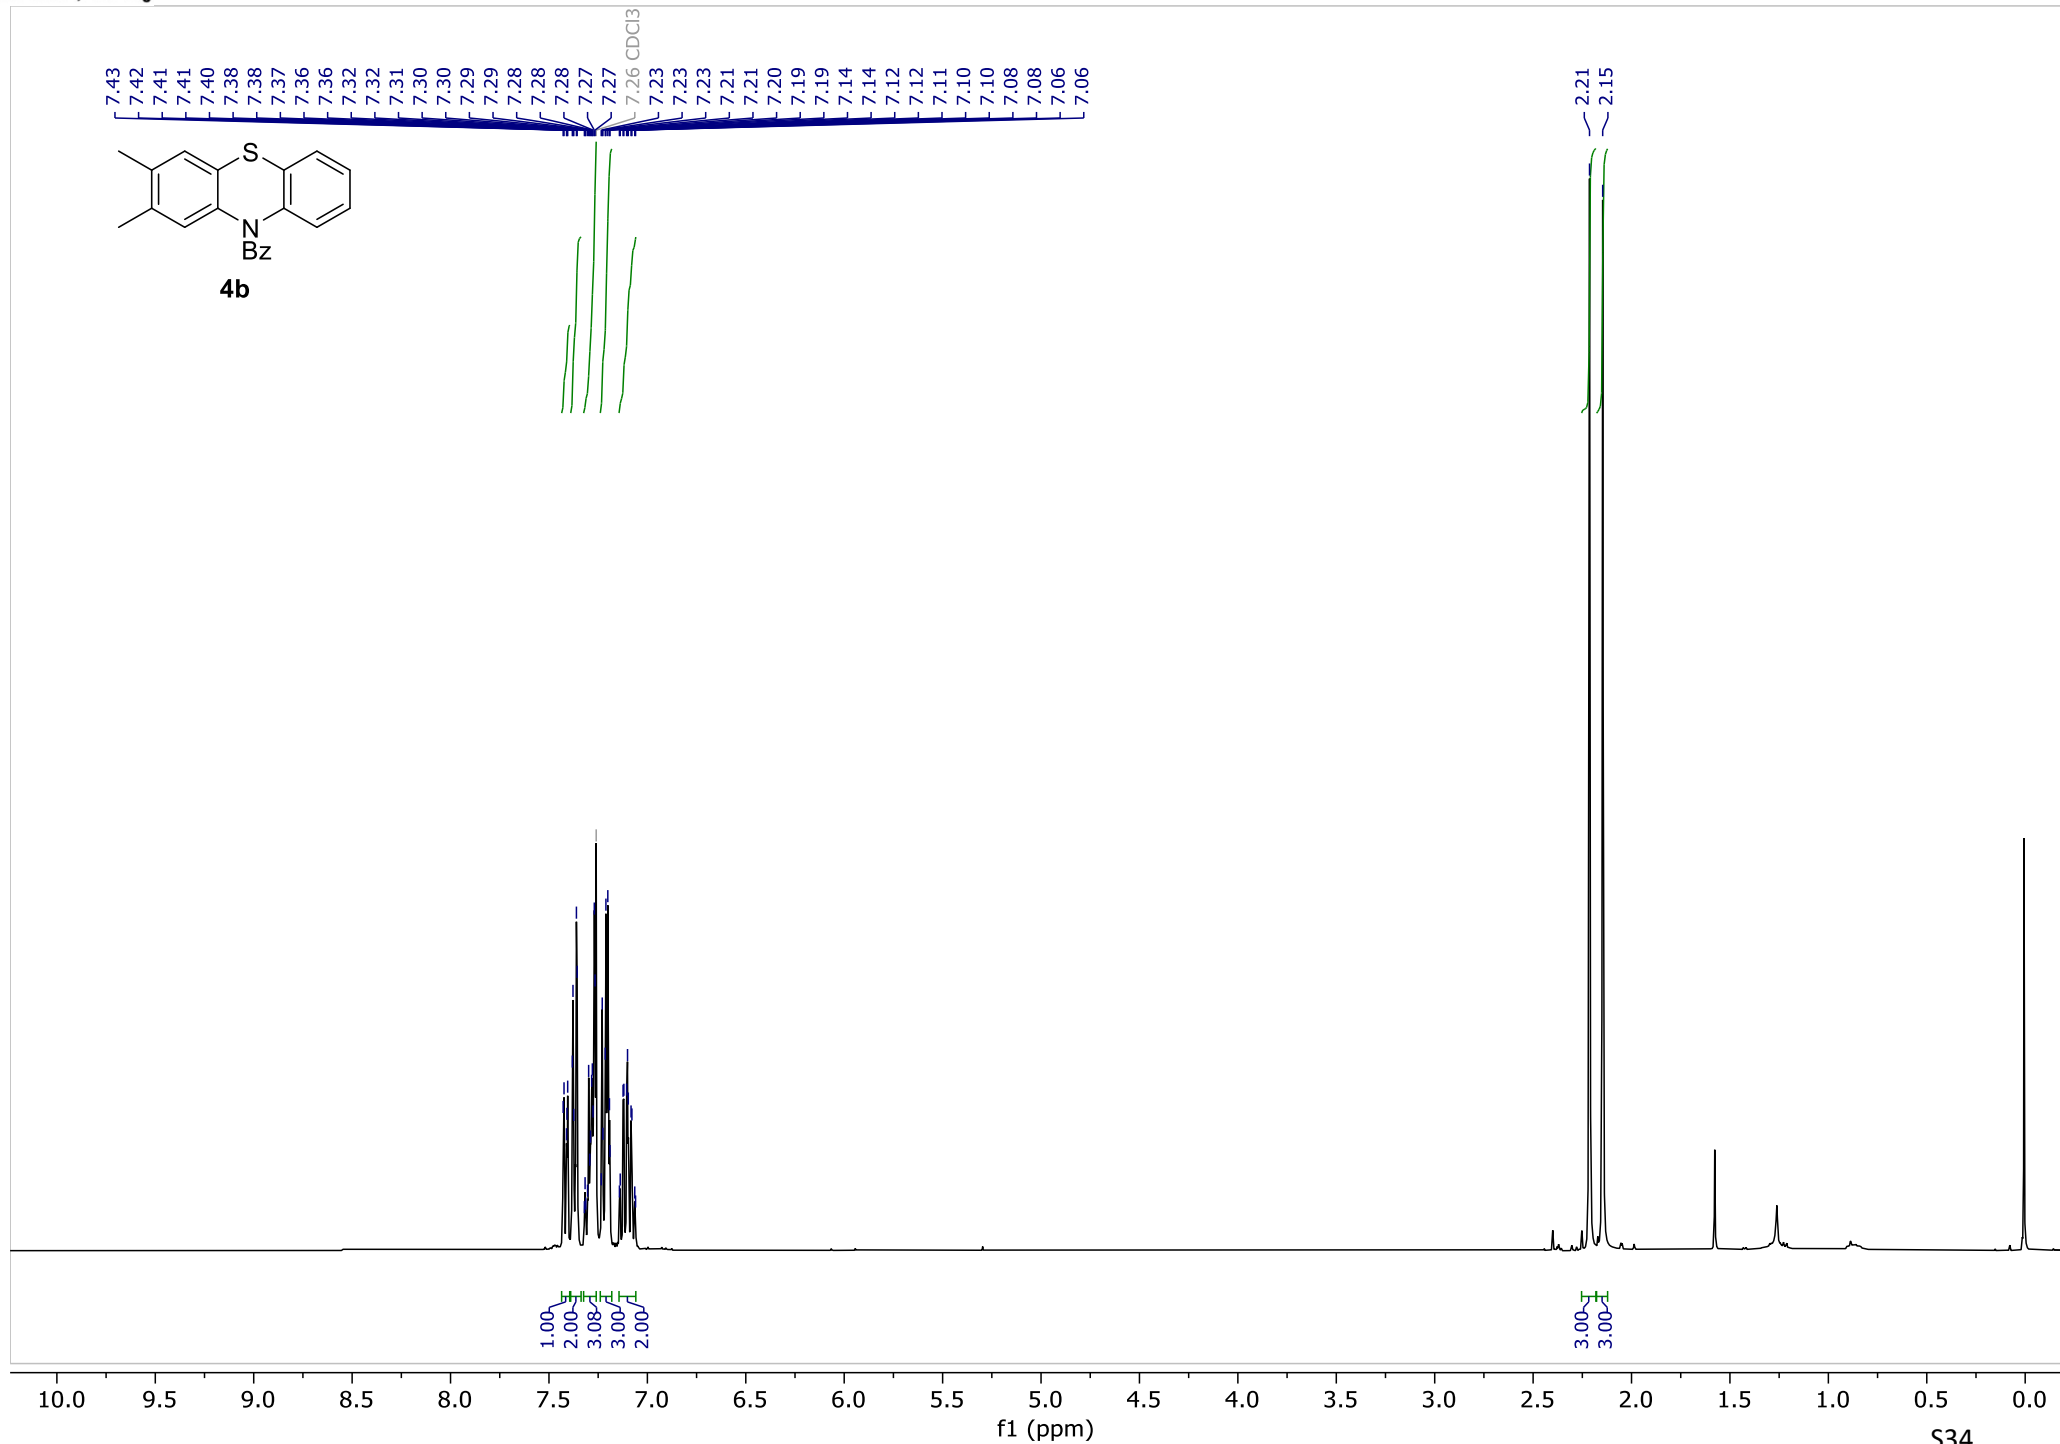

101 MHz, CDCl<sub>3</sub>

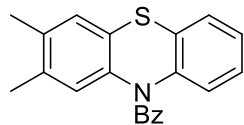

4b

168.98

140.00  
137.12  
135.76  
135.57  
135.33  
132.89  
130.31  
128.90  
128.77  
128.44  
128.08  
128.02  
127.79  
127.19  
126.77  
126.36

77.16 CDCl<sub>3</sub>

19.62  
19.46

230 220 210 200 190 180 170 160 150 140 130 120 110 100 90 80 70 60 50 40 30 20 10 0 -10

f1 (ppm)

S35

400 MHz, CDCl<sub>3</sub>

7.45  
7.45  
7.44  
7.43  
7.42  
7.39  
7.38  
7.37  
7.37  
7.33  
7.32  
7.32  
7.31  
7.31  
7.30  
7.30  
7.29  
7.29  
7.29  
7.28  
7.28  
7.27  
7.26 CDCl<sub>3</sub>  
7.23  
7.22  
7.22  
7.21  
7.20  
7.20  
7.16  
7.15  
7.14  
7.14  
7.13  
7.12  
7.11  
7.11  
7.11  
7.09  
7.09  
7.07  
7.07

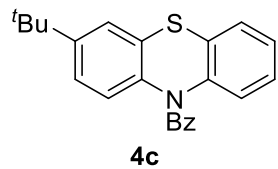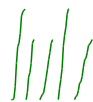

3.02  
2.01  
2.00  
3.03  
2.01

9.08  
1.30

10.0 9.5 9.0 8.5 8.0 7.5 7.0 6.5 6.0 5.5 5.0 4.5 4.0 3.5 3.0 2.5 2.0 1.5 1.0 0.5 0.0

f1 (ppm)

S36

101 MHz, CDCl<sub>3</sub>

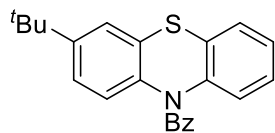

4c

168.99

149.96

139.90

136.80

135.45

132.57

131.61

130.39

128.98

128.02

127.80

127.22

126.86

126.56

126.42

124.59

124.29

77.16 CDCl<sub>3</sub>

34.76

31.37

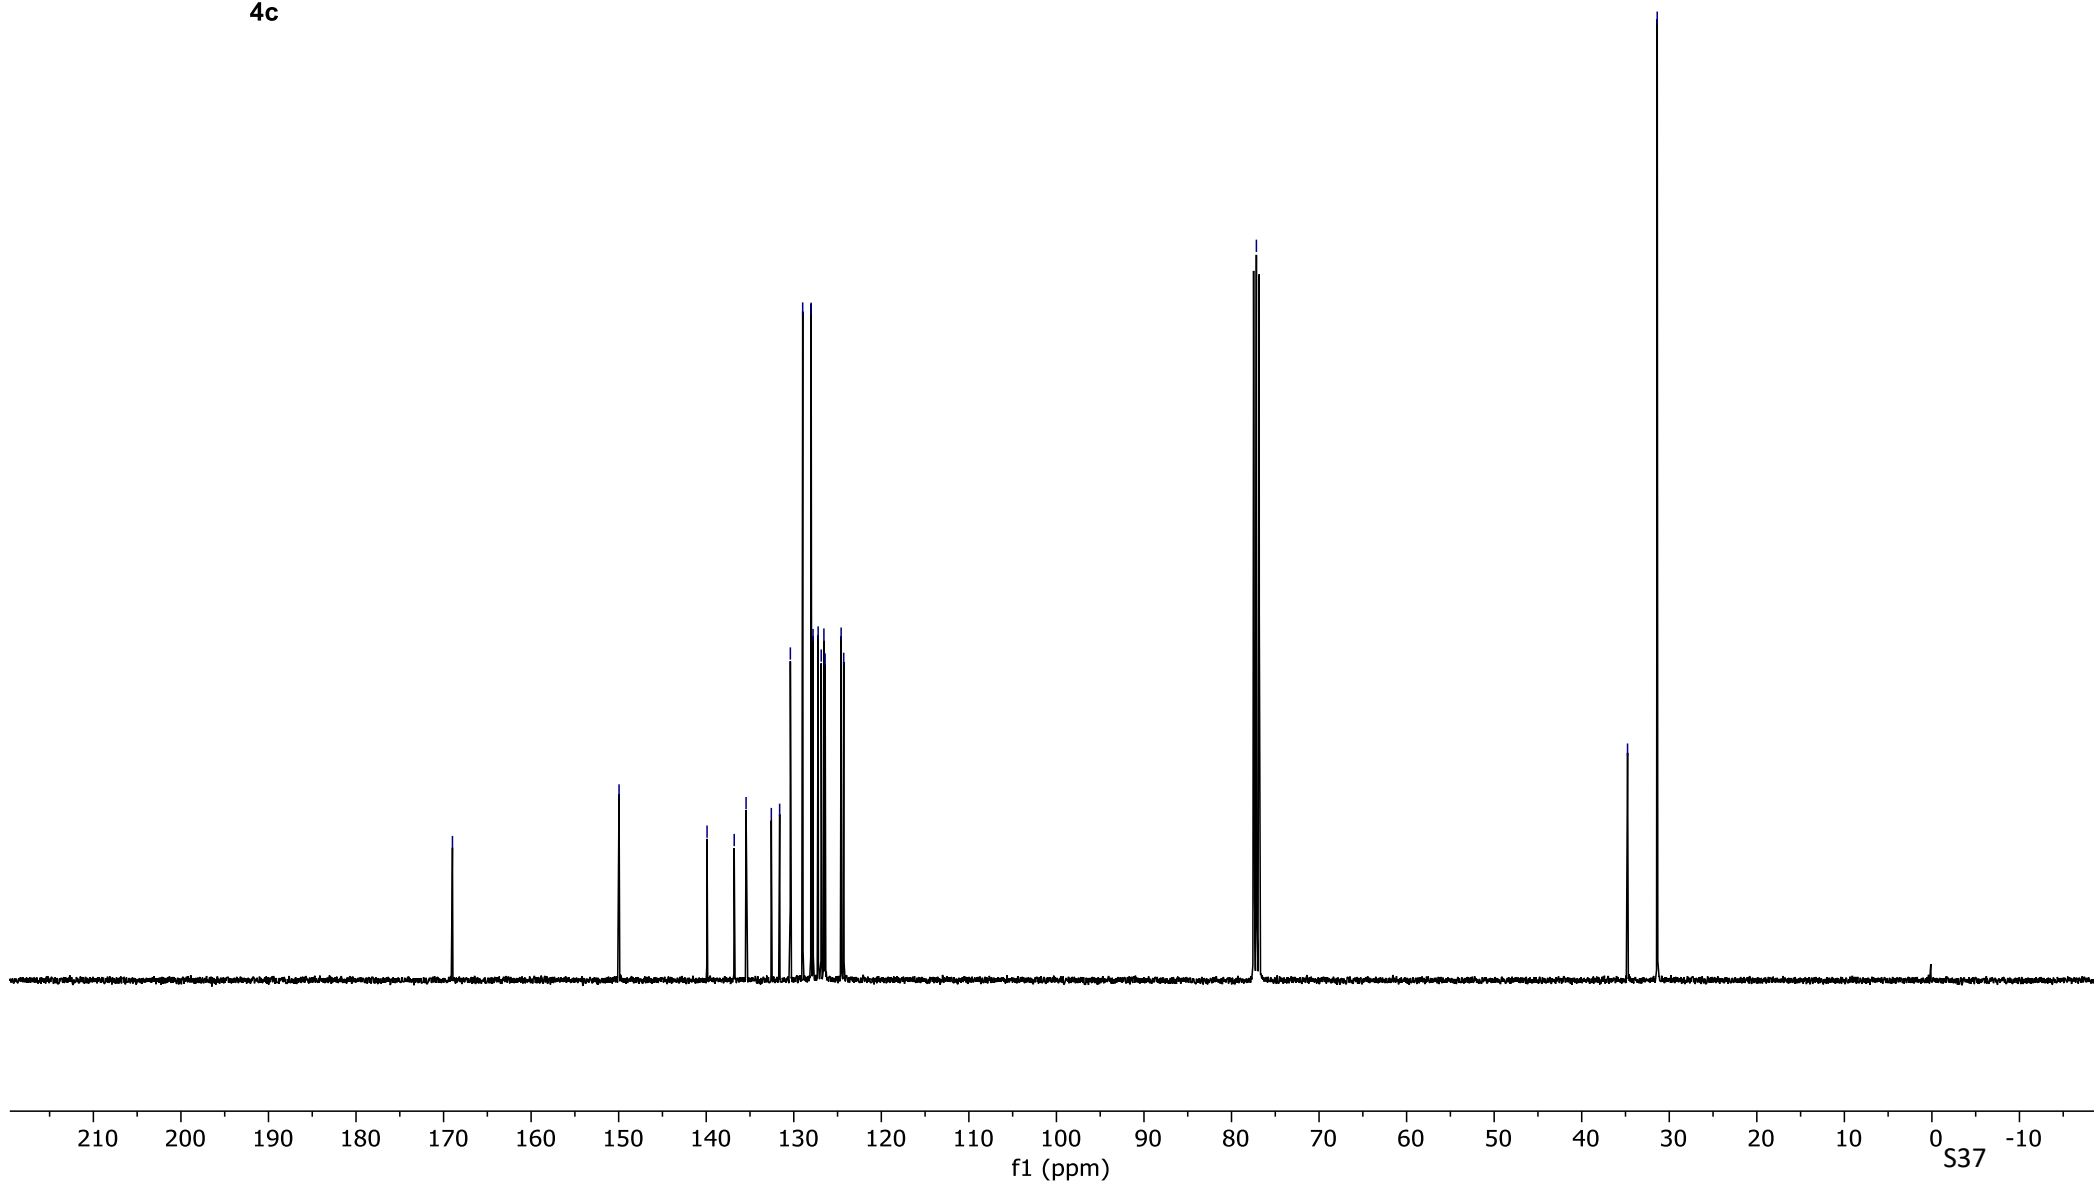

400 MHz, CDCl<sub>3</sub>

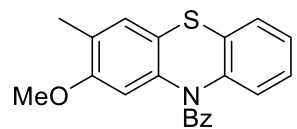

4d

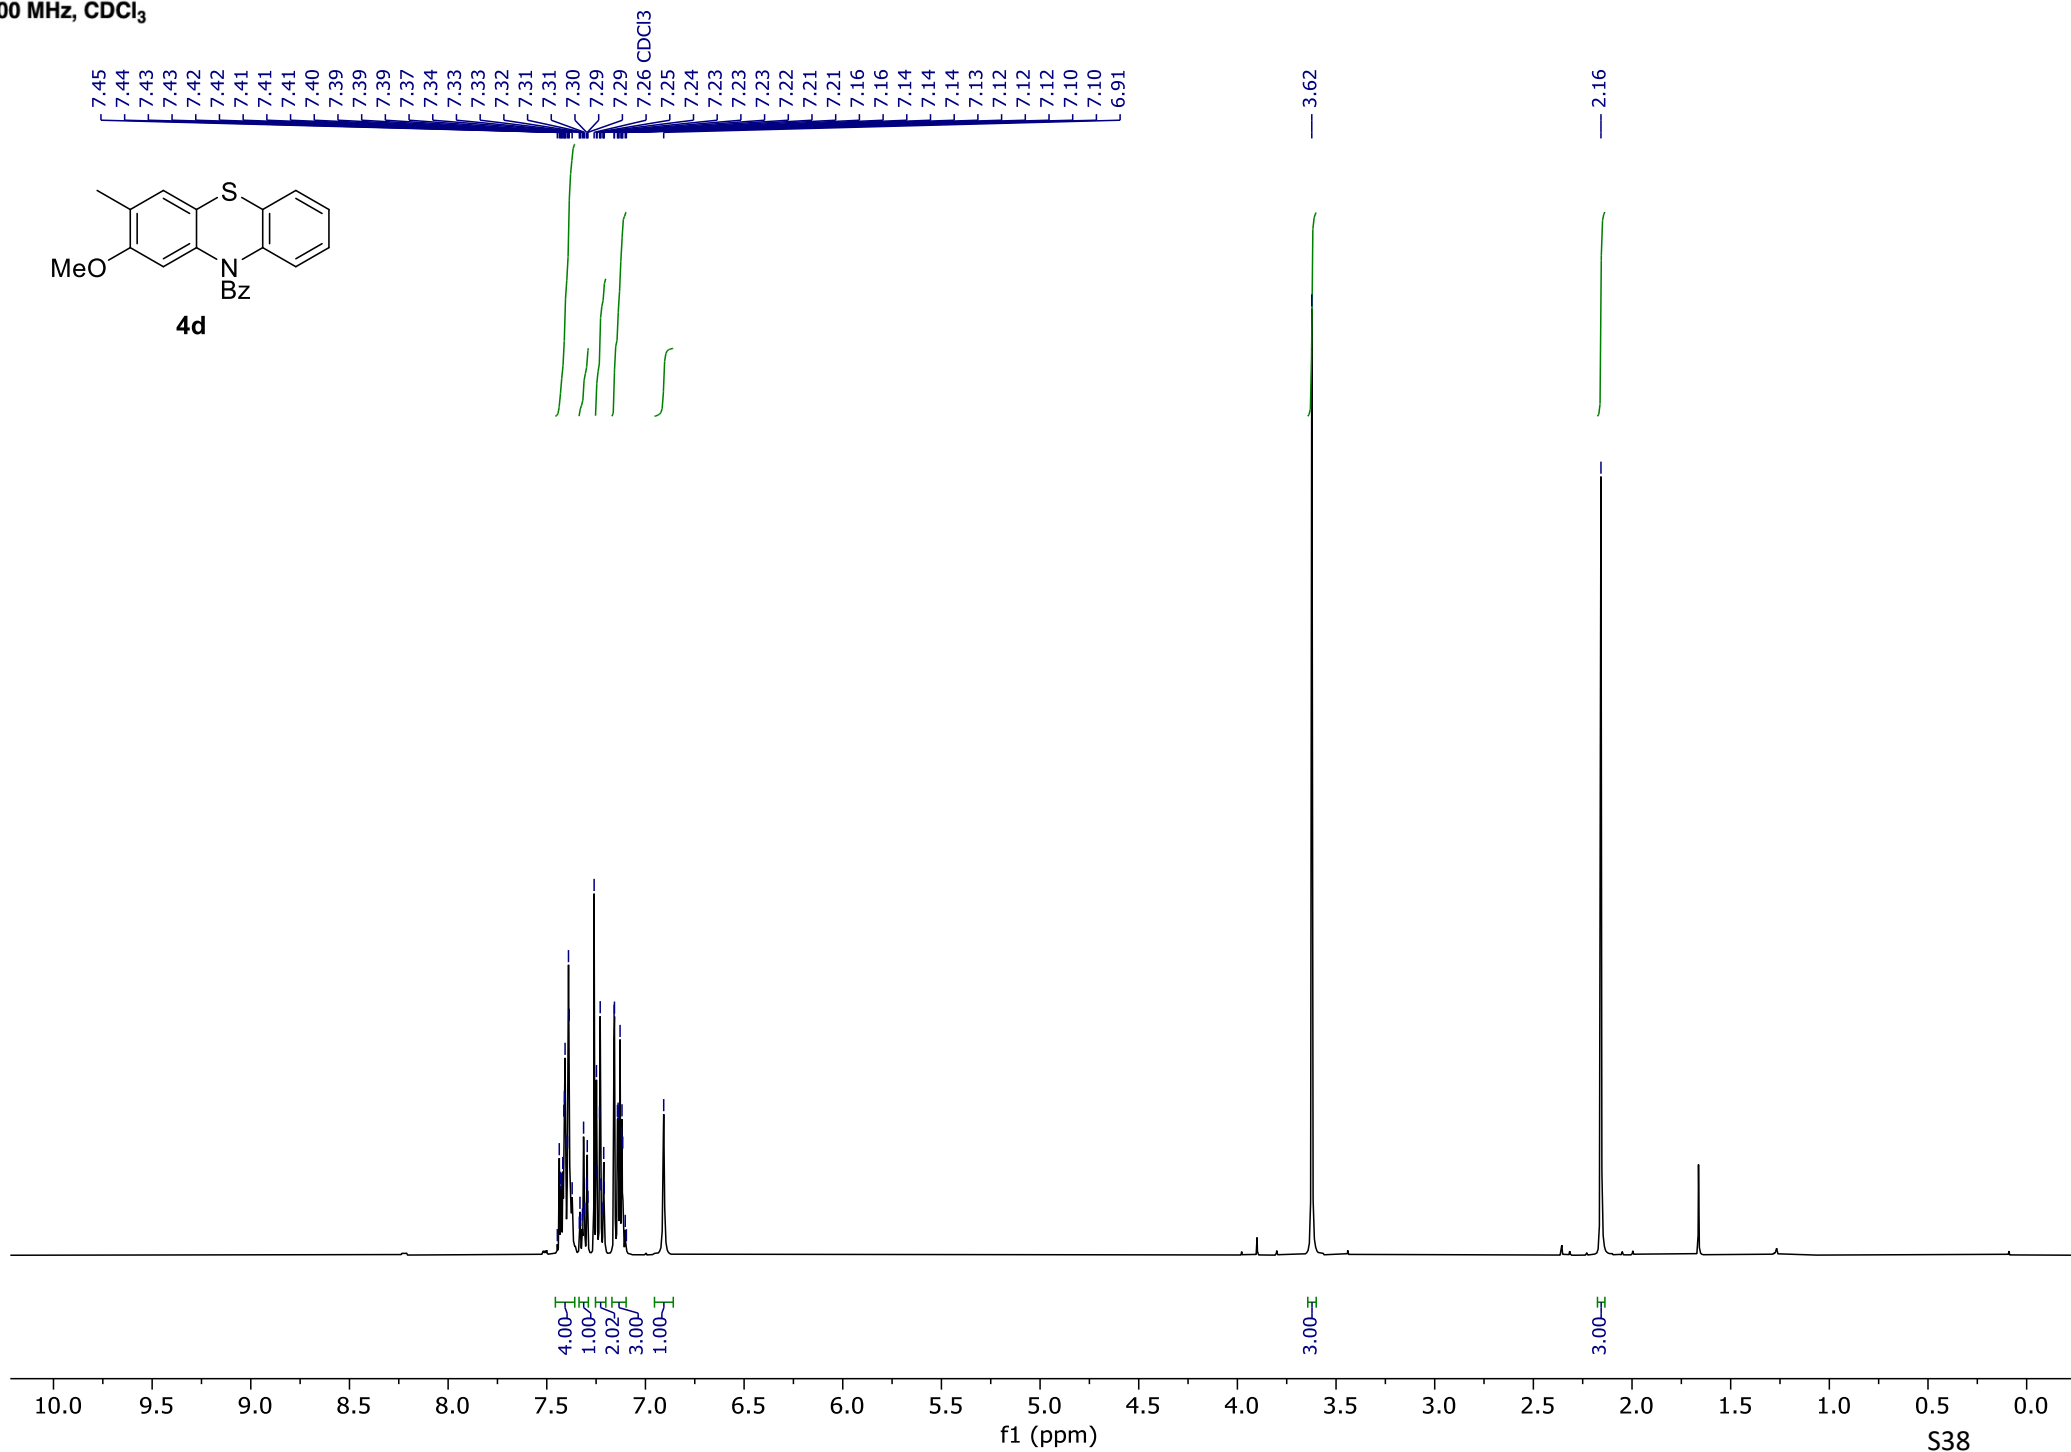

101 MHz, CDCl<sub>3</sub>

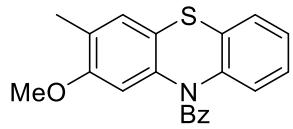

4d

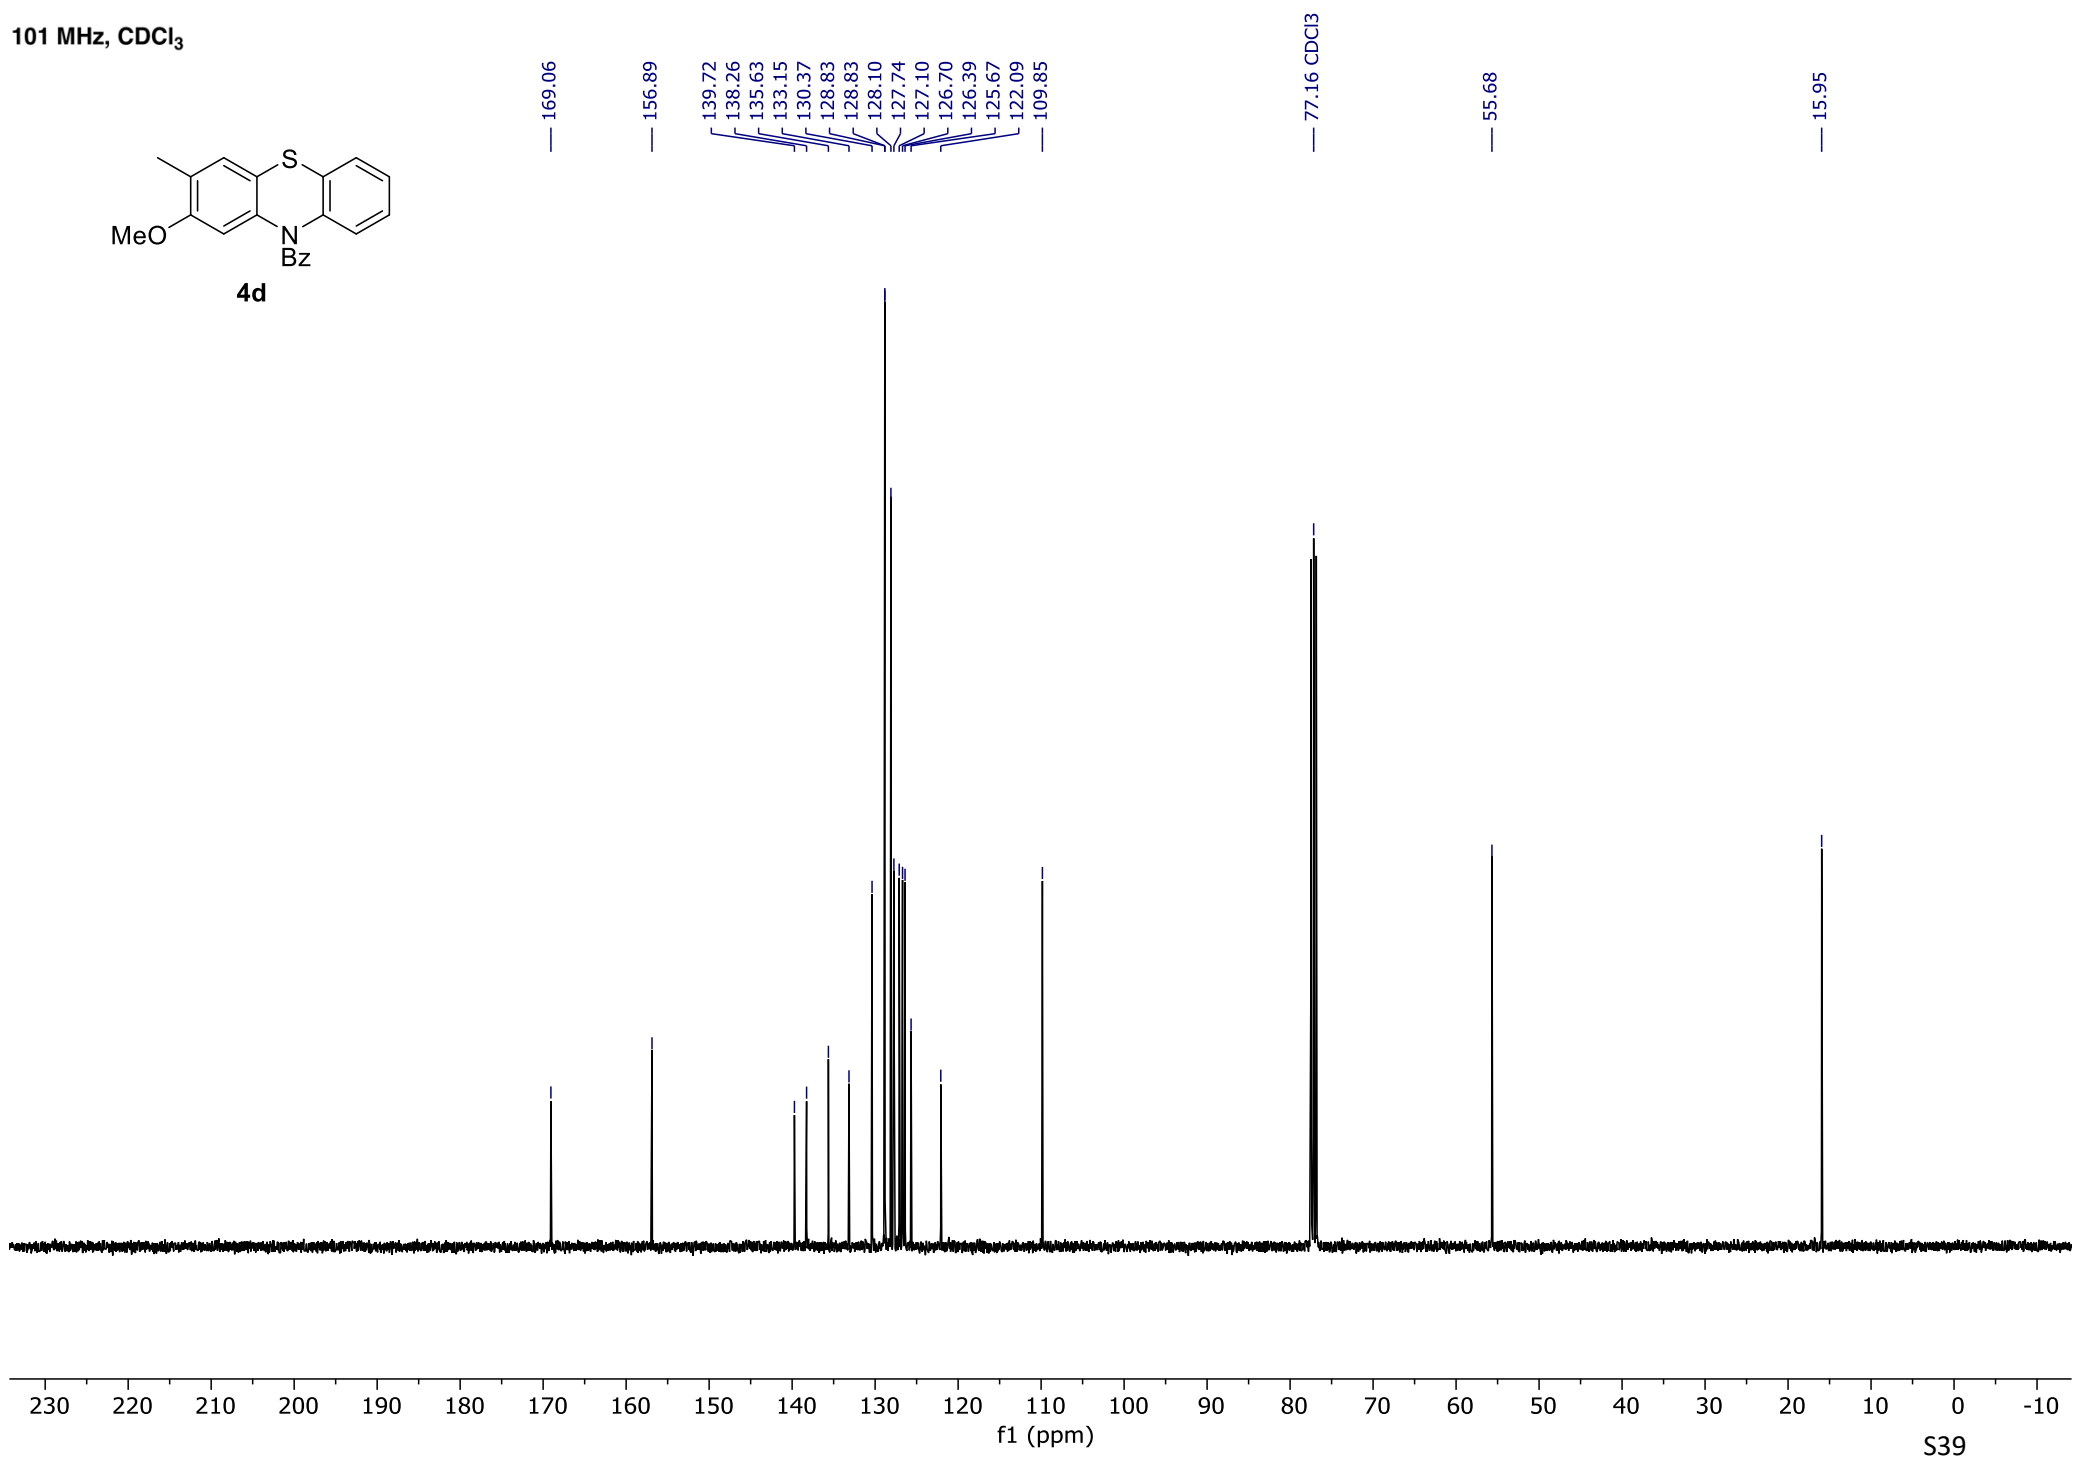

400 MHz, CDCl<sub>3</sub>

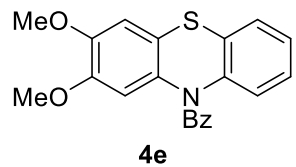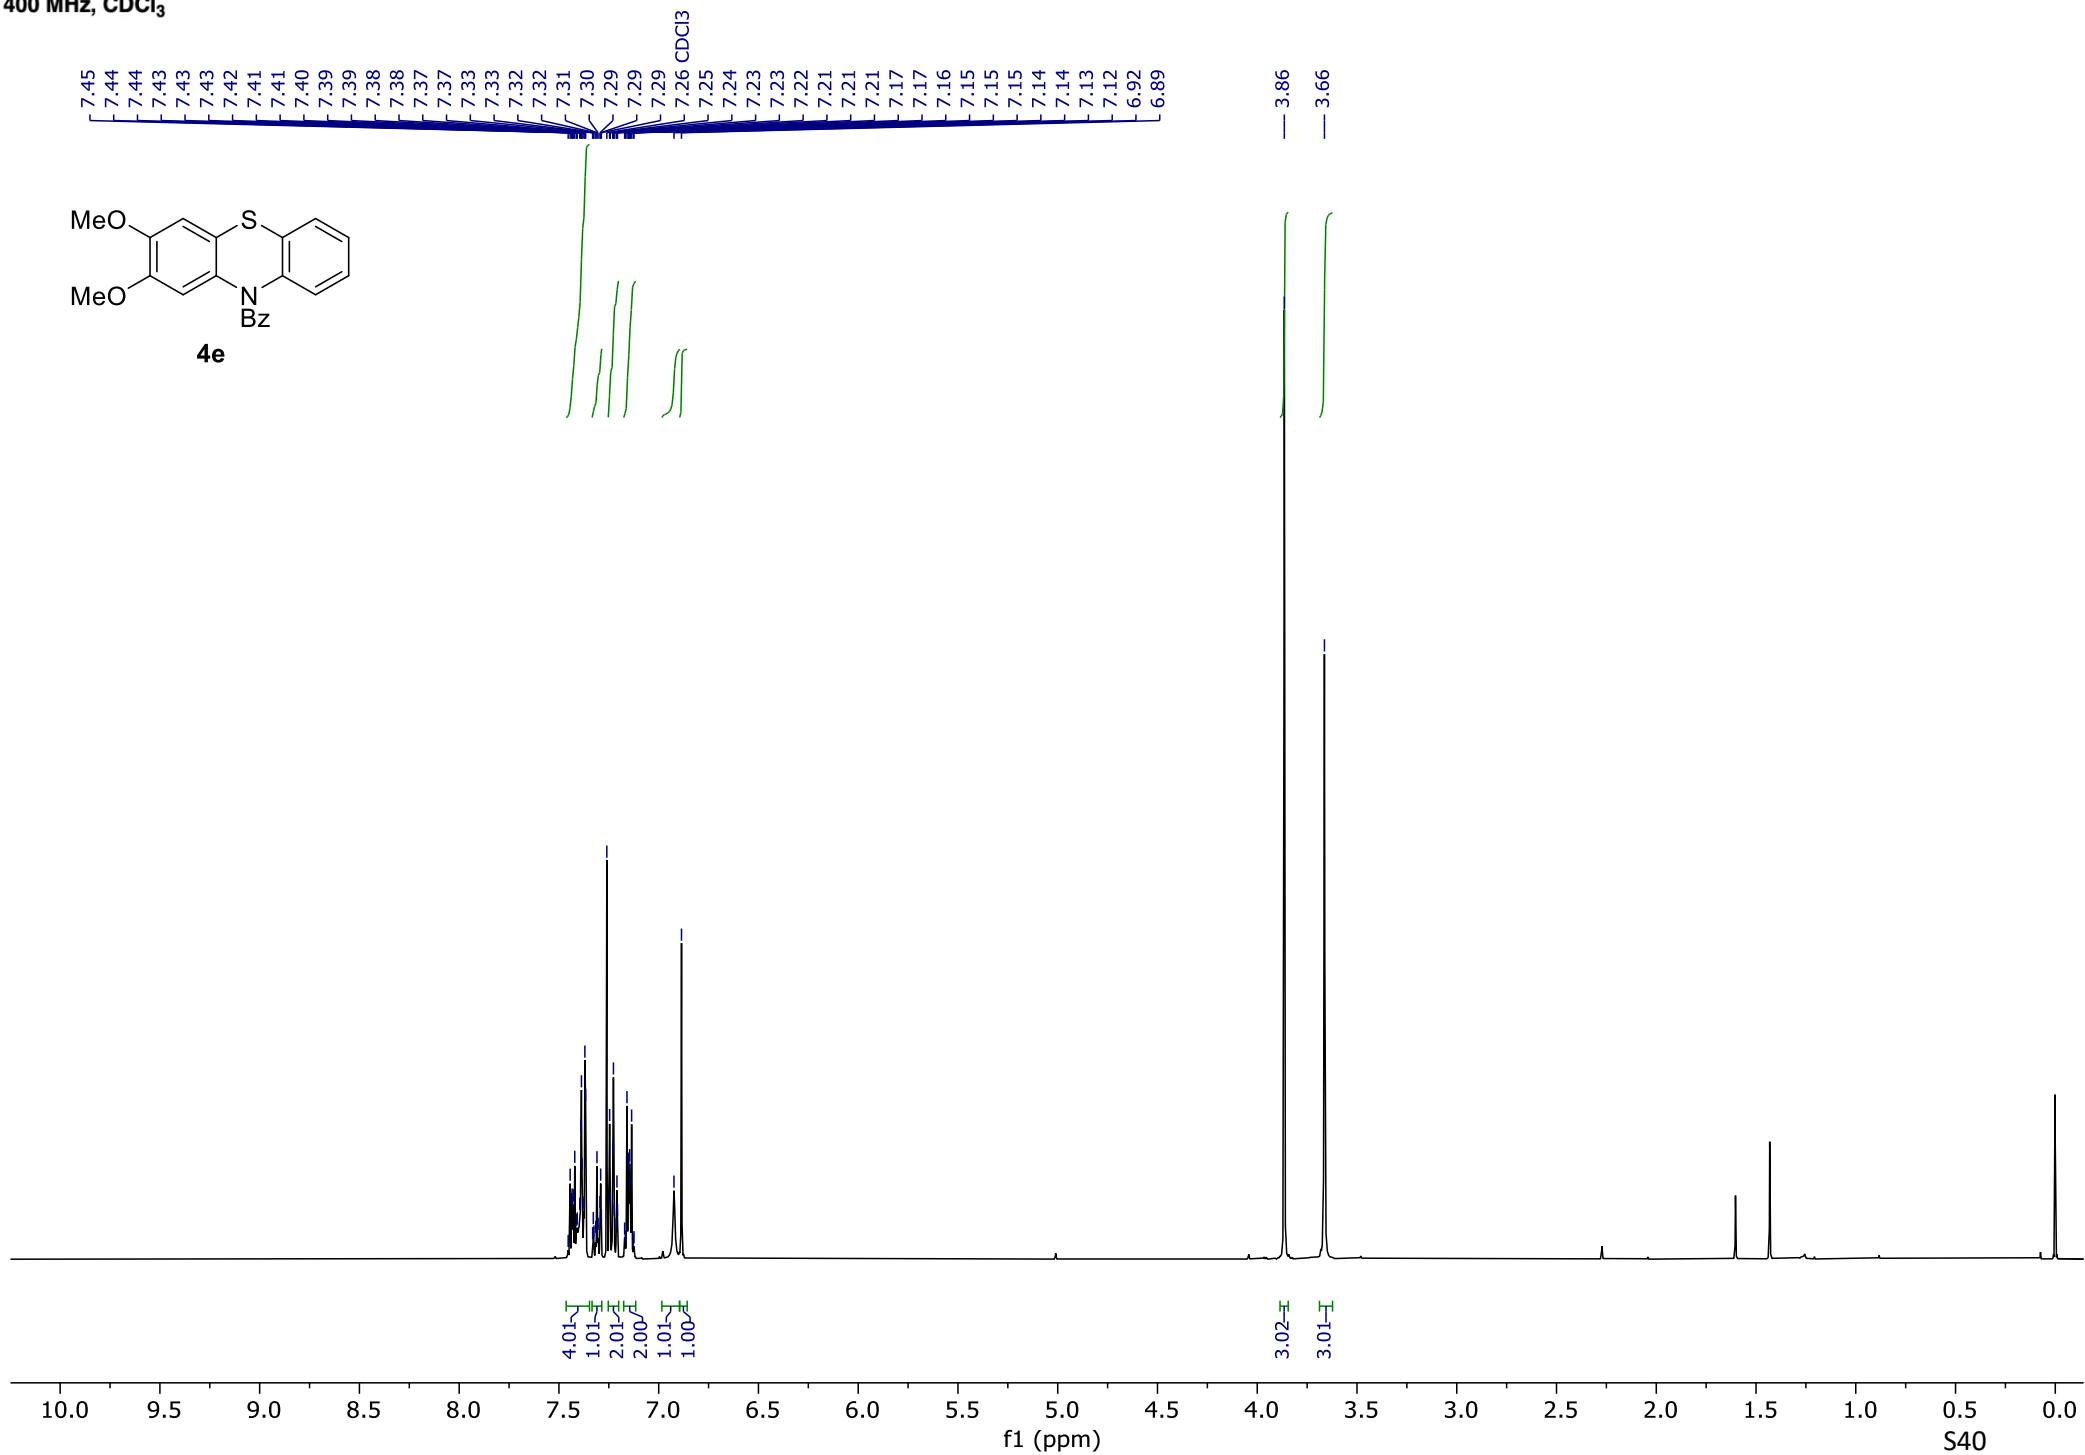

S40



101 MHz, CDCl<sub>3</sub>

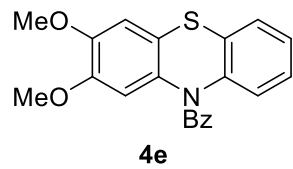

169.05

148.10  
147.61  
139.75  
135.56  
132.84  
132.66  
130.39  
128.79  
128.15  
127.70  
127.14  
126.88  
126.44  
123.01  
111.13  
109.86

77.16 CDCl<sub>3</sub>

56.32  
56.23

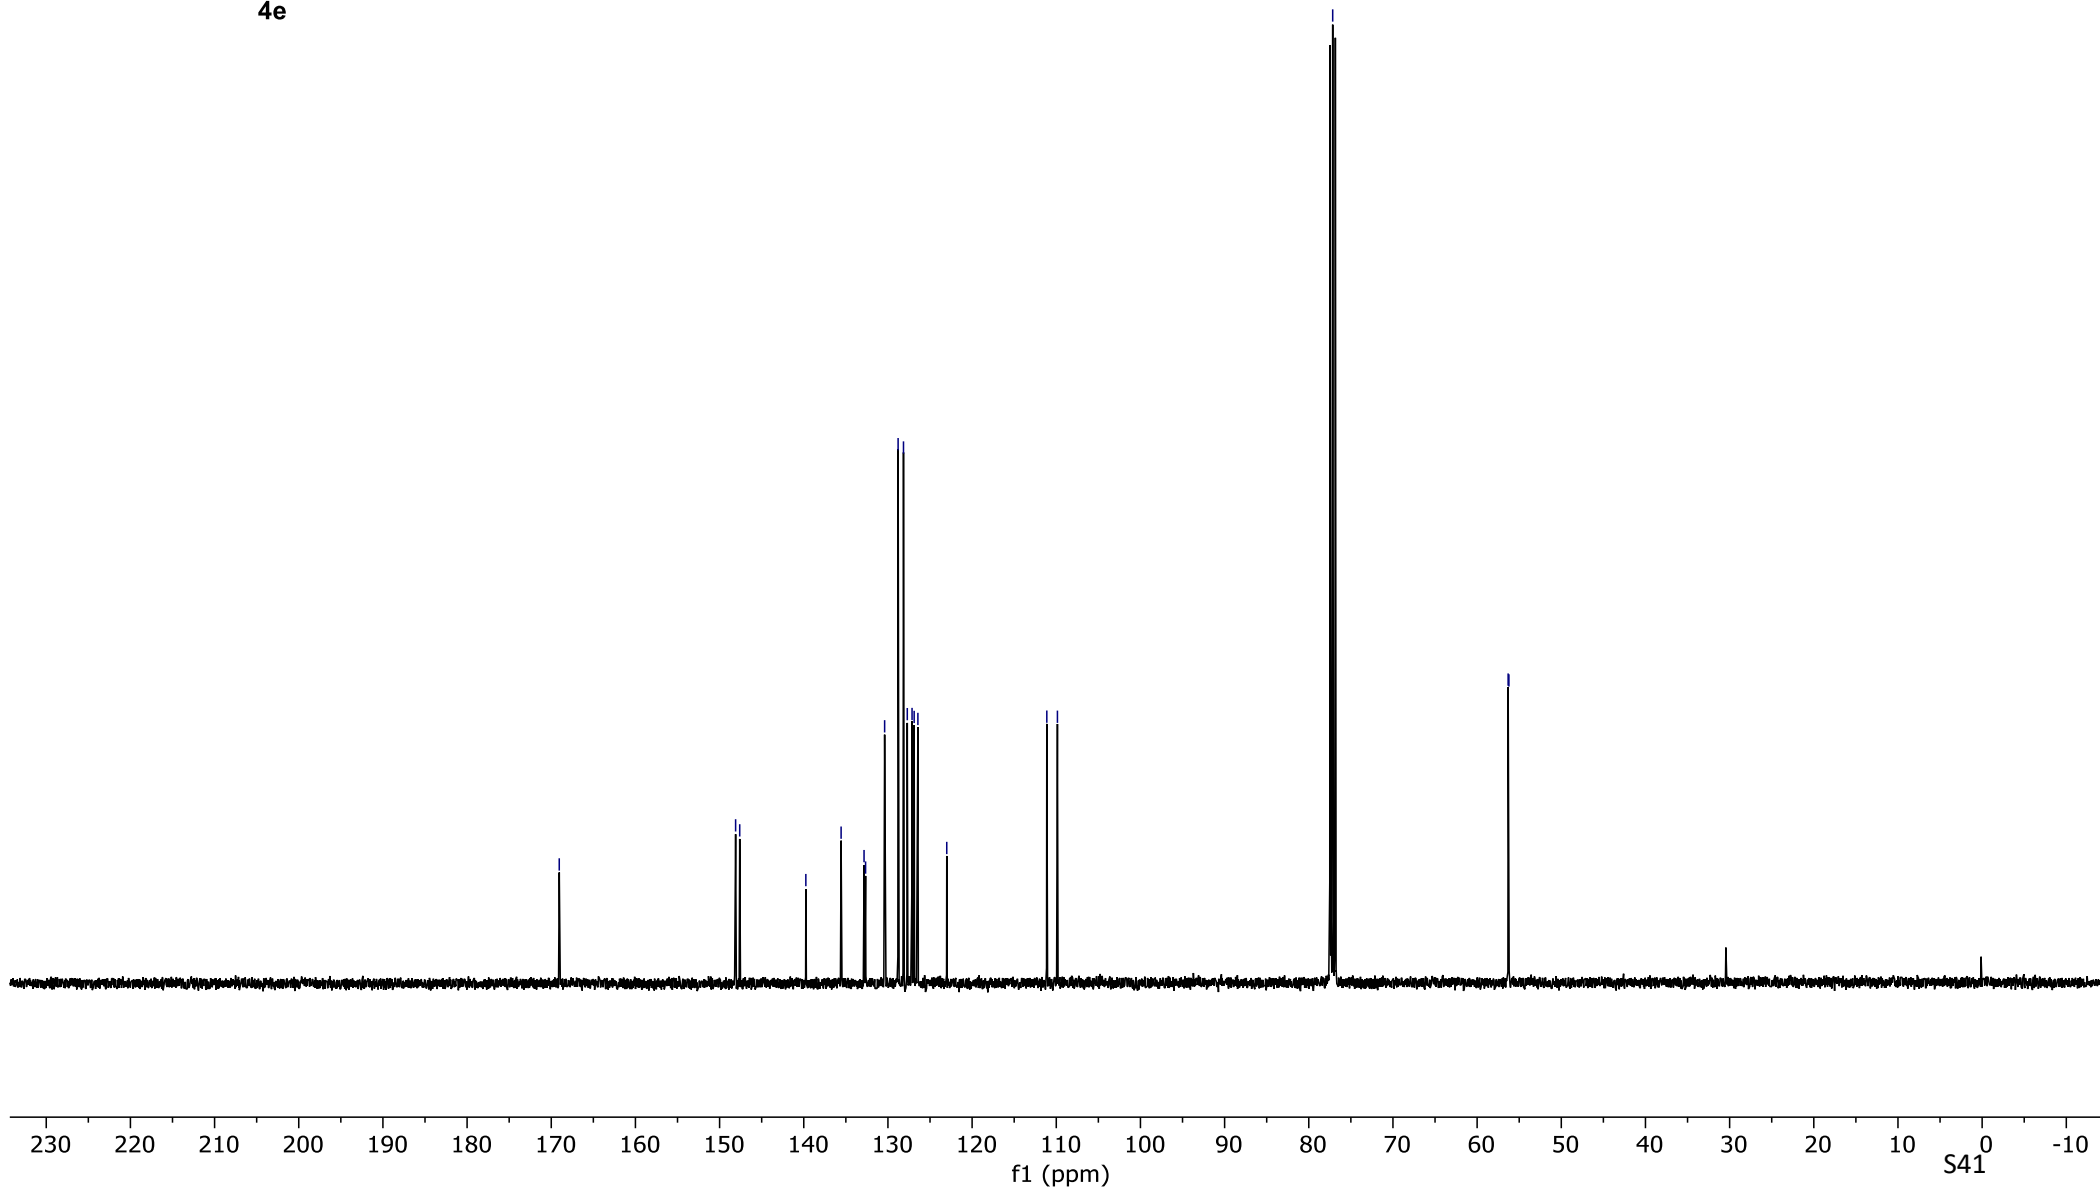

400 MHz, CDCl<sub>3</sub>

7.44  
7.43  
7.42  
7.42  
7.41  
7.38  
7.38  
7.36  
7.36  
7.32  
7.31  
7.30  
7.26 CDCl<sub>3</sub>  
7.25  
7.25  
7.24  
7.23  
7.23  
7.22  
7.22  
7.22  
7.21  
7.14  
7.14  
7.12  
7.12  
7.11  
7.11  
7.09  
7.09  
7.03  
6.88

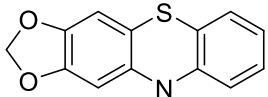

4f

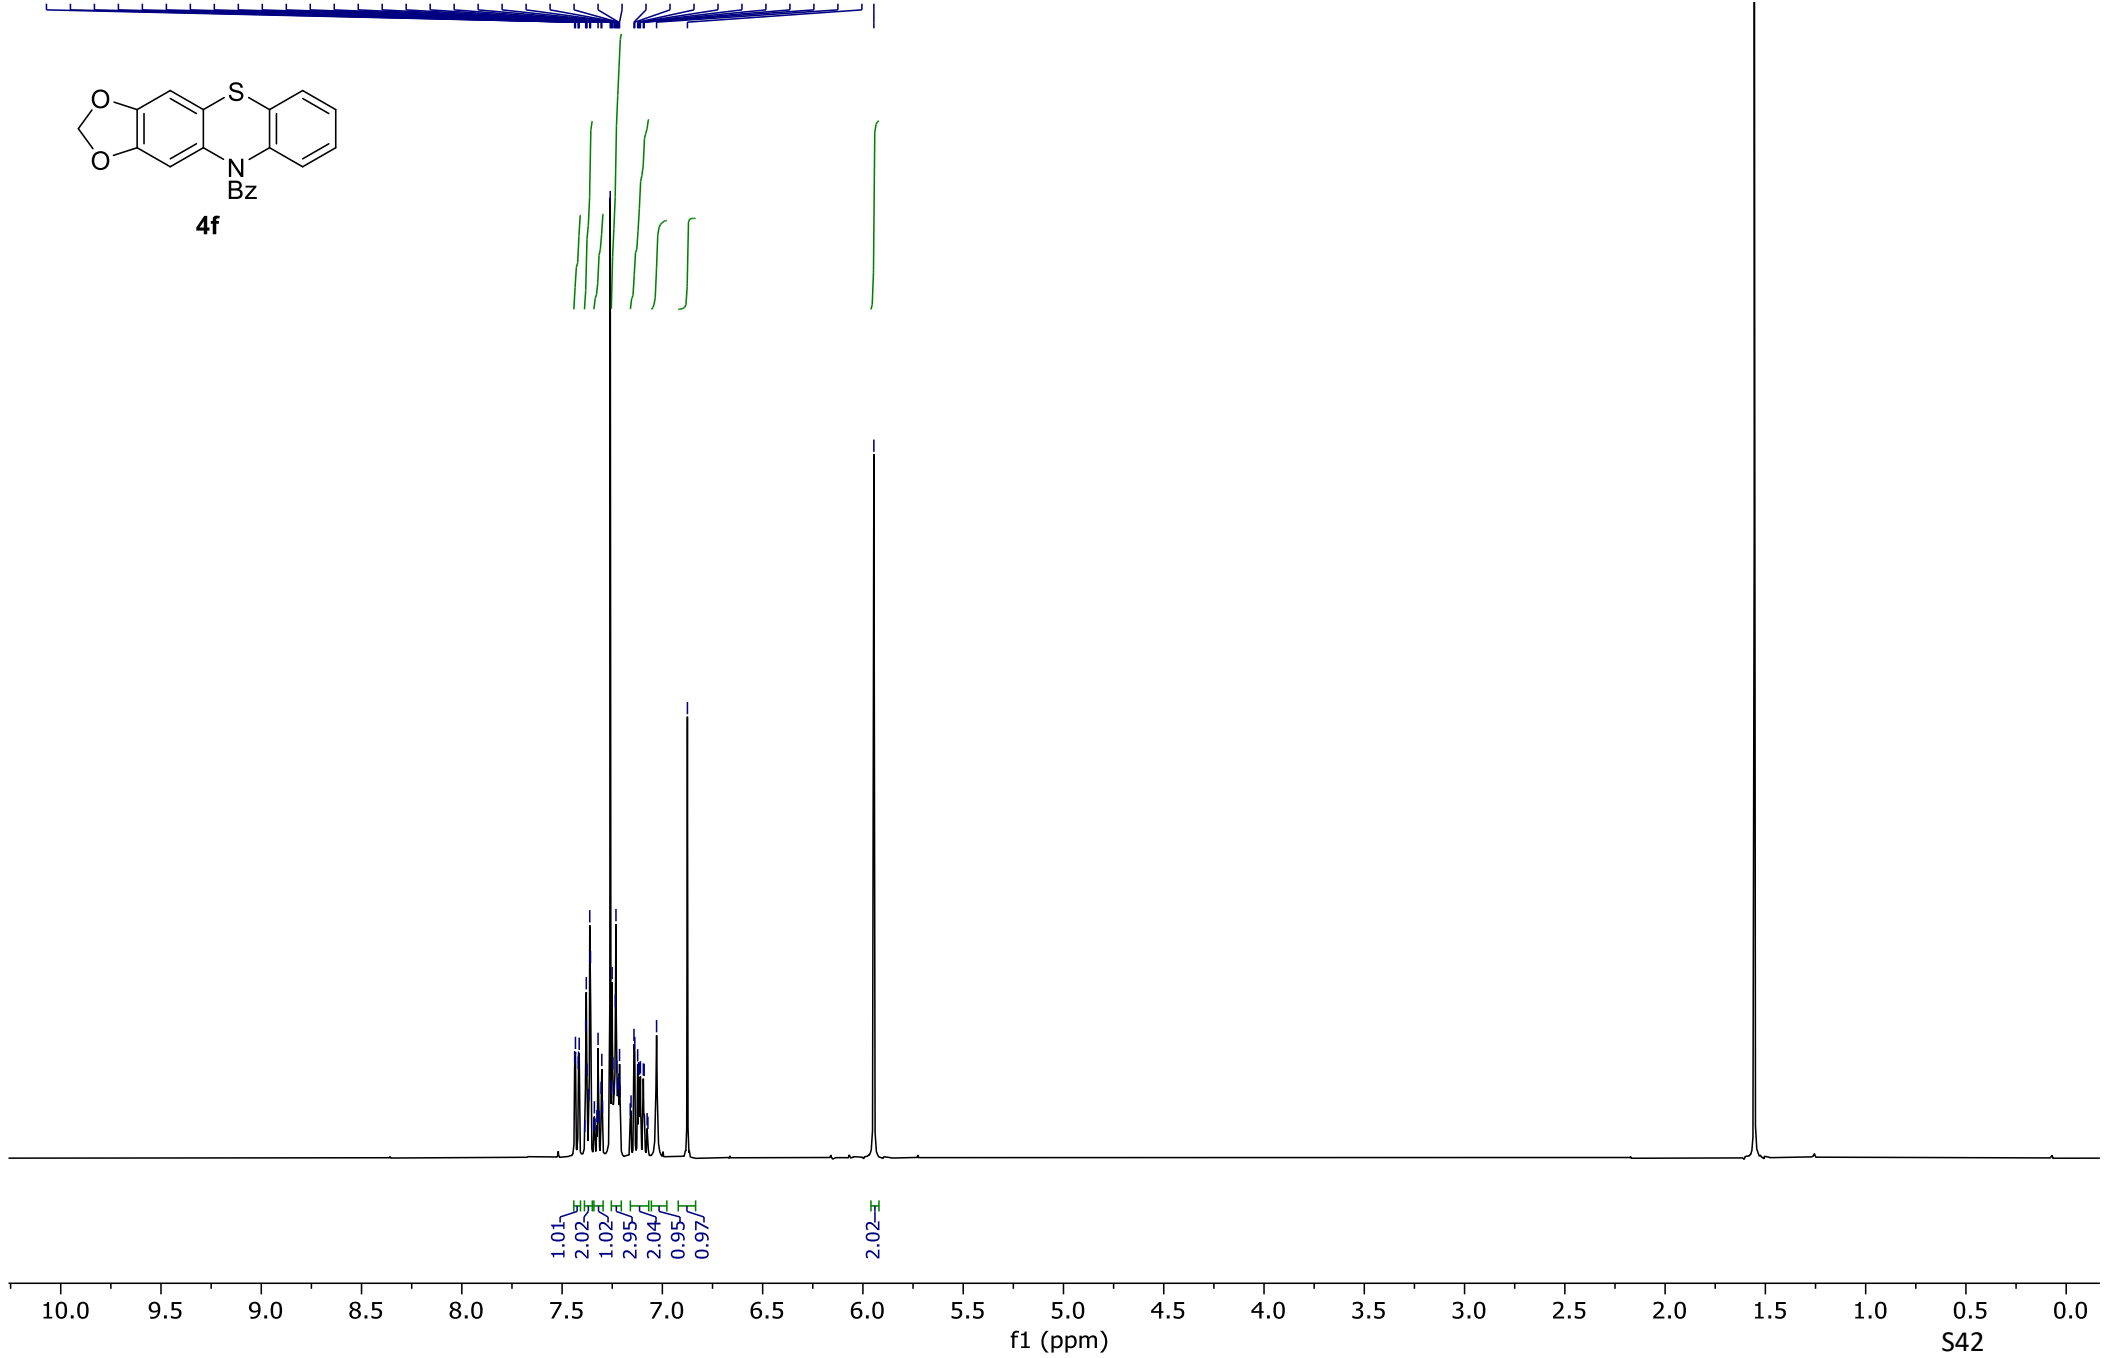

1.01  
2.02  
1.02  
2.95  
2.04  
0.95  
0.97  
2.02

S42

101 MHz, CDCl<sub>3</sub>

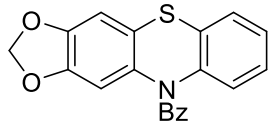

4f

168.96

147.32  
146.32  
140.10  
135.30  
133.55  
133.22  
130.53  
128.92  
128.17  
127.67  
127.18  
127.00  
126.51  
124.76  
108.62  
107.39  
102.08

77.46 CDCl<sub>3</sub>

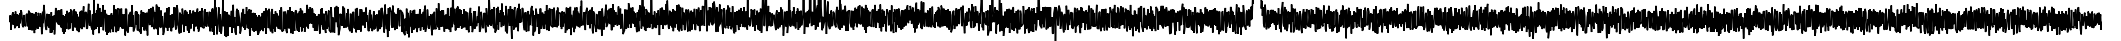

210 200 190 180 170 160 150 140 130 120 110 100 90 80 70 60 50 40 30 20 10 0 -10

f1 (ppm)

S43

400 MHz, CDCl<sub>3</sub>

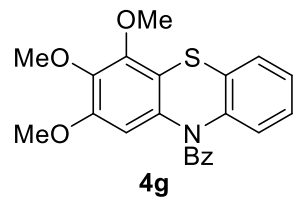

7.47  
7.47  
7.45  
7.45  
7.38  
7.36  
7.36  
7.33  
7.33  
7.33  
7.32  
7.31  
7.31  
7.30  
7.29  
7.29  
7.28  
7.28  
7.28  
7.26 CDCl<sub>3</sub>  
7.24  
7.23  
7.21  
7.16  
7.16  
7.14  
7.14  
7.12  
7.12  
7.12  
7.10  
7.10  
7.08  
7.08  
6.86

3.98  
3.85  
3.69

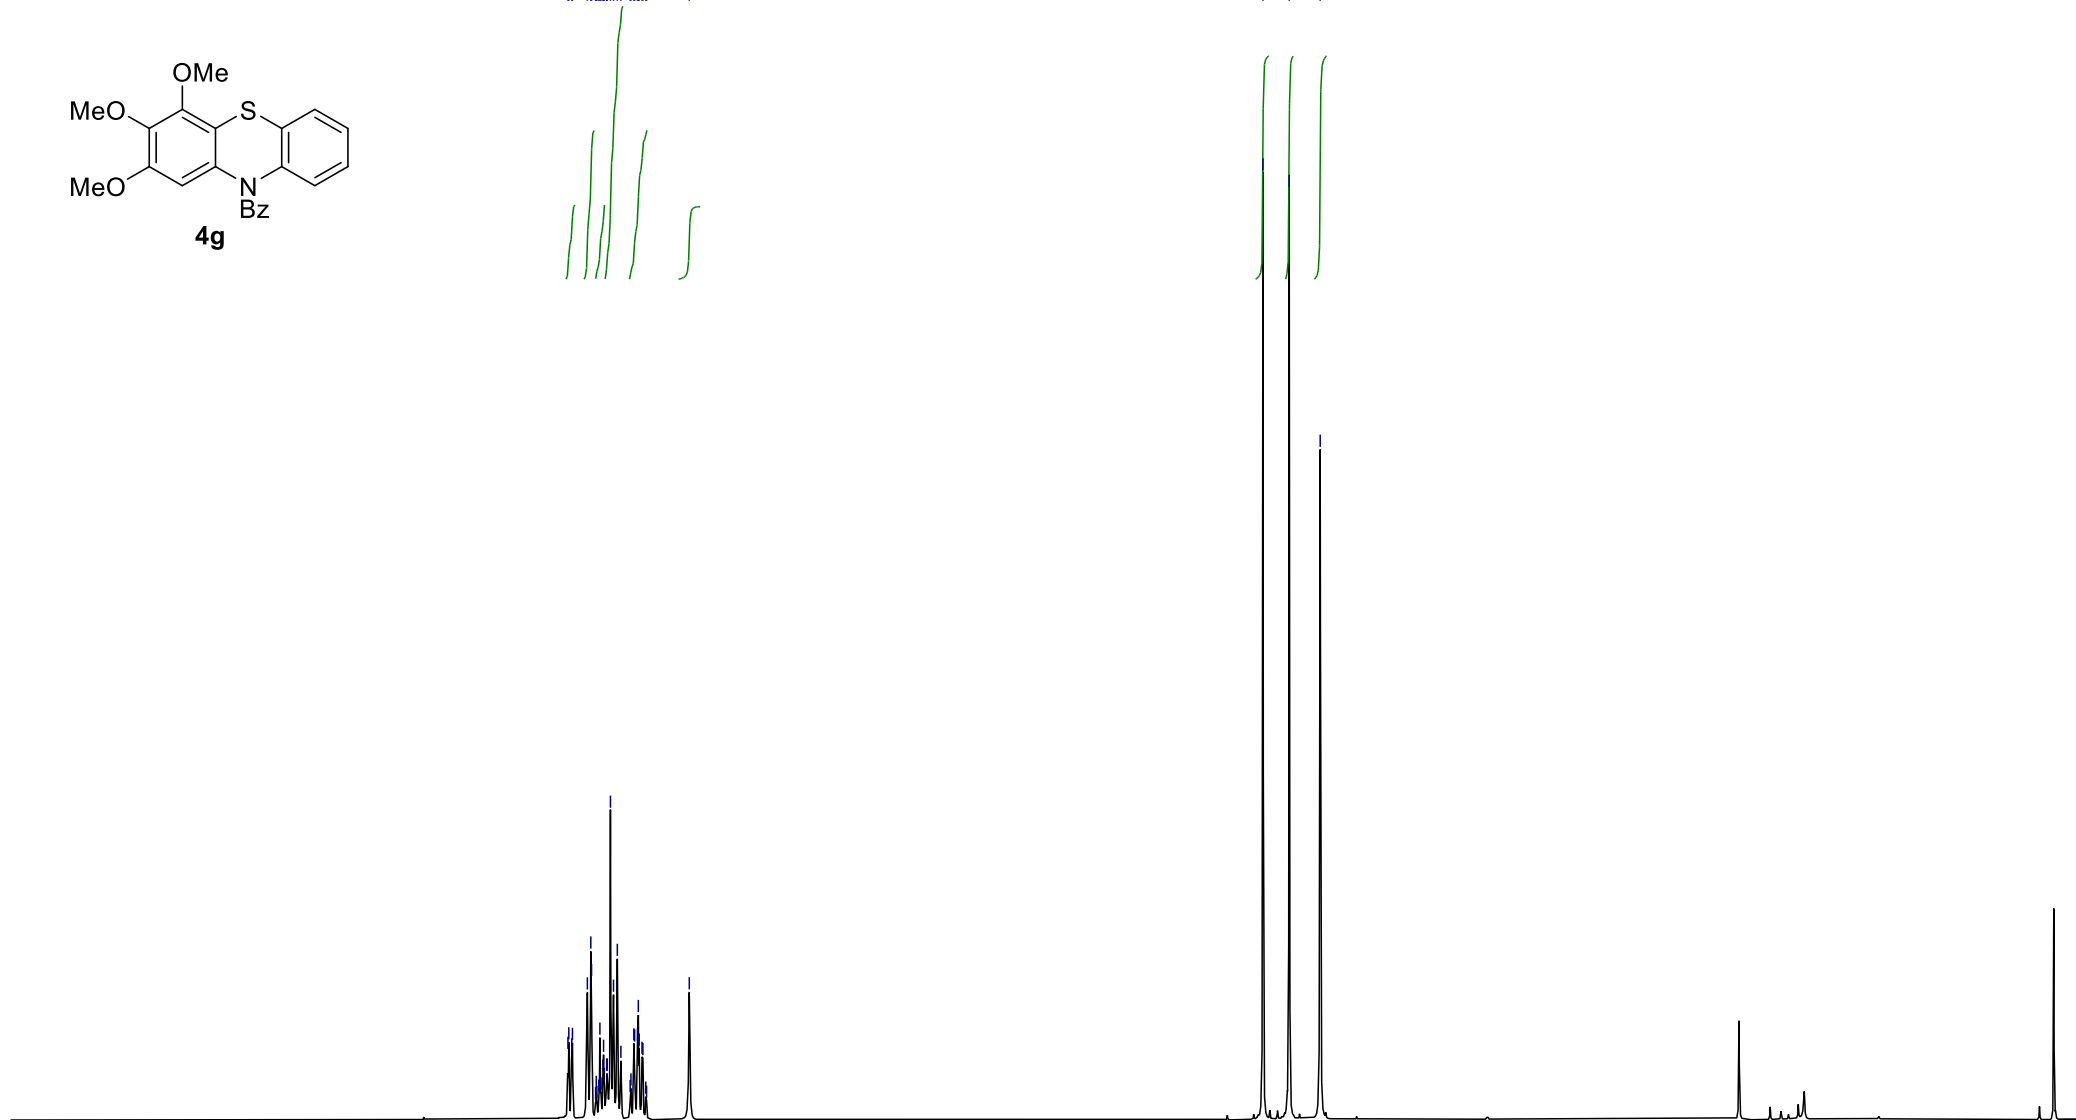

1.00  
2.00  
1.00  
3.66  
2.00  
0.97

3.00  
3.00  
3.00

10.0 9.5 9.0 8.5 8.0 7.5 7.0 6.5 6.0 5.5 5.0 4.5 4.0 3.5 3.0 2.5 2.0 1.5 1.0 0.5 0.0

101 MHz, CDCl<sub>3</sub>

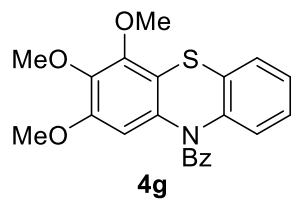

169.15  
152.46  
149.61  
140.84  
139.72  
135.53  
134.67  
132.50  
130.45  
128.75  
128.14  
127.95  
127.13  
126.88  
126.48  
117.95  
107.51  
77.16 CDCl<sub>3</sub>  
61.43  
61.30  
56.37

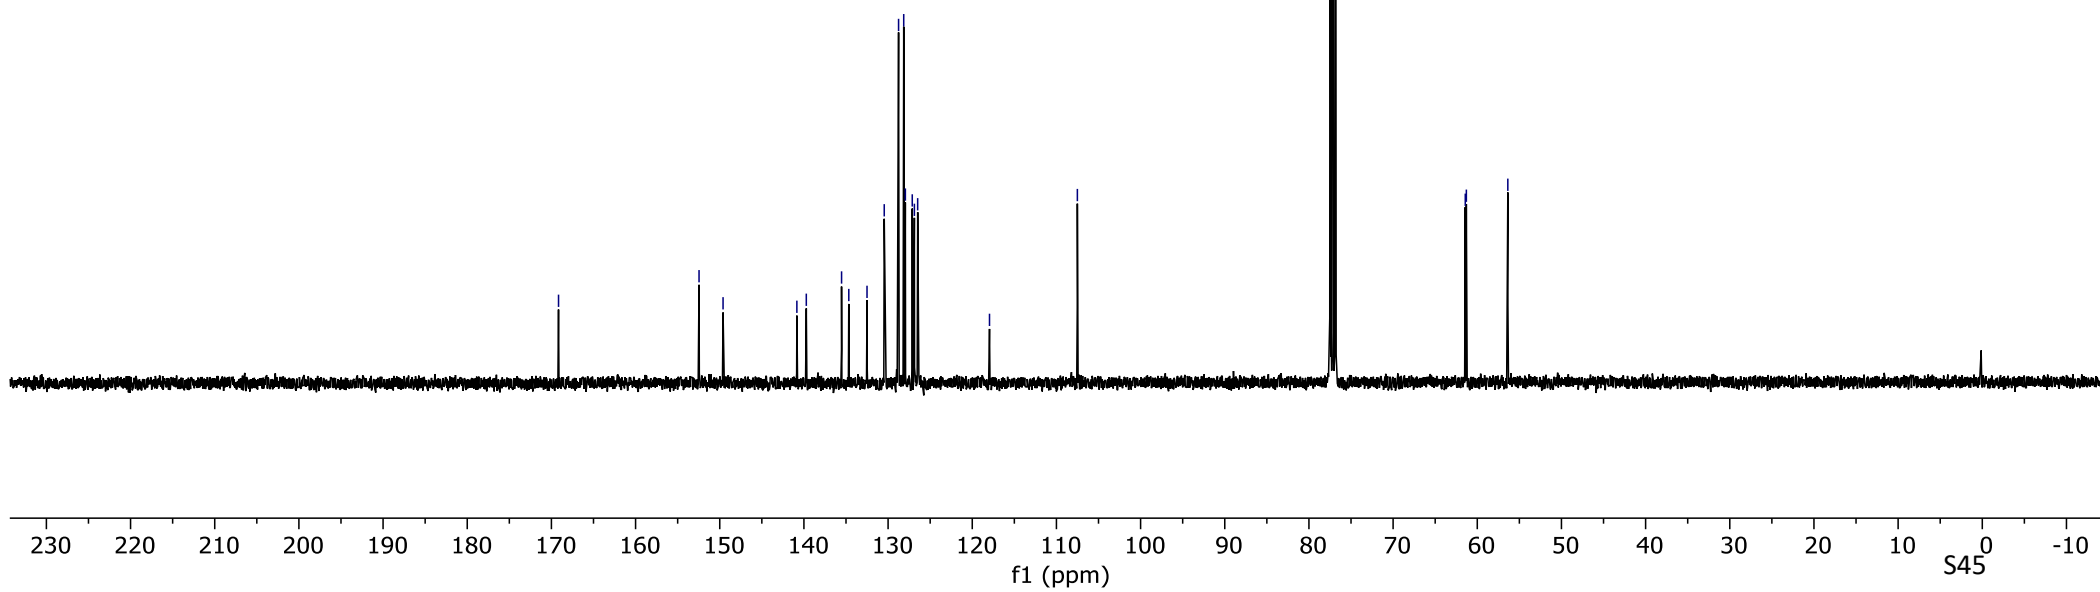

400 MHz, CDCl<sub>3</sub>

7.55  
7.55  
7.53  
7.53  
7.43  
7.41  
7.38  
7.37  
7.36  
7.35  
7.35  
7.34  
7.34  
7.32  
7.32  
7.31  
7.30  
7.30  
7.29  
7.29  
7.27  
7.27  
7.26 CDCl<sub>3</sub>  
7.25  
7.25  
7.19  
7.19  
7.18  
7.18  
7.17  
7.17  
7.15  
7.15  
7.09  
7.09  
7.07  
7.07  
5.26

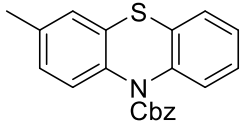

4h

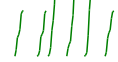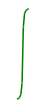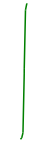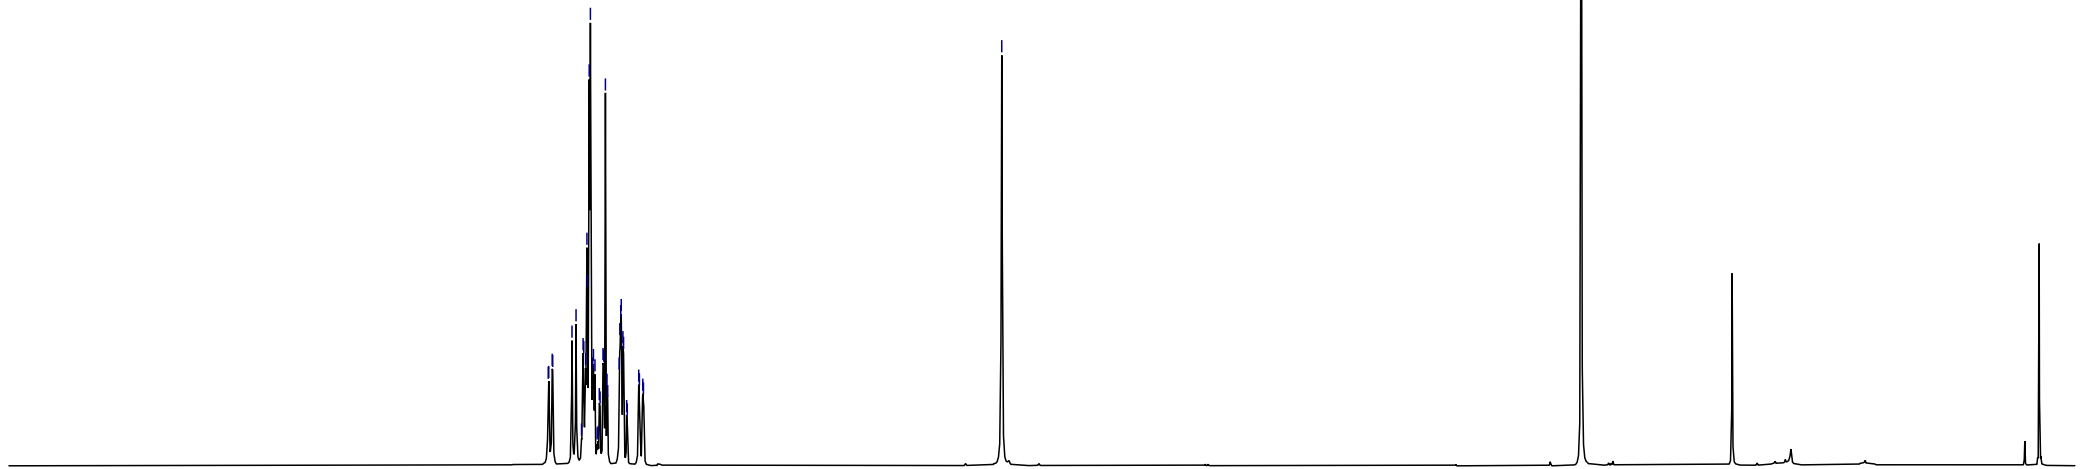

1.01  
1.01  
6.03  
1.79  
2.04  
1.00

2.01

3.01

10.0 9.5 9.0 8.5 8.0 7.5 7.0 6.5 6.0 5.5 5.0 4.5 4.0 3.5 3.0 2.5 2.0 1.5 1.0 0.5 0.0

f1 (ppm)

S46

101 MHz, CDCl<sub>3</sub>

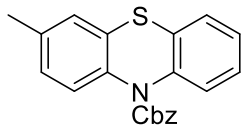

4h

153.81  
138.59  
136.58  
136.13  
135.81  
132.38  
132.02  
128.64  
128.22  
127.97  
127.92  
127.80  
127.66  
127.14  
126.85  
126.76  
126.47

77.16 CDCl<sub>3</sub>

68.13

20.99

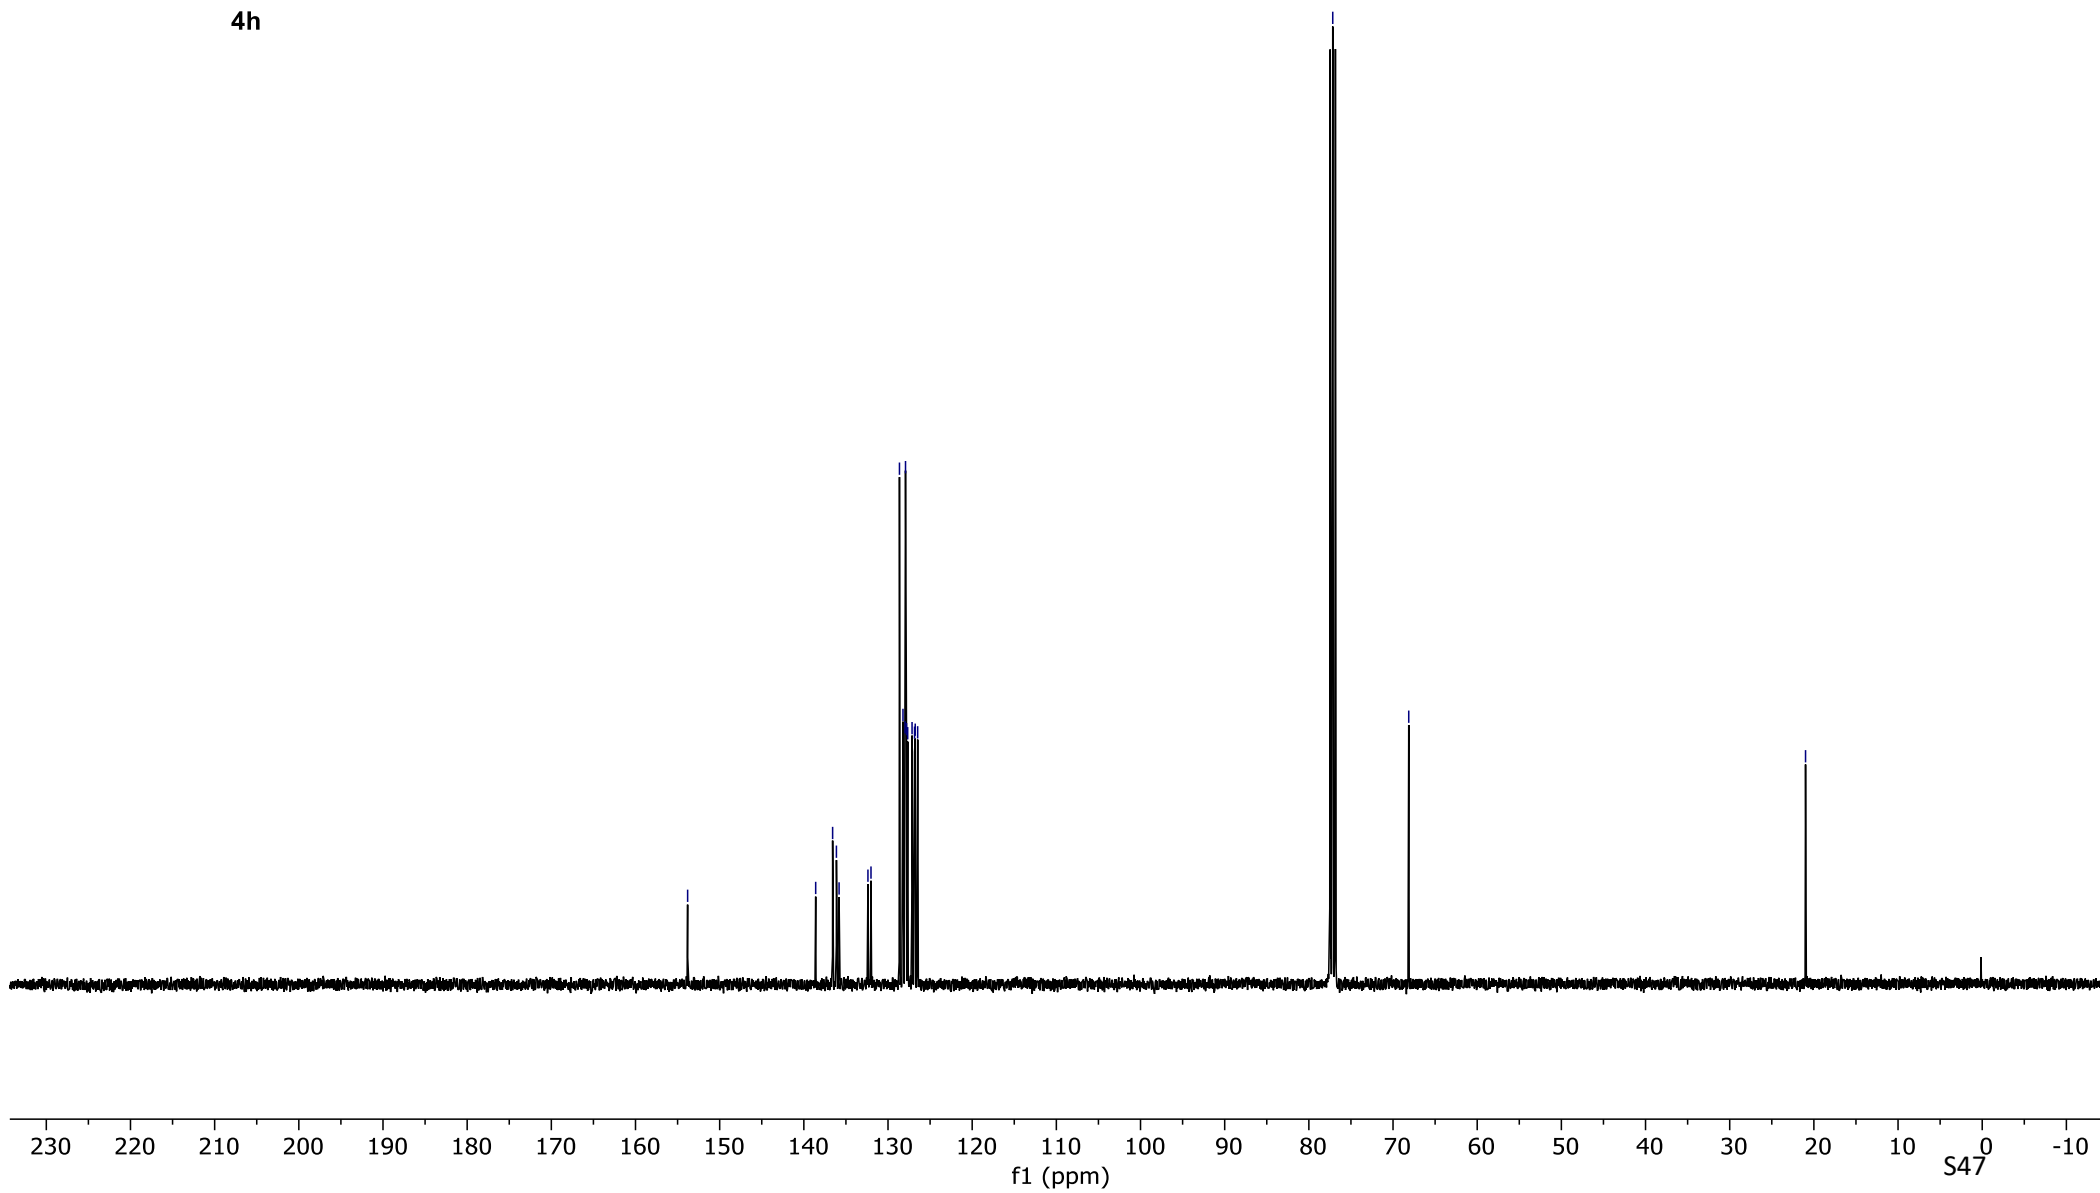

400 MHz, CDCl<sub>3</sub>

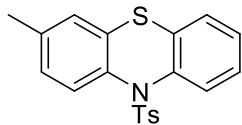

4i

7.75  
7.74  
7.73  
7.72  
7.62  
7.60  
7.34  
7.33  
7.32  
7.32  
7.31  
7.31  
7.30  
7.29  
7.26 CDCl<sub>3</sub>  
7.22  
7.22  
7.20  
7.20  
7.19  
7.18  
7.15  
7.14  
7.14  
7.13  
7.13  
7.12  
7.12  
7.11  
7.11  
7.09  
7.09  
7.06  
7.05  
7.03  
7.03  
6.92  
6.92

2.37  
2.32

1.01  
1.00  
1.03  
1.03  
4.04  
2.04  
1.00

3.04  
3.03

10.0 9.5 9.0 8.5 8.0 7.5 7.0 6.5 6.0 5.5 5.0 4.5 4.0 3.5 3.0 2.5 2.0 1.5 1.0 0.5 0.0

f1 (ppm)

S48



101 MHz, CDCl<sub>3</sub>

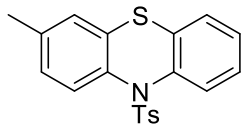

4i

144.10  
137.96  
136.25  
136.20  
133.45  
133.31  
132.78  
130.10  
129.78  
129.38  
128.21  
127.81  
127.69  
127.34  
127.20  
126.98

77.16 CDCl<sub>3</sub>

21.77  
21.08

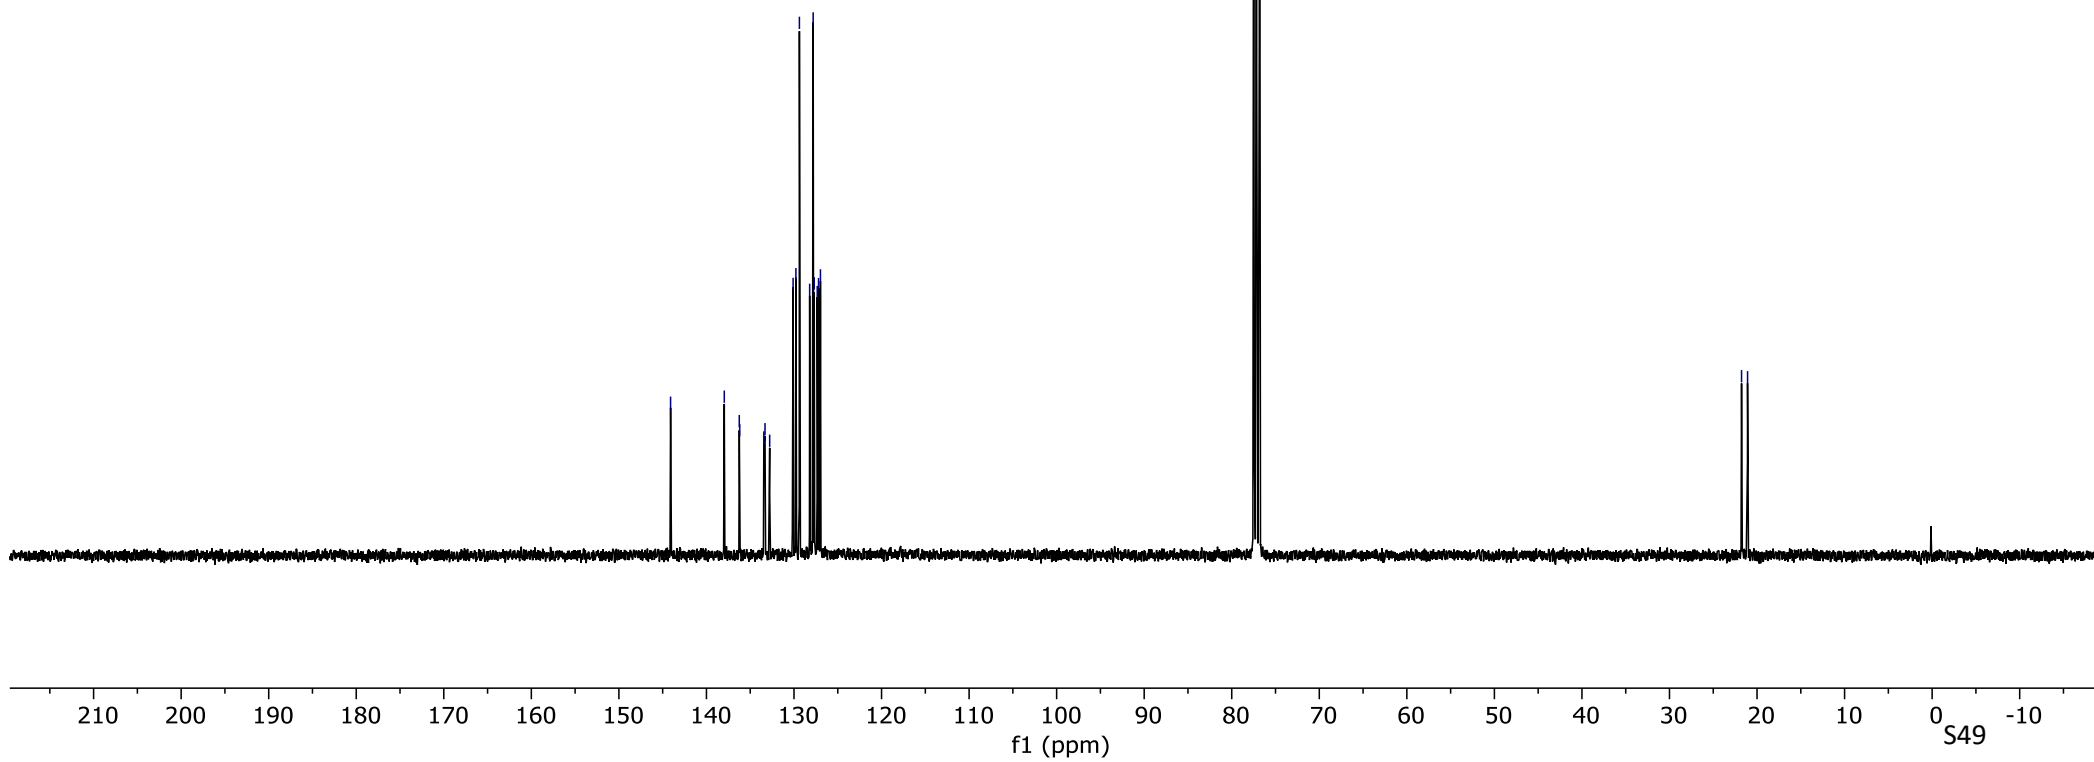

400 MHz, CDCl<sub>3</sub>

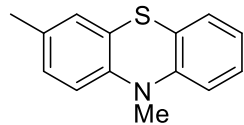

4j

7.26 CDCl<sub>3</sub>  
7.19  
7.18  
7.17  
7.17  
7.16  
7.16  
7.16  
7.15  
7.14  
7.14  
7.14  
6.98  
6.98  
6.96  
6.96  
6.96  
6.94  
6.93  
6.92  
6.92  
6.90  
6.90  
6.81  
6.81  
6.79  
6.72  
6.70

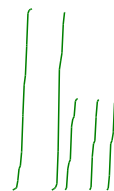

1.99  
1.96  
1.01  
1.00  
1.00

3.00

3.01

3.35

2.26

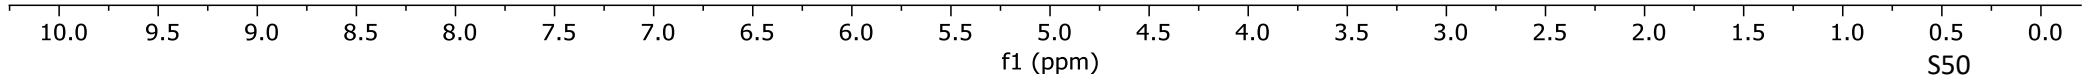

S50

101 MHz, CDCl<sub>3</sub>

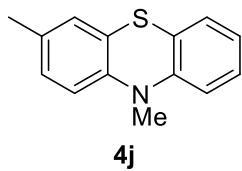

146.20  
143.53  
132.11  
128.01  
127.80  
127.47  
127.25  
123.47  
123.34  
122.29  
113.98  
113.97

77.16 CDCl<sub>3</sub>

35.35

20.42

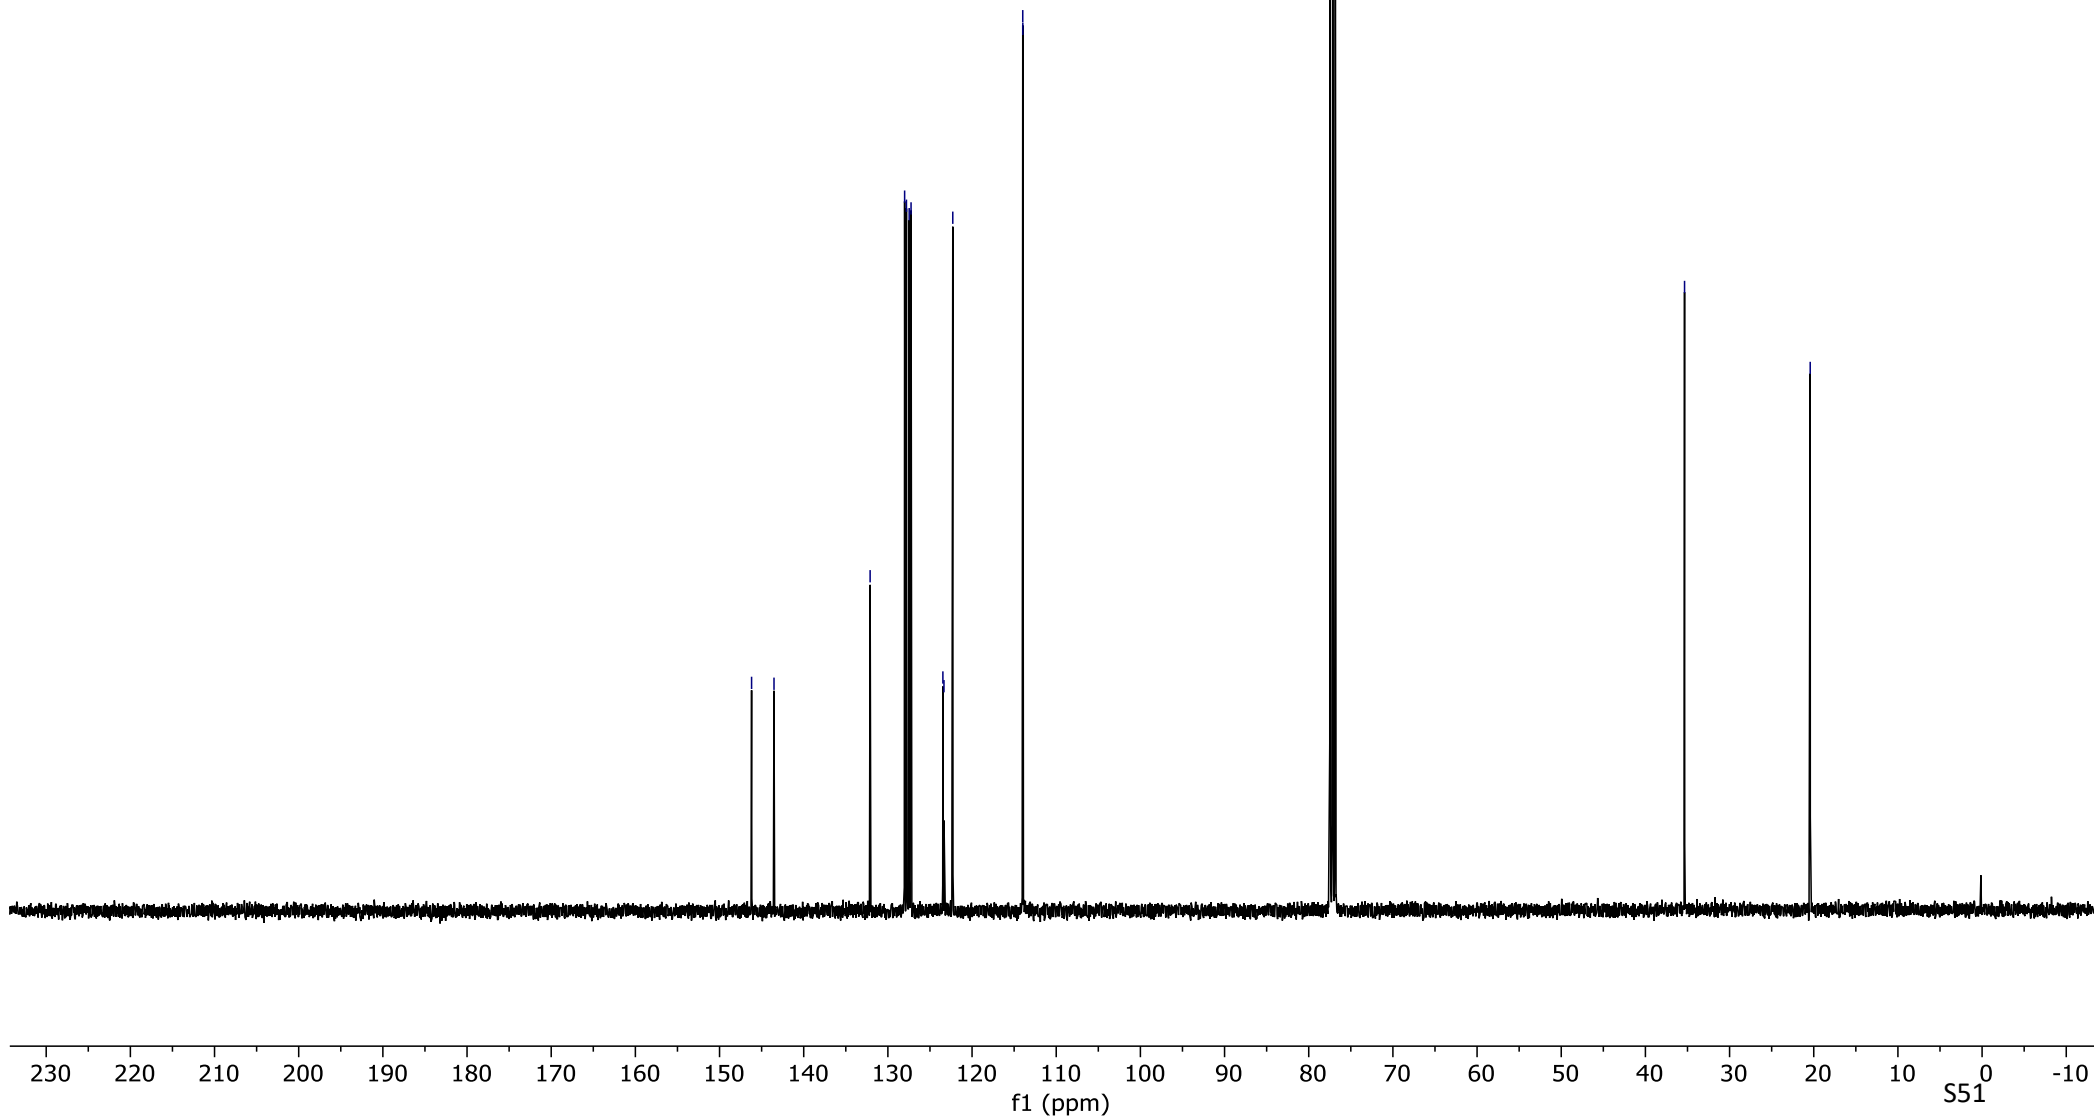

400 MHz, CDCl<sub>3</sub>

CDCl<sub>3</sub>

7.34  
7.33  
7.33  
7.32  
7.31  
7.30  
7.27  
7.26  
7.10  
7.10  
7.08  
7.08  
6.99  
6.99  
6.97  
6.97  
6.97  
6.95  
6.95  
6.92  
6.92  
6.87  
6.86  
6.85  
6.85  
6.83  
6.83  
6.83  
6.78  
6.78  
6.78  
6.78  
6.76  
6.76  
6.76  
6.76  
6.63  
6.61  
6.61  
6.54  
6.52

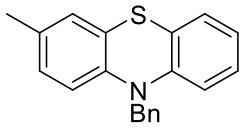

4k

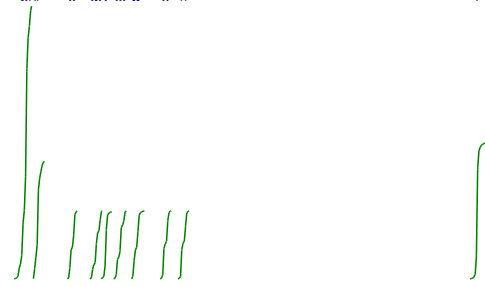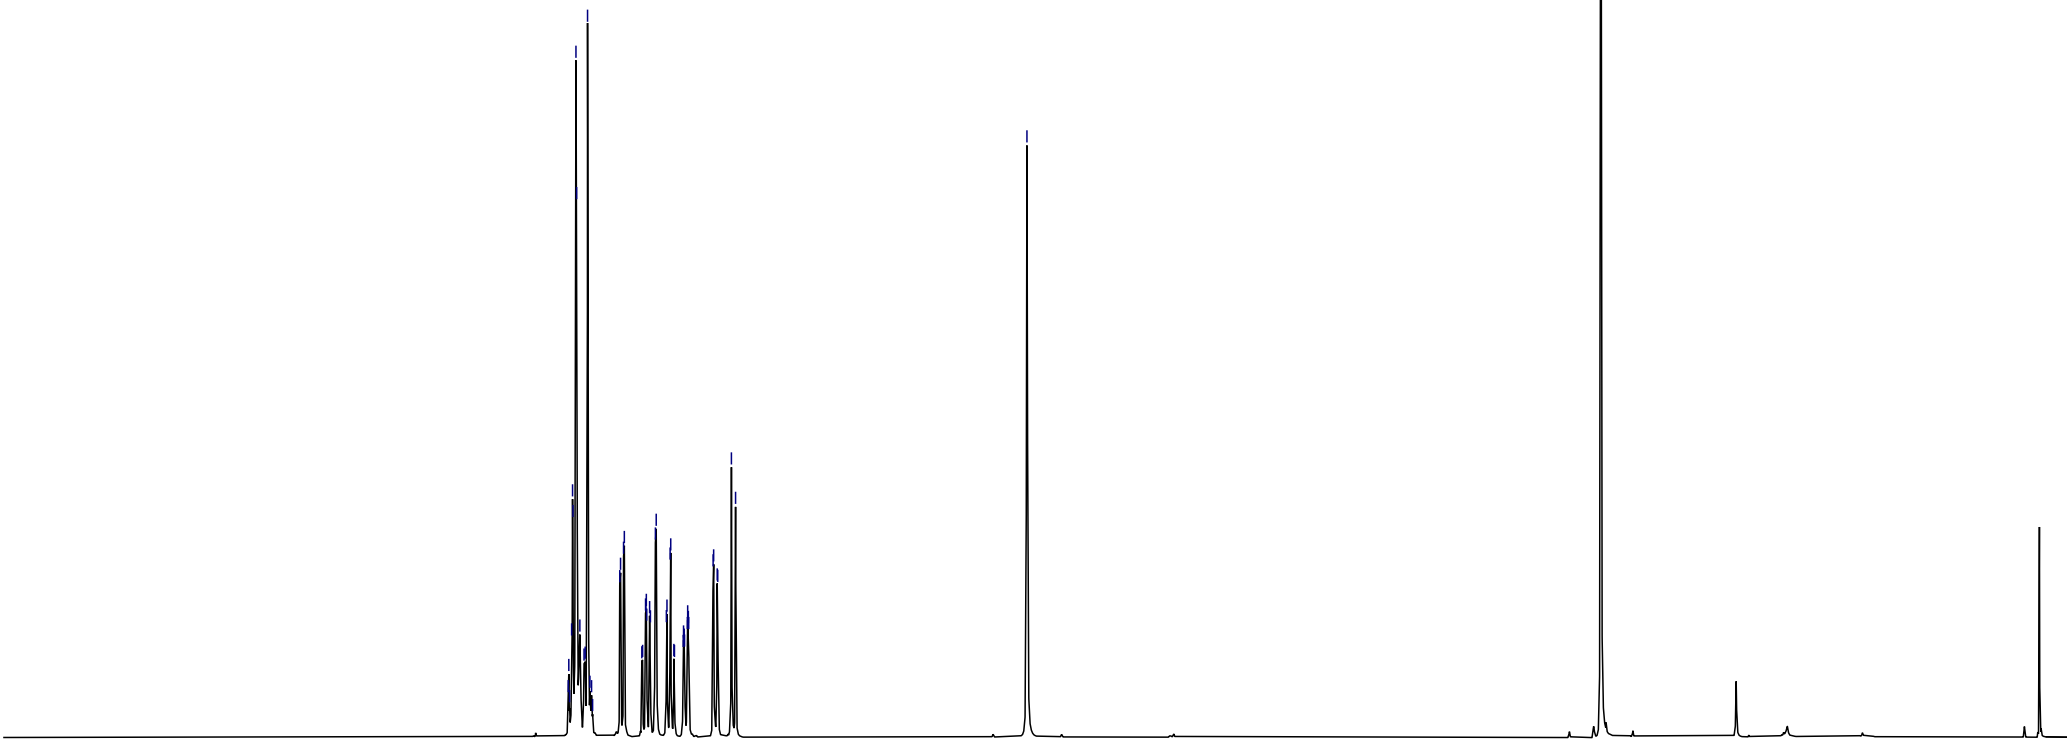

4.00  
1.72  
1.00  
1.00  
0.99  
1.00  
1.00  
1.00  
1.00

1.99

3.00

2.21

10.0 9.5 9.0 8.5 8.0 7.5 7.0 6.5 6.0 5.5 5.0 4.5 4.0 3.5 3.0 2.5 2.0 1.5 1.0 0.5 0.0  
f1 (ppm)

S52

101 MHz, CDCl<sub>3</sub>

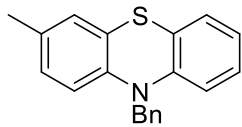

4k

144.80  
142.10  
136.95  
132.17  
128.82  
127.82  
127.44  
127.28  
127.06  
126.92  
126.75  
123.13  
123.04  
122.33  
115.36  
115.34

77.16 CDCl<sub>3</sub>

52.72

20.37

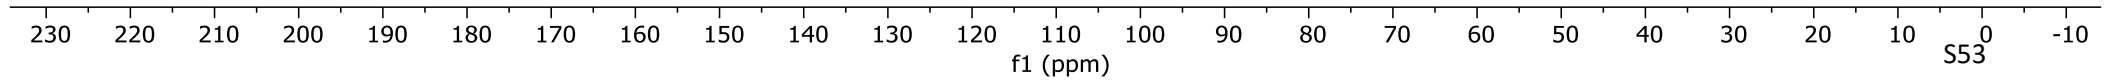

400 MHz, DMSO-d<sub>6</sub>

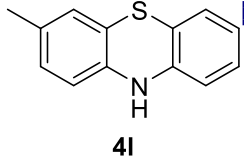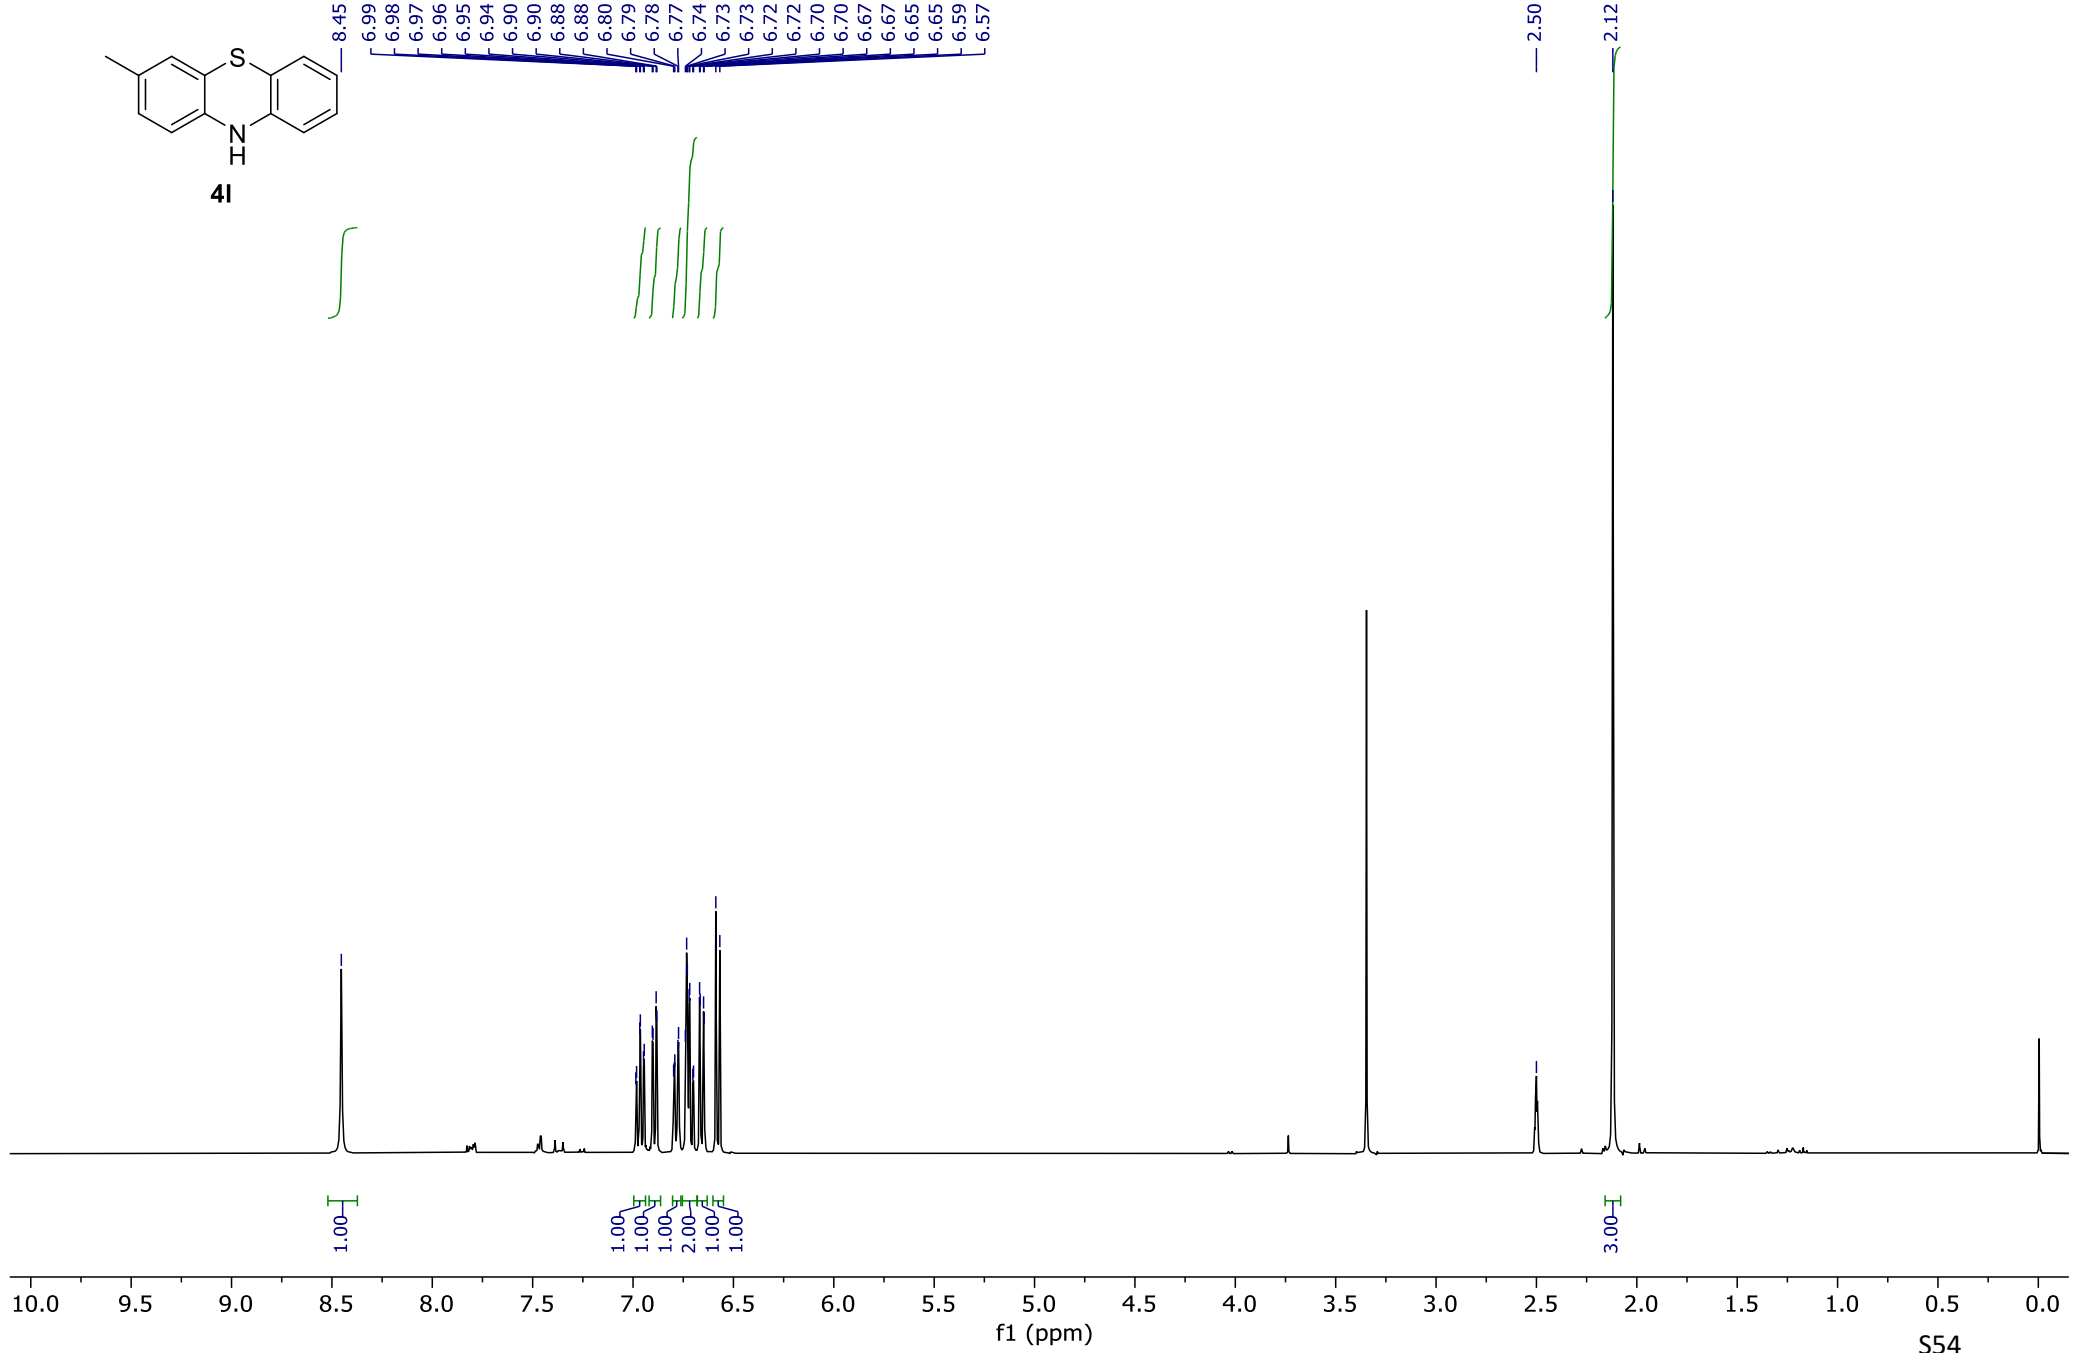

101 MHz, DMSO-d<sub>6</sub>

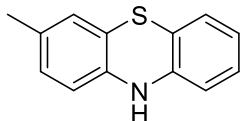

4I

142.36  
139.54  
130.66  
128.99  
127.95  
127.46  
126.46  
126.20  
121.43  
116.24  
116.18  
114.26

39.52 DMSO-d<sub>6</sub>

19.93

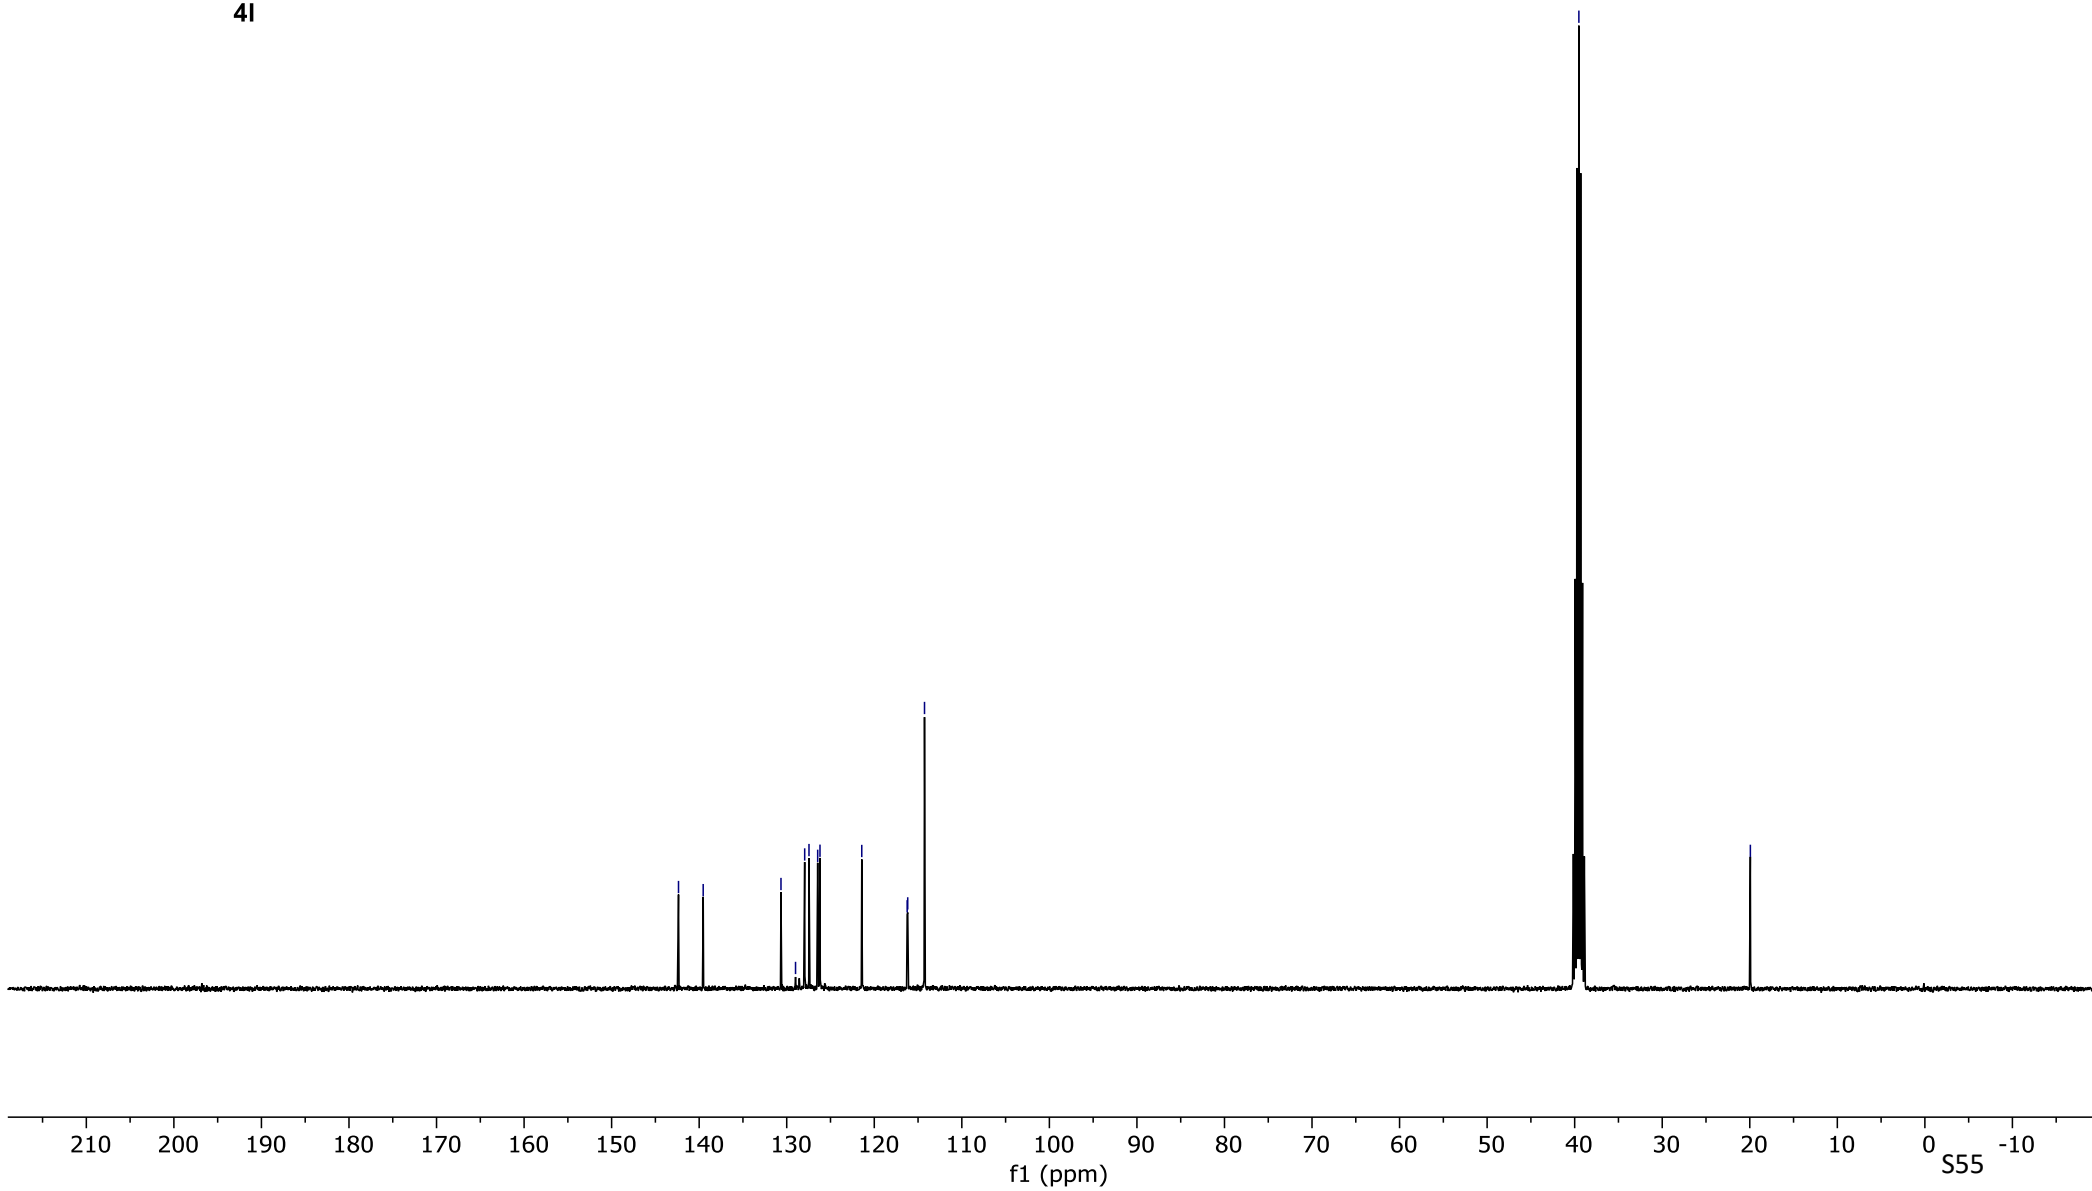

400 MHz, DMSO-d<sub>6</sub>

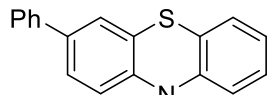

4m

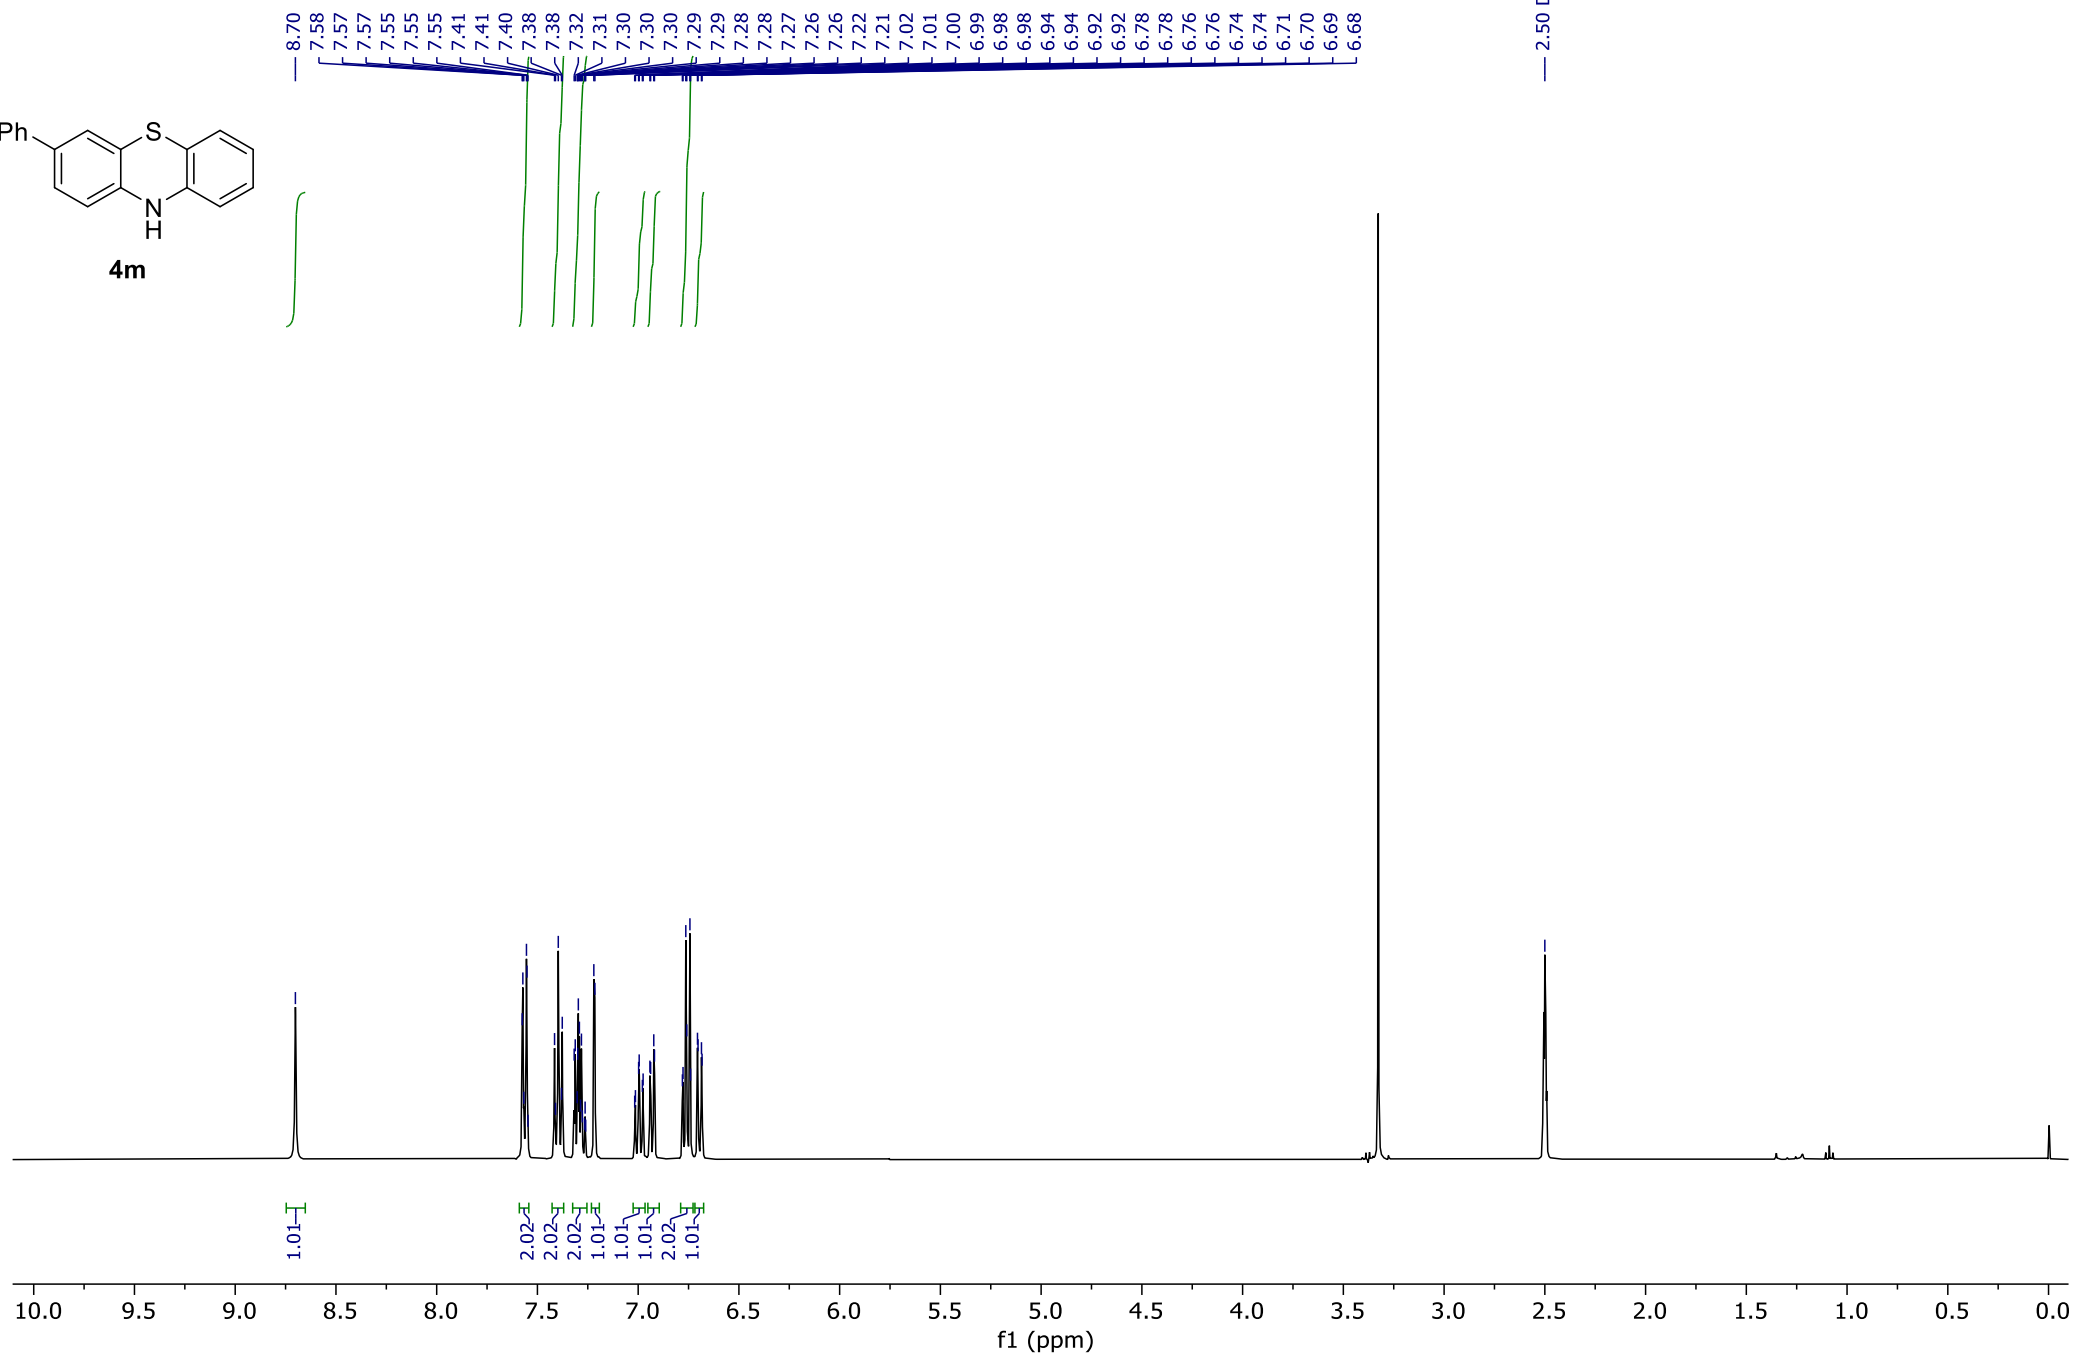



101 MHz, DMSO- $d_6$

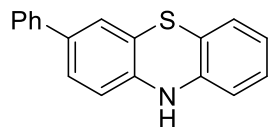

4m

141.65  
141.34  
139.12  
133.69  
128.80  
127.57  
126.77  
126.23  
125.84  
125.70  
124.10  
121.84  
117.01  
116.09  
114.70  
114.45

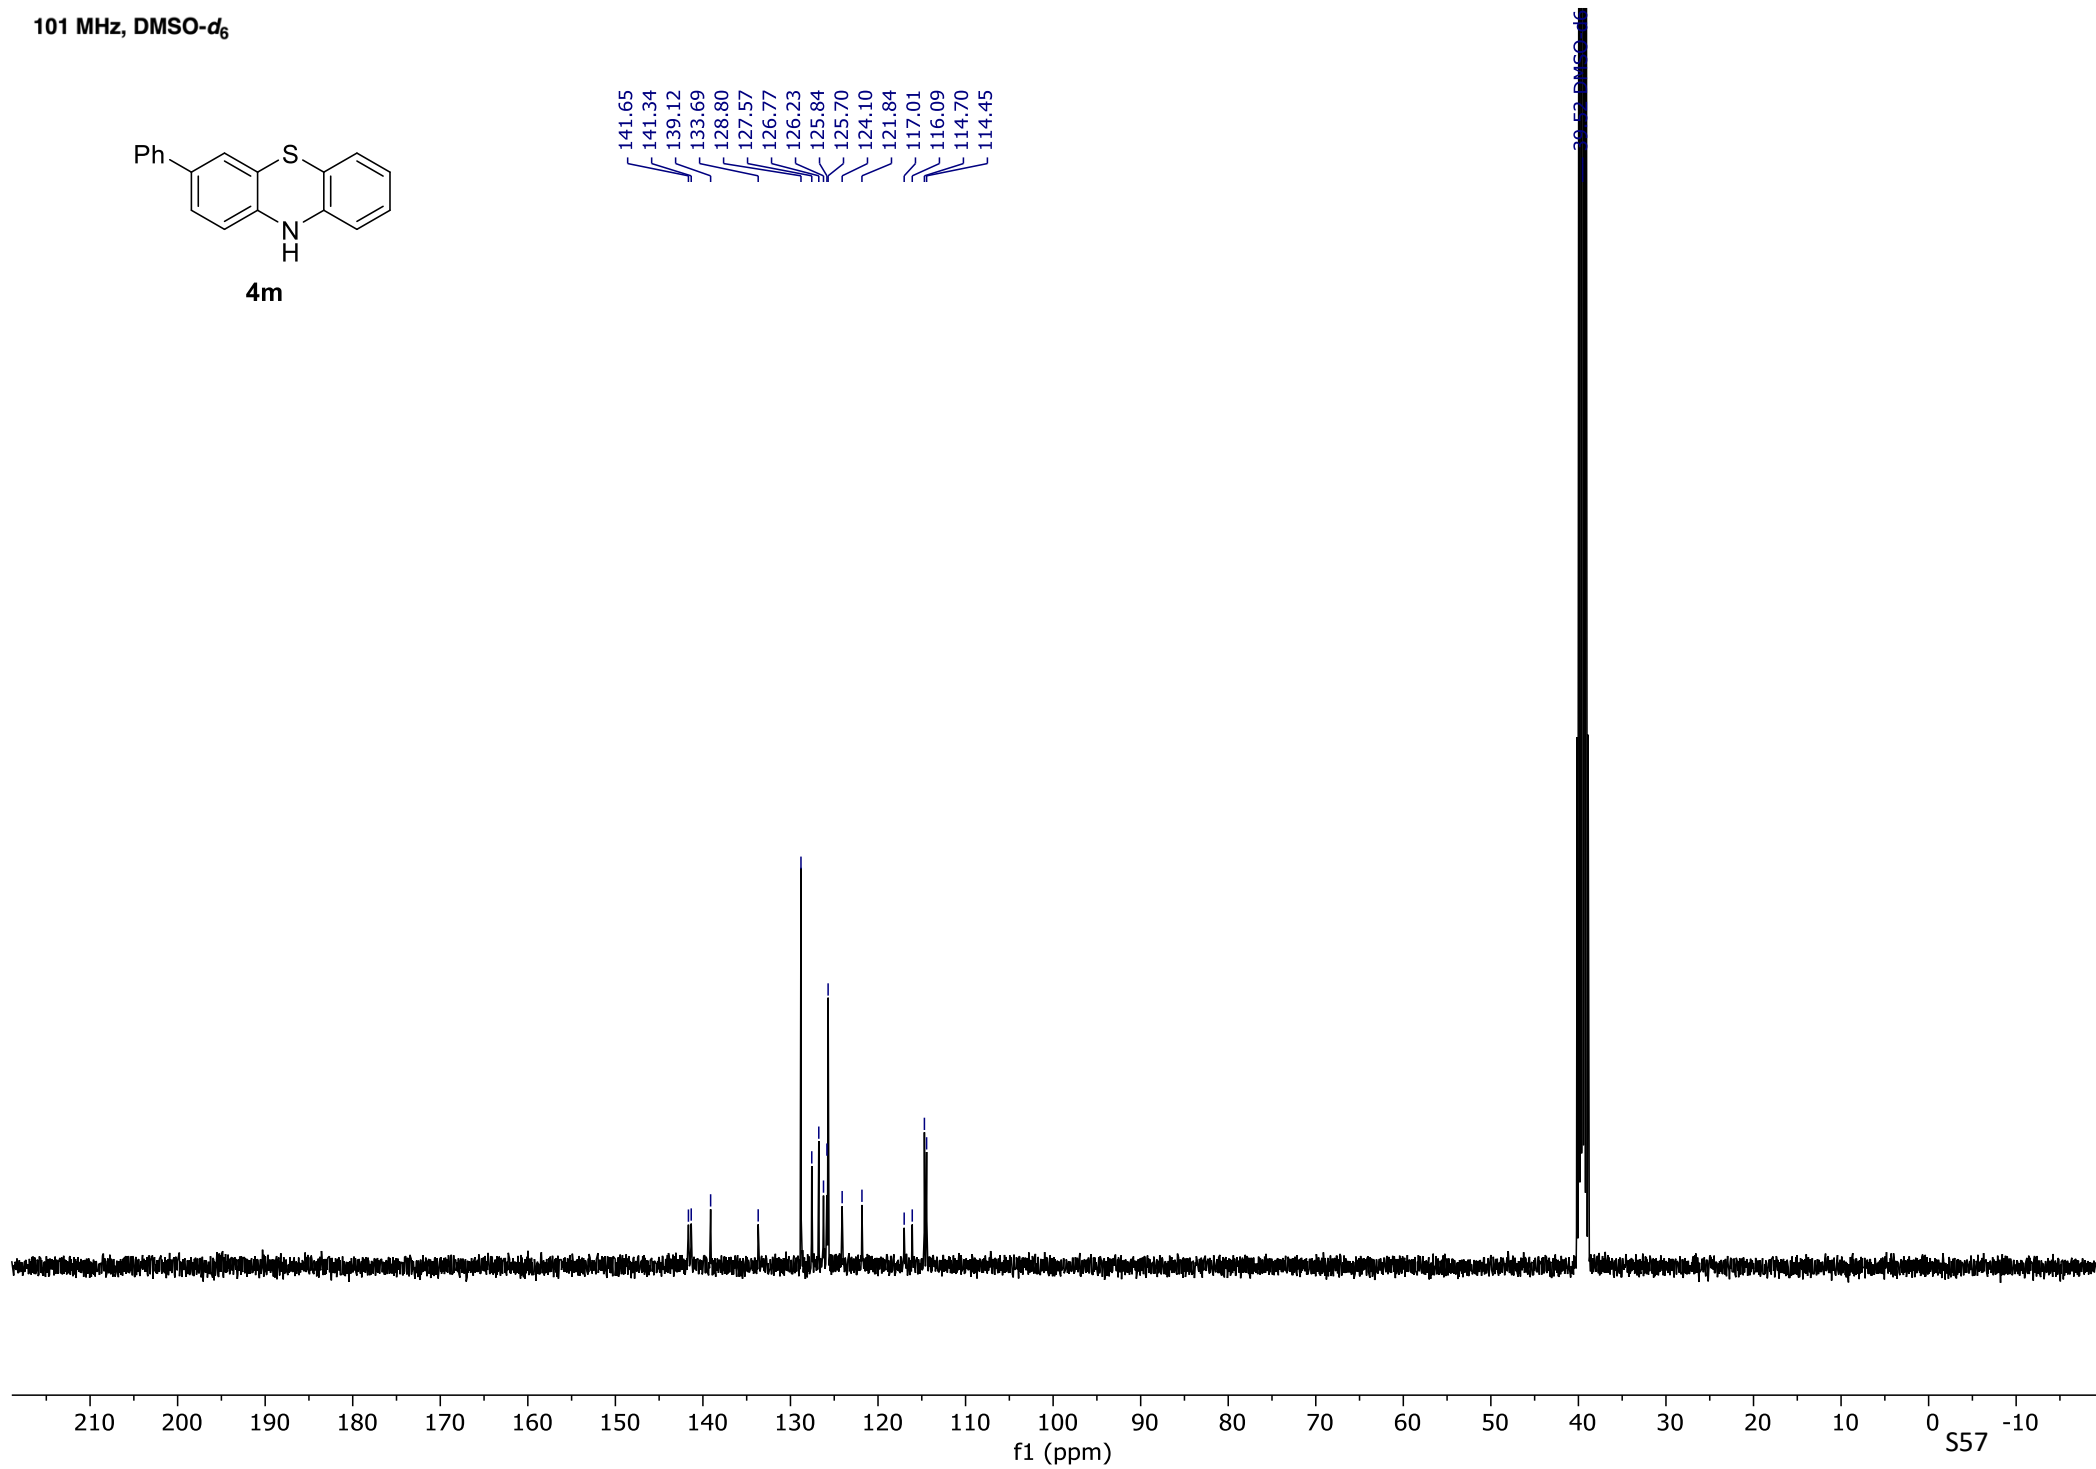

400 MHz, DMSO-d<sub>6</sub>

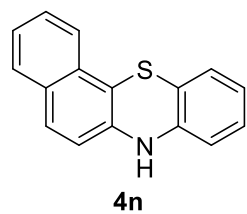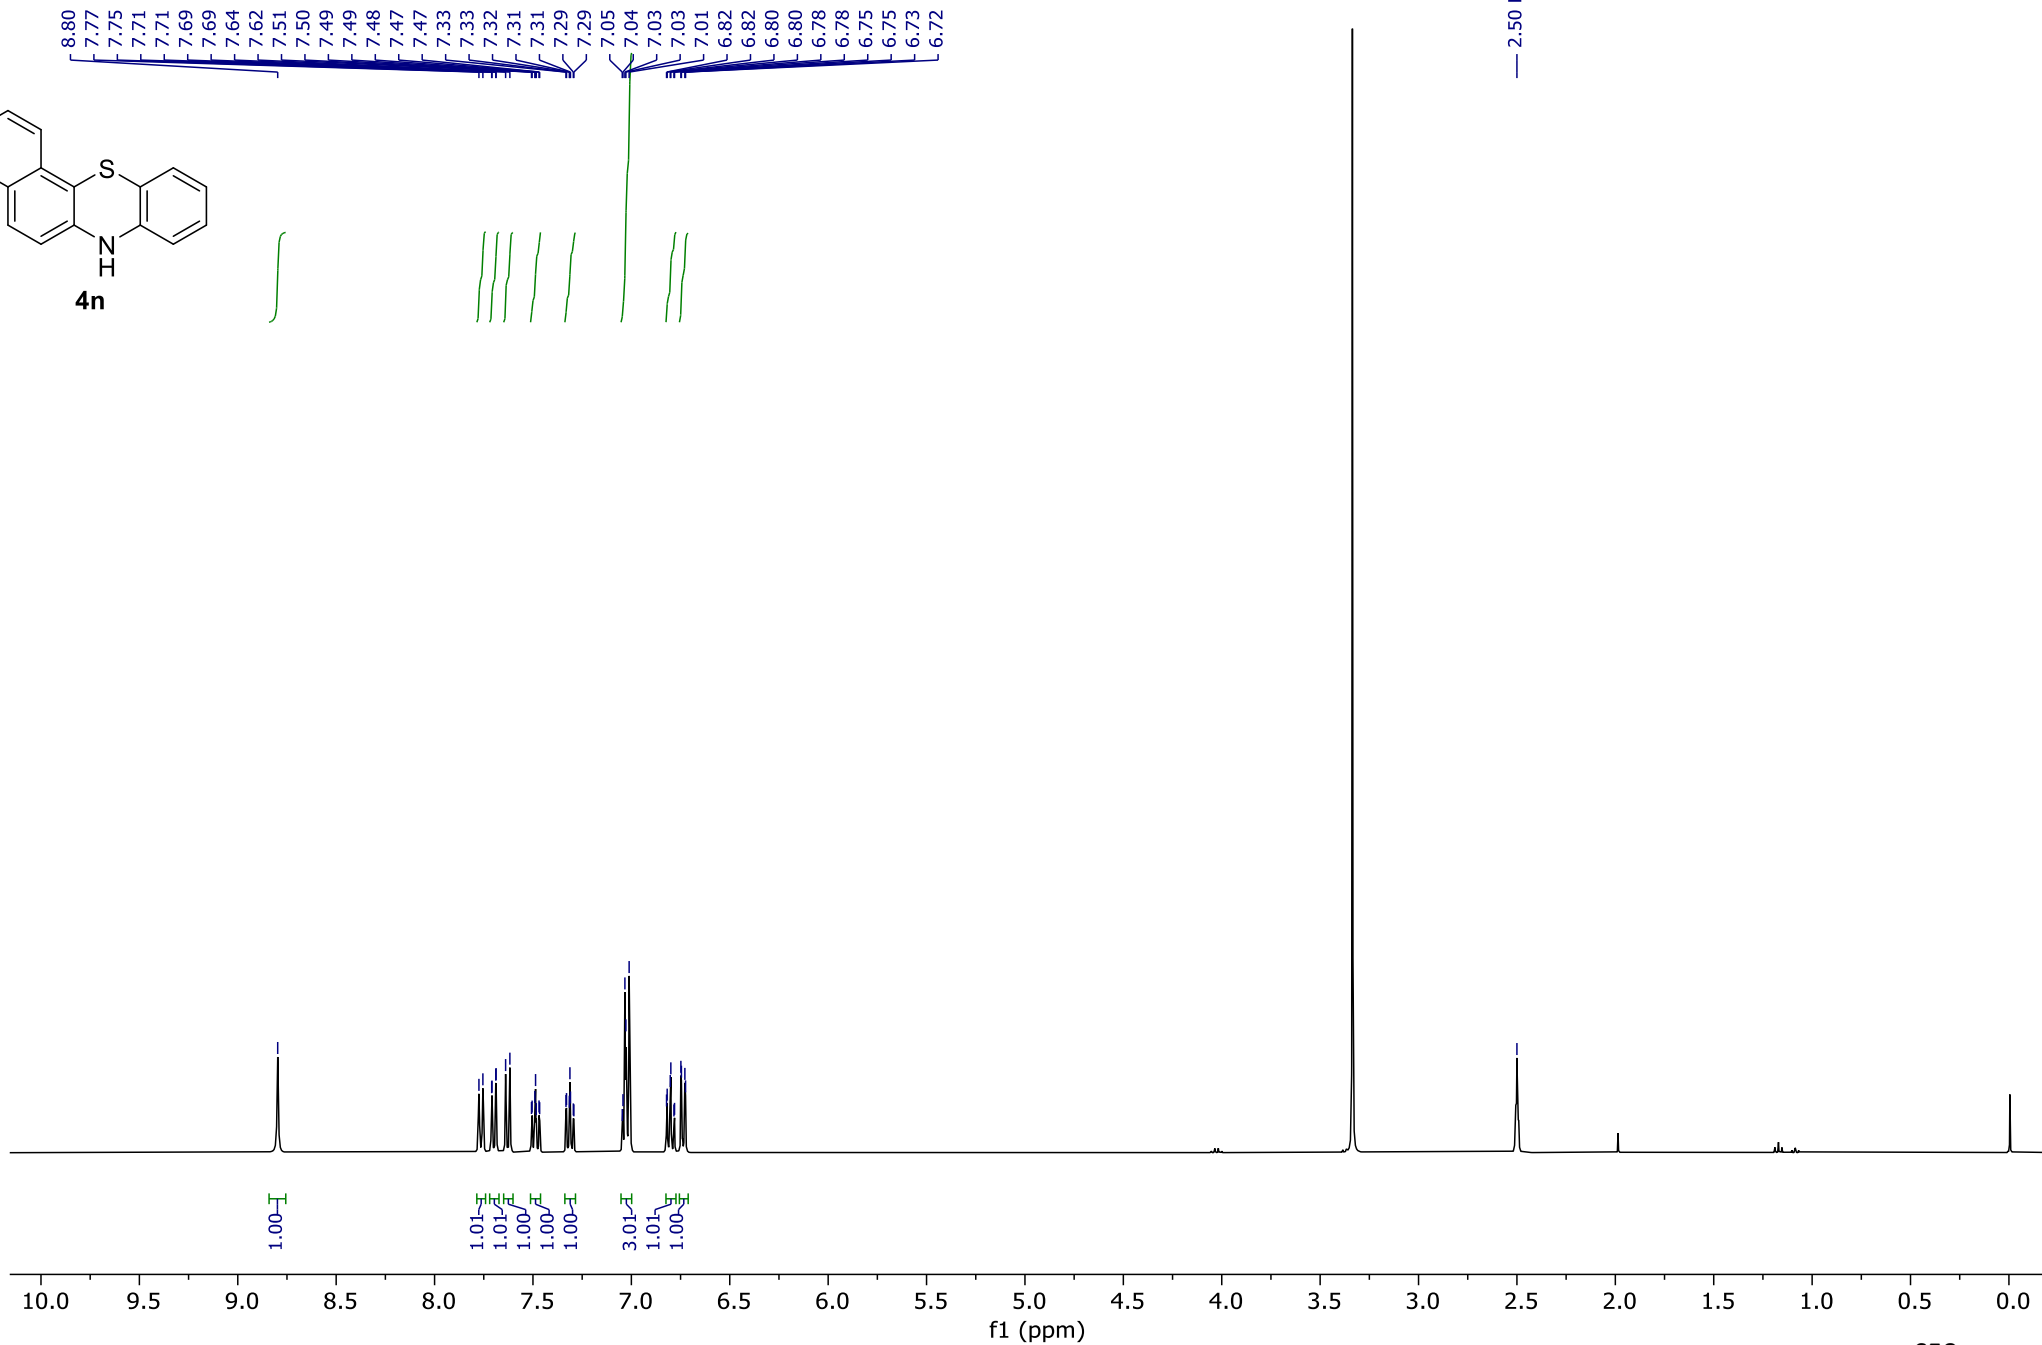

101 MHz, DMSO-d<sub>6</sub>

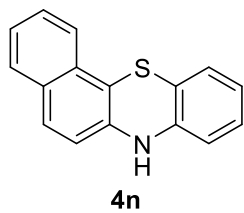

142.43  
139.78  
129.91  
129.62  
128.37  
127.84  
127.43  
127.02  
126.61  
123.26  
122.30  
121.43  
116.79  
116.02  
114.53  
— 107.00

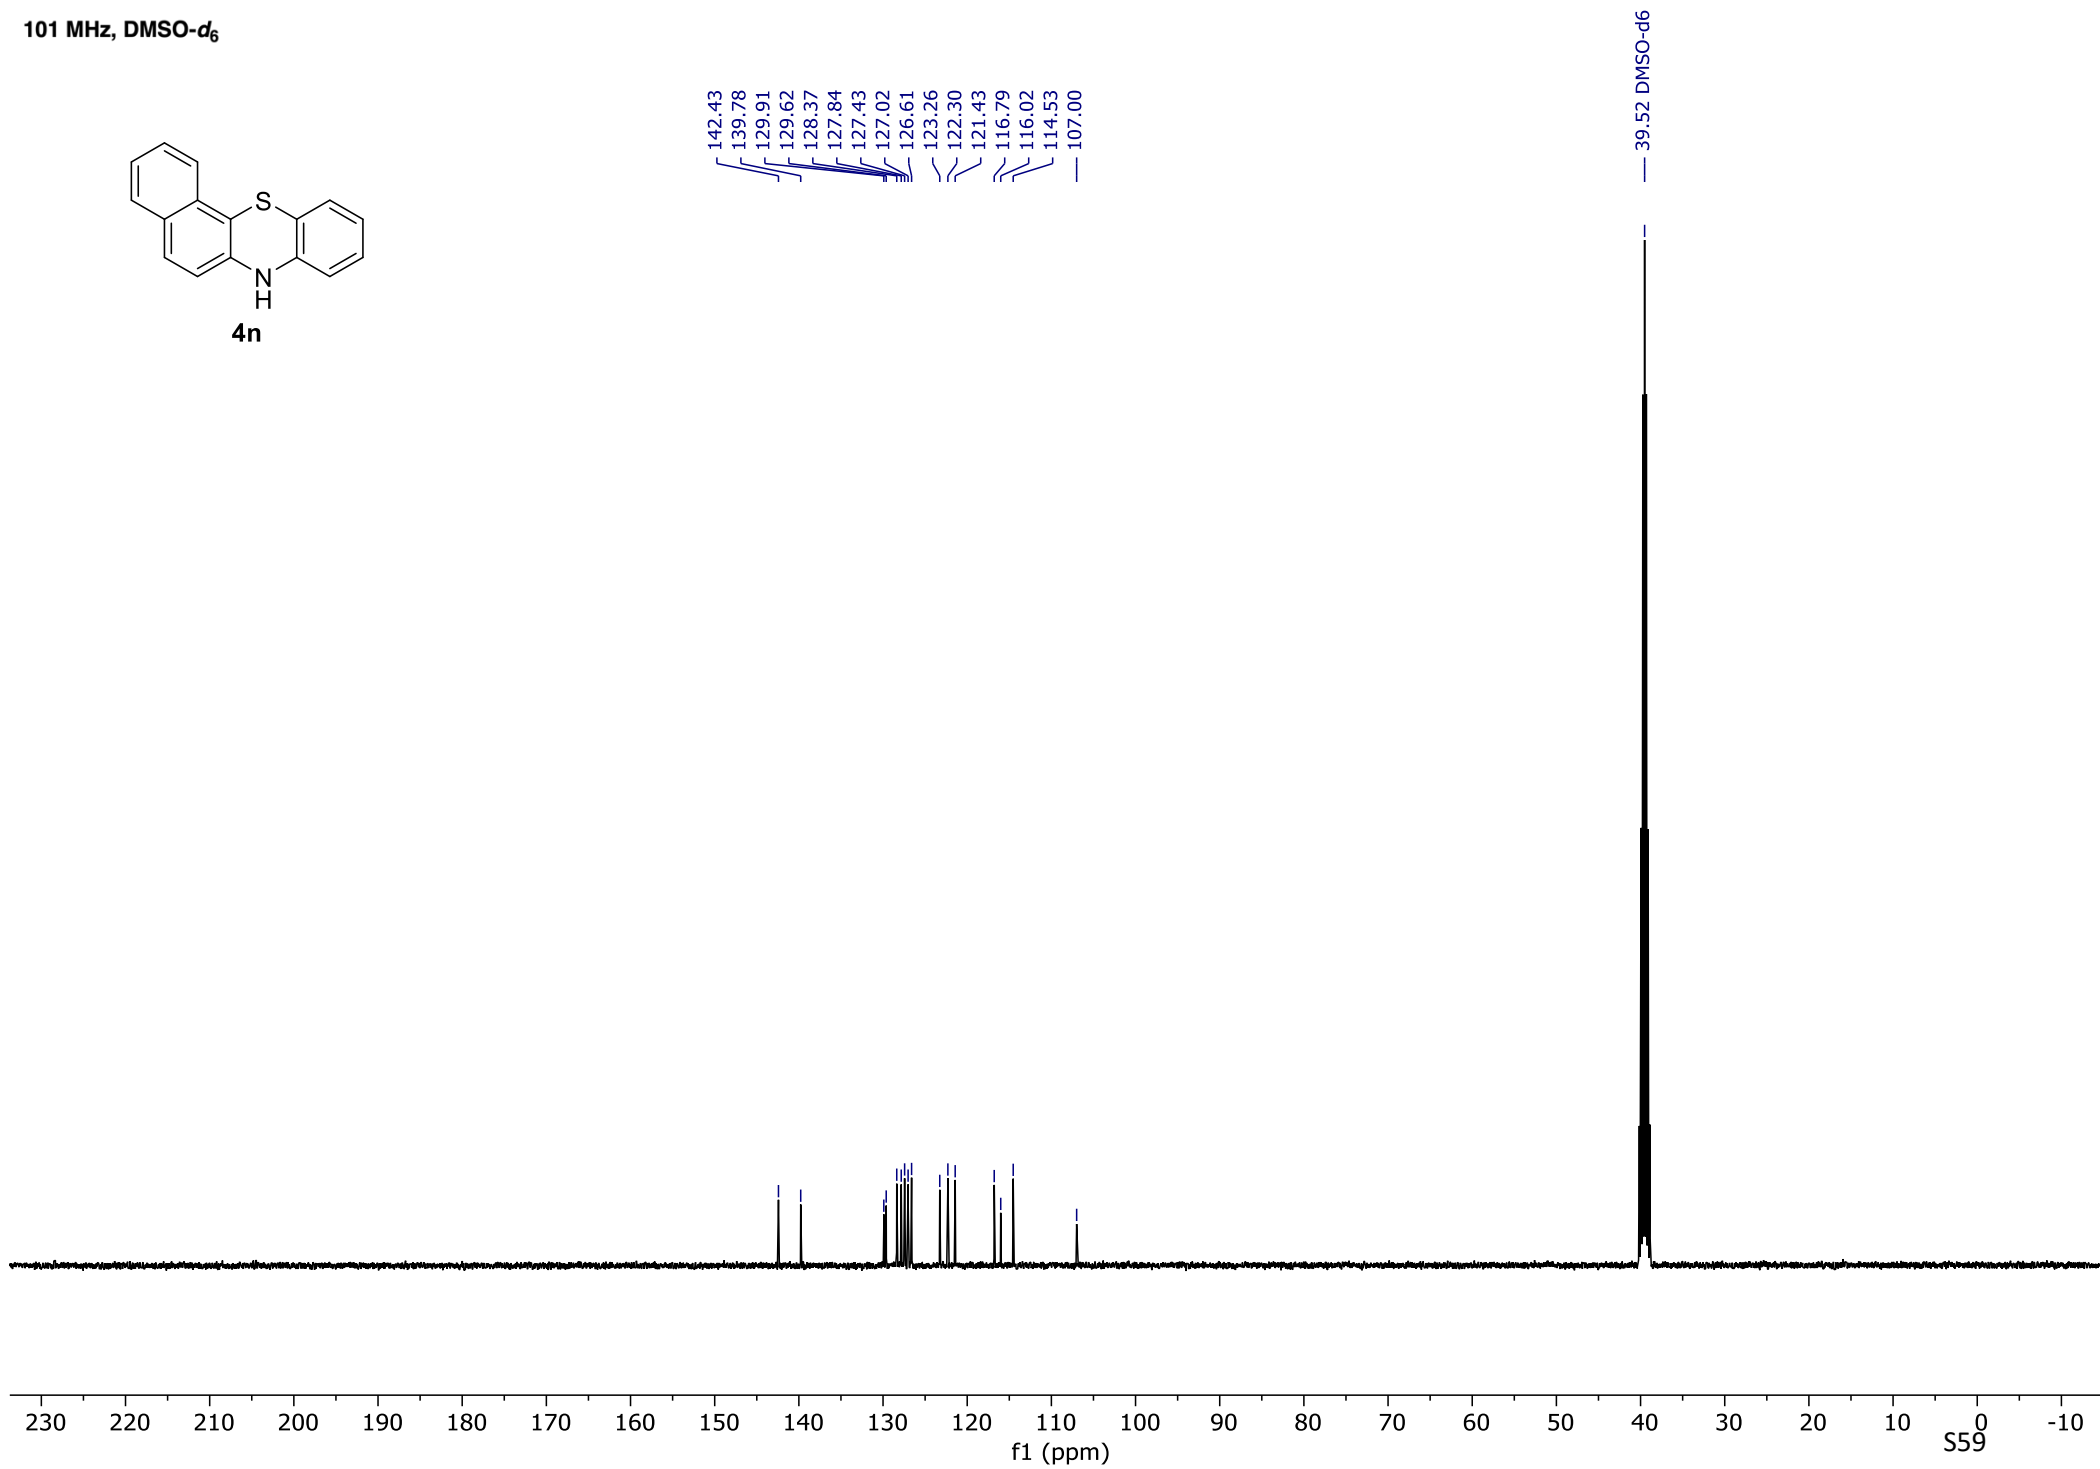

400 MHz, DMSO-d<sub>6</sub>

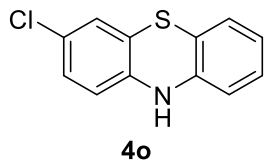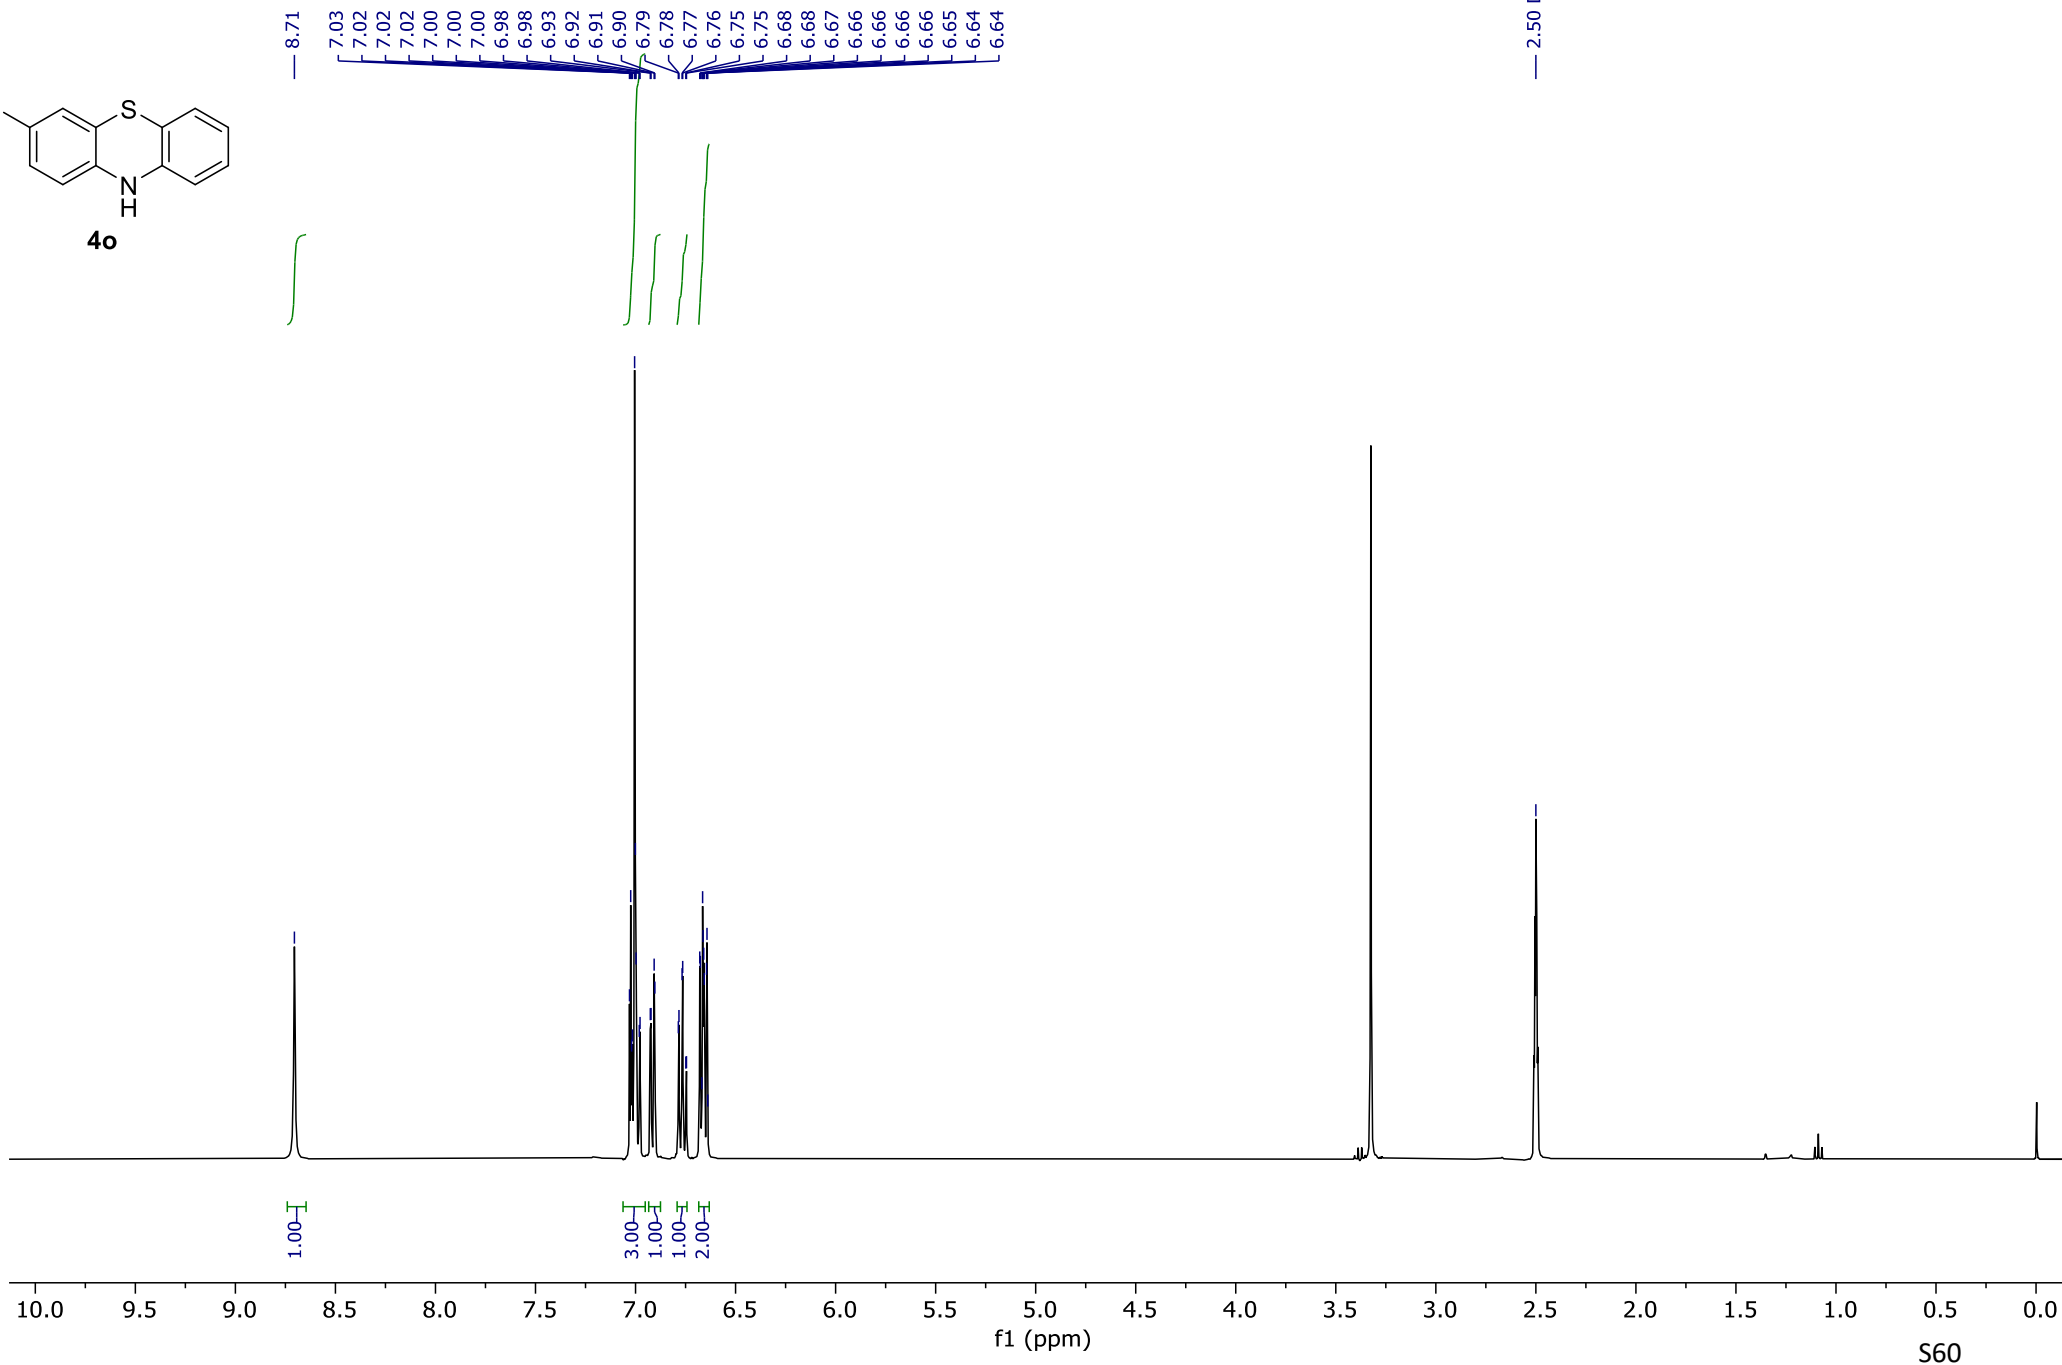

101 MHz, DMSO-d<sub>6</sub>

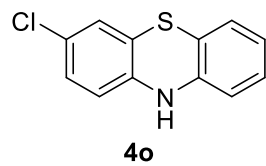

141.58  
141.09  
127.82  
127.21  
126.28  
125.39  
124.94  
122.08  
118.56  
115.49  
115.38  
114.56

39.52-DMSO-d6

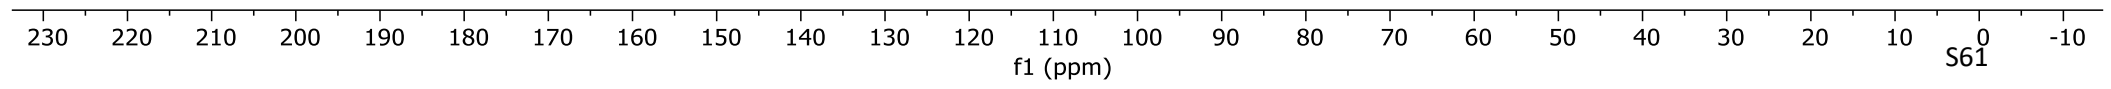

400 MHz, CDCl<sub>3</sub>

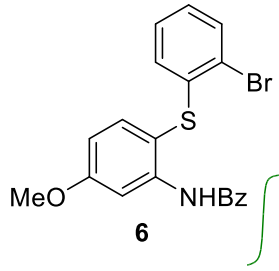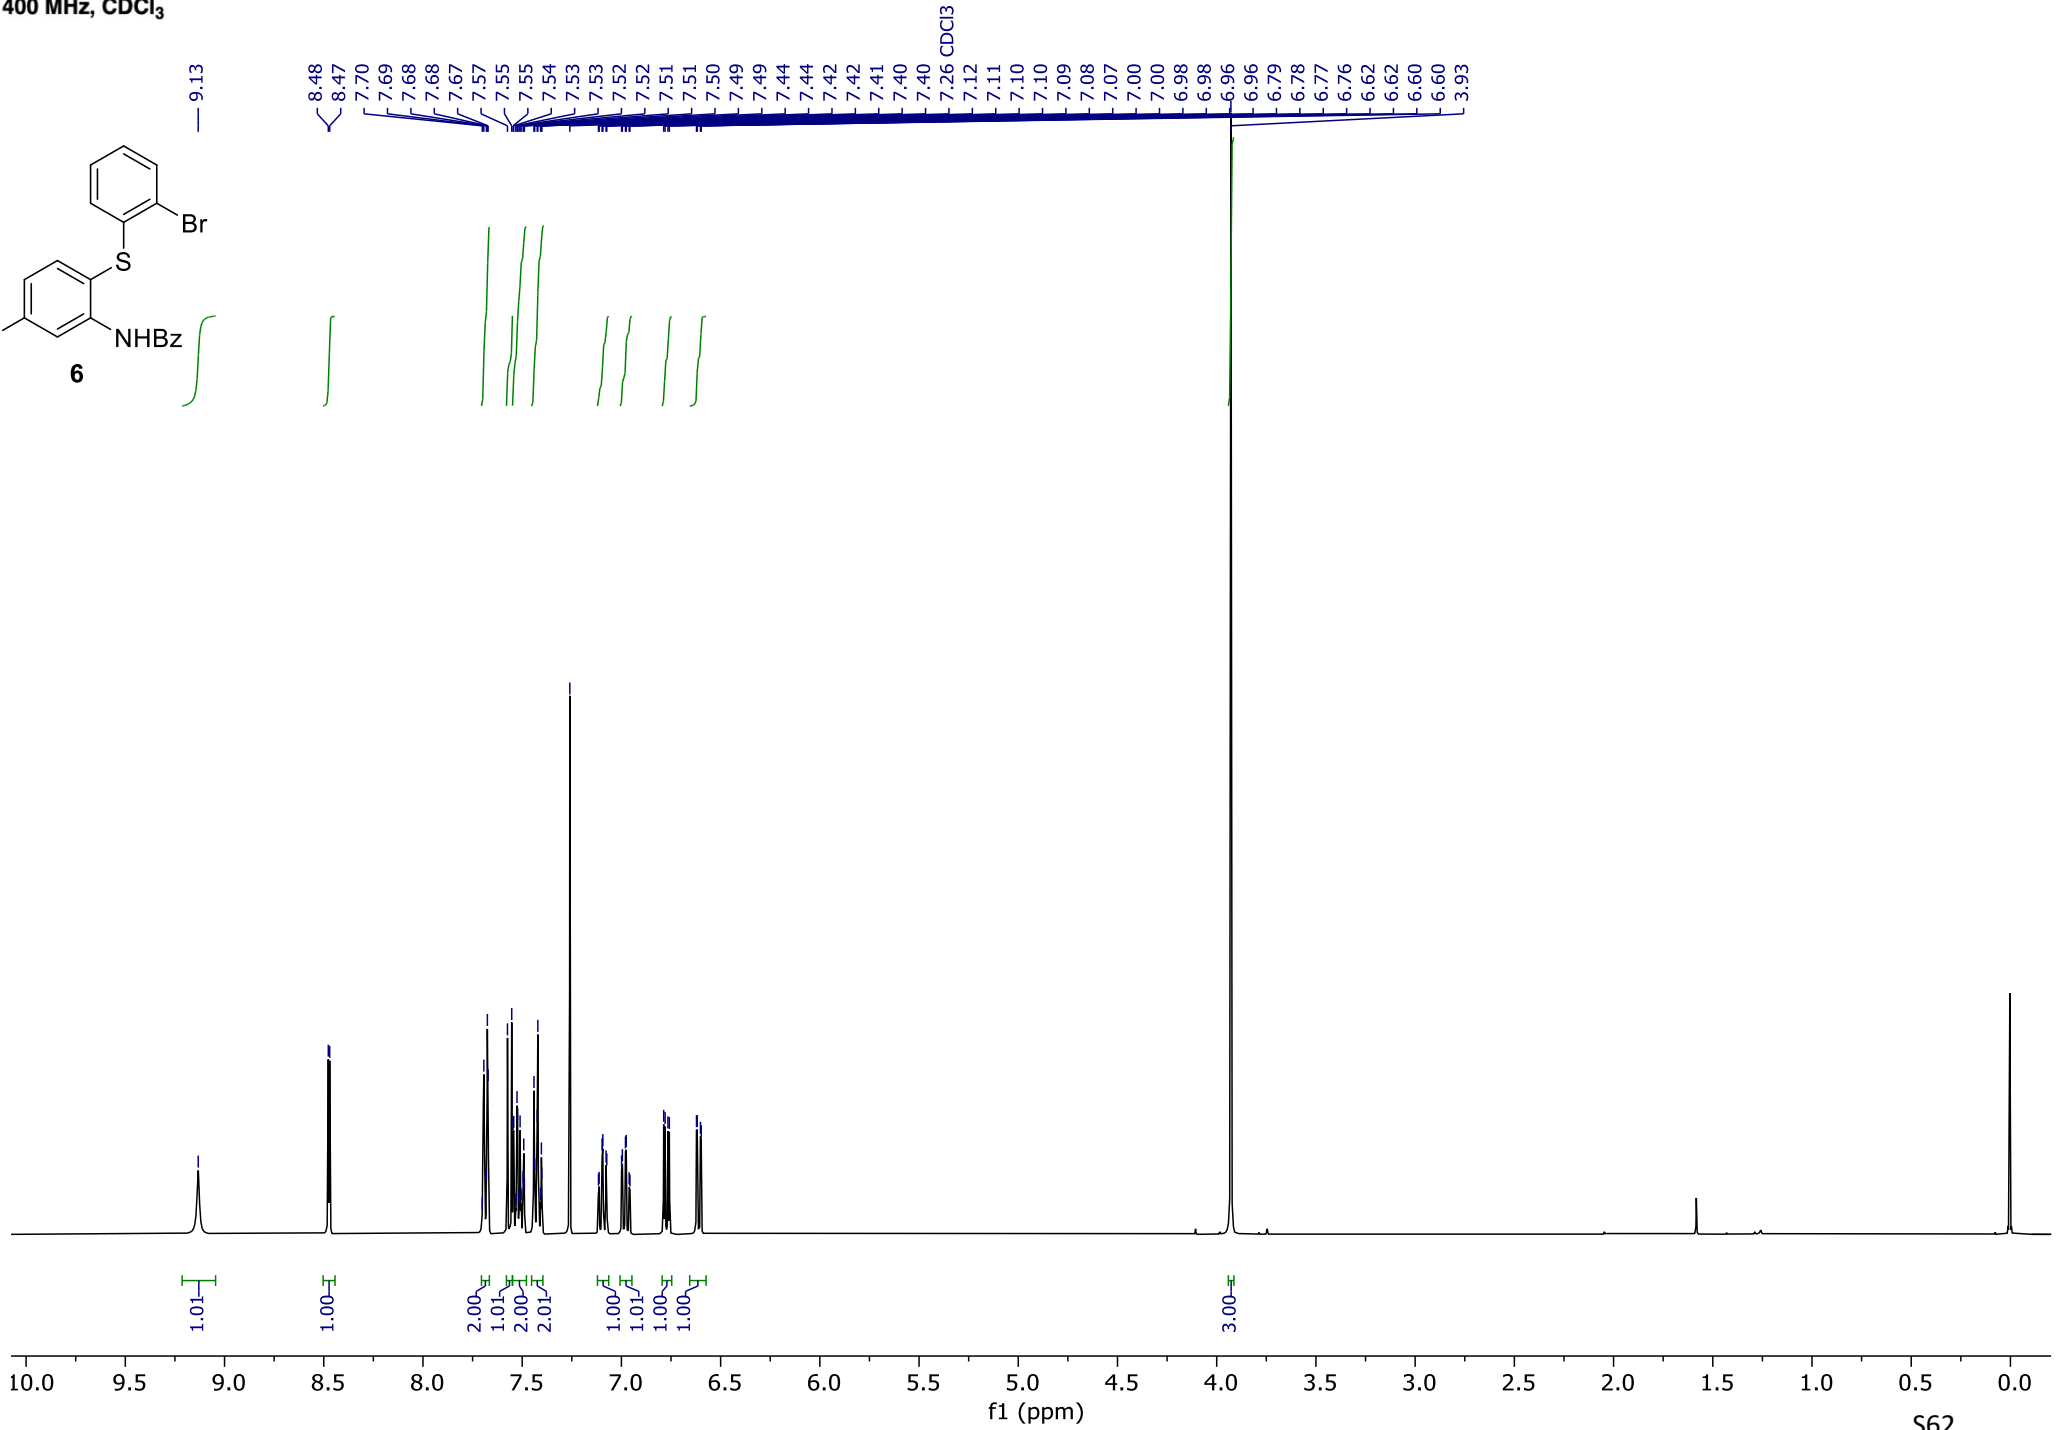

101 MHz, CDCl<sub>3</sub>

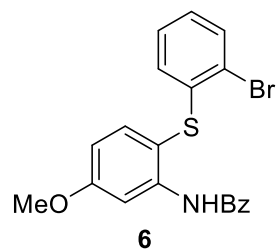

165.37  
162.70

141.93  
138.41  
137.90  
134.59  
133.07  
132.22  
128.98  
128.34  
127.13  
127.10  
126.84  
120.79

111.70  
109.36  
105.61

77.16 CDCl<sub>3</sub>

55.77

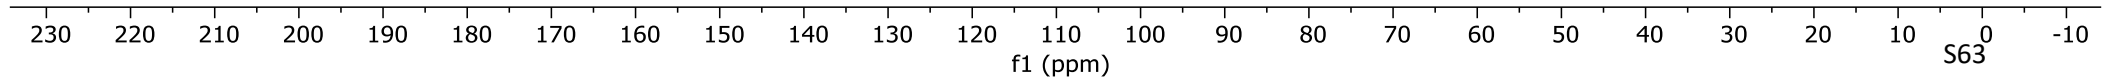

400 MHz, CDCl<sub>3</sub>

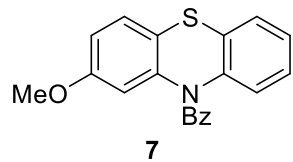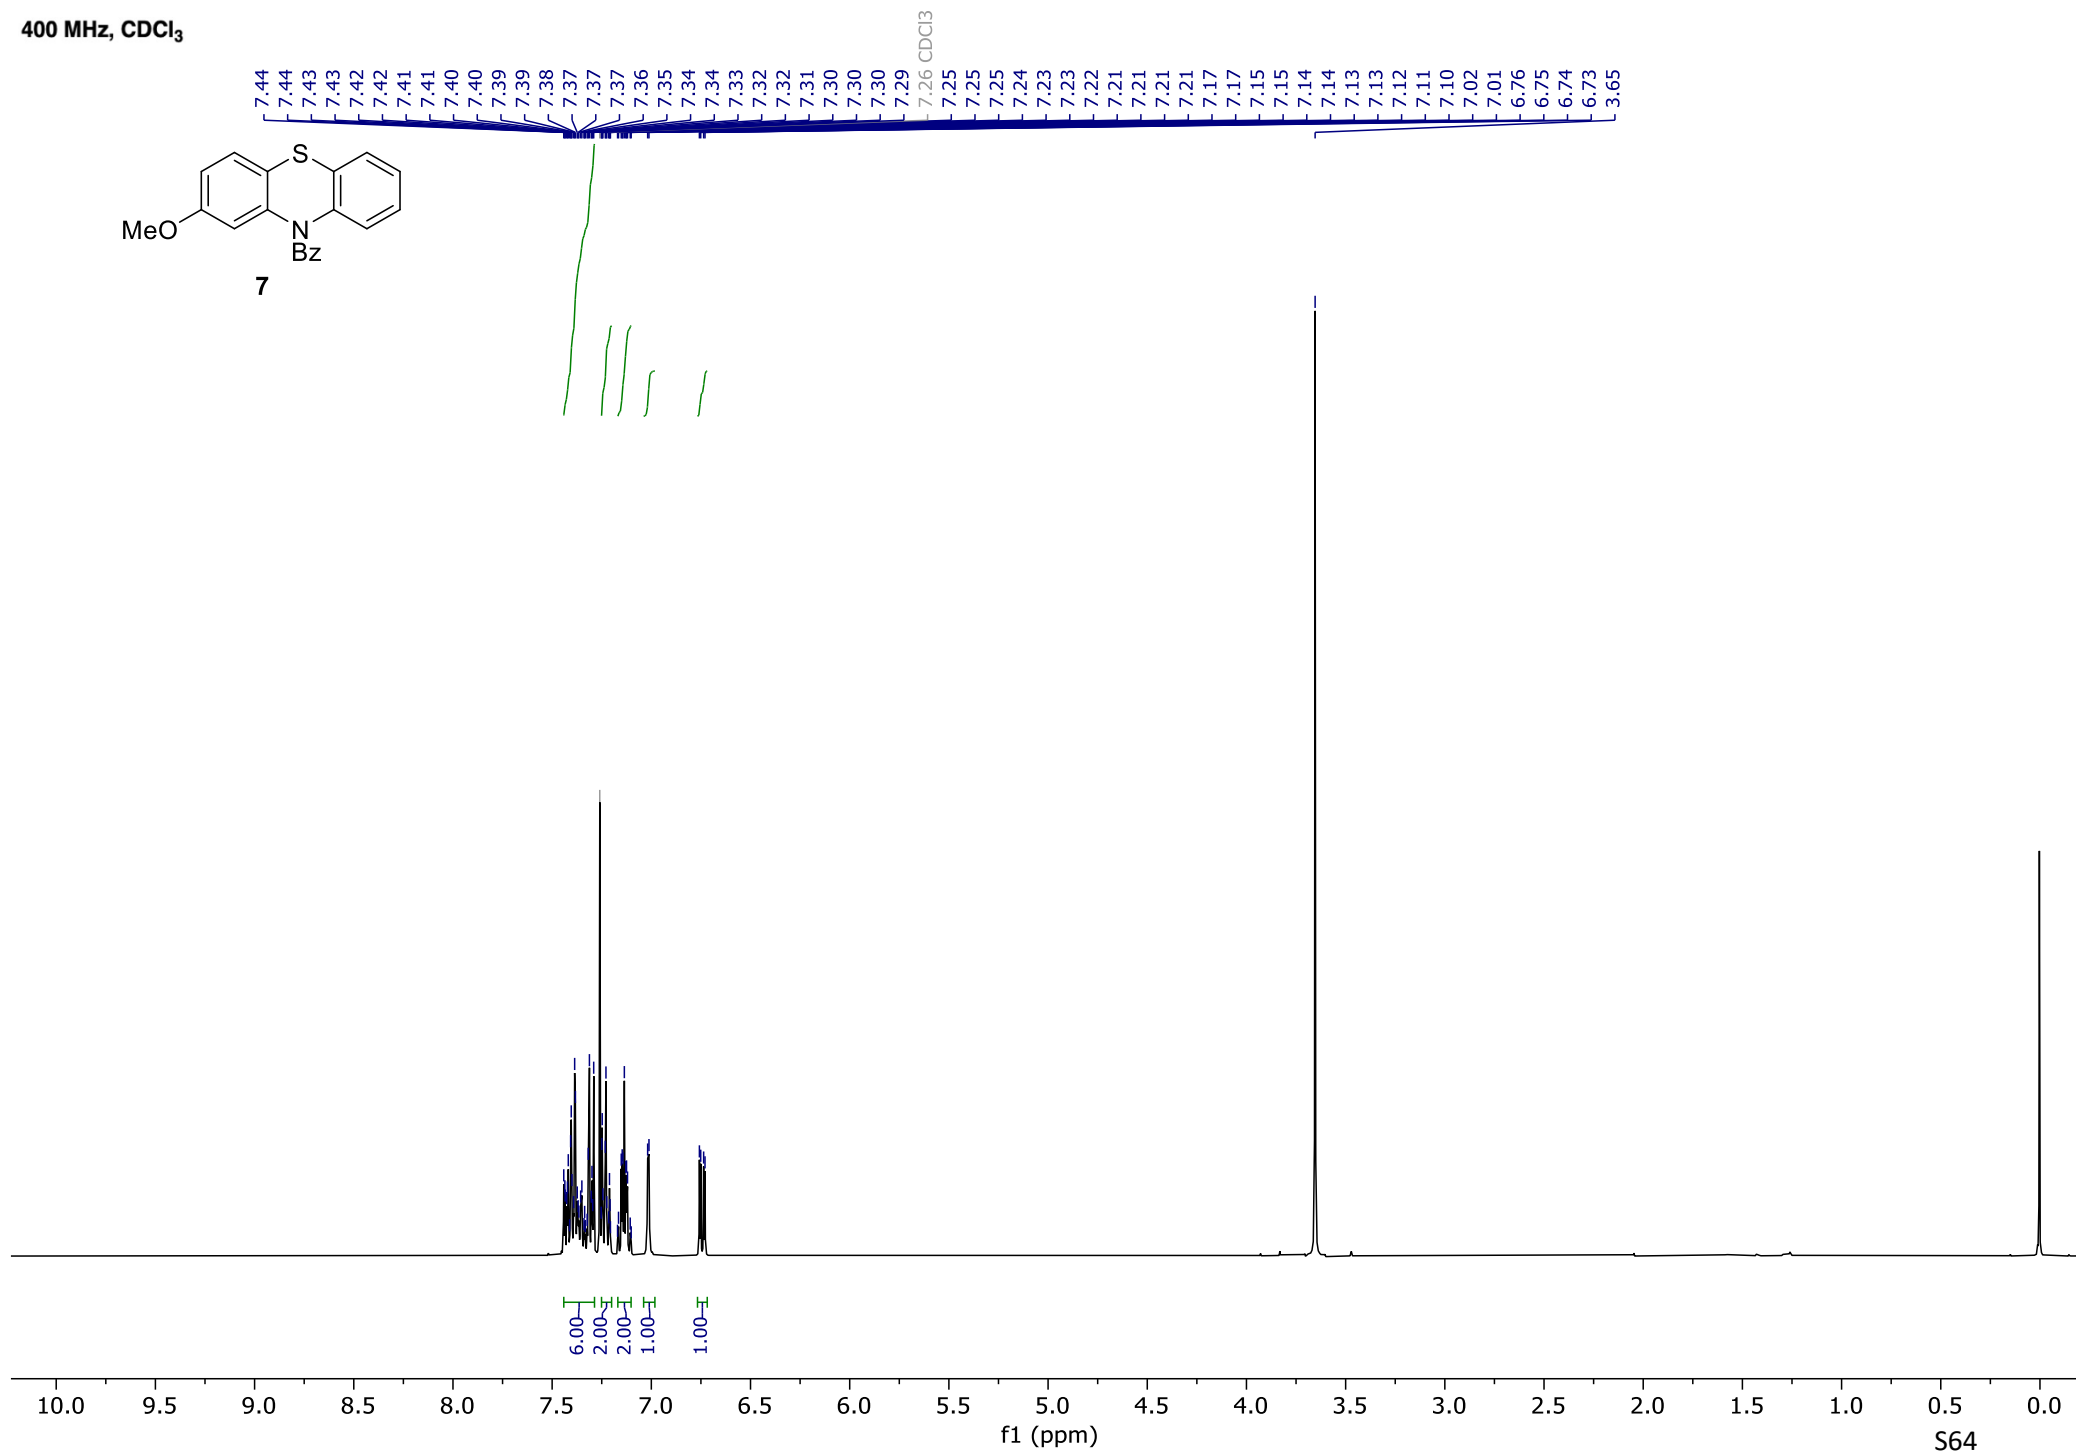



101 MHz, CDCl<sub>3</sub>

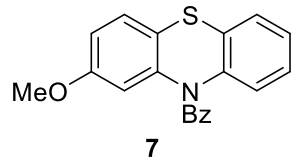

— 169.05

— 159.10

— 140.80

— 139.66

— 135.43

— 133.01

— 130.53

— 128.91

— 128.15

— 128.15

— 127.77

— 127.21

— 126.85

— 126.53

— 123.03

— 113.60

— 112.82

— 77.16 CDCl<sub>3</sub>

— 55.74

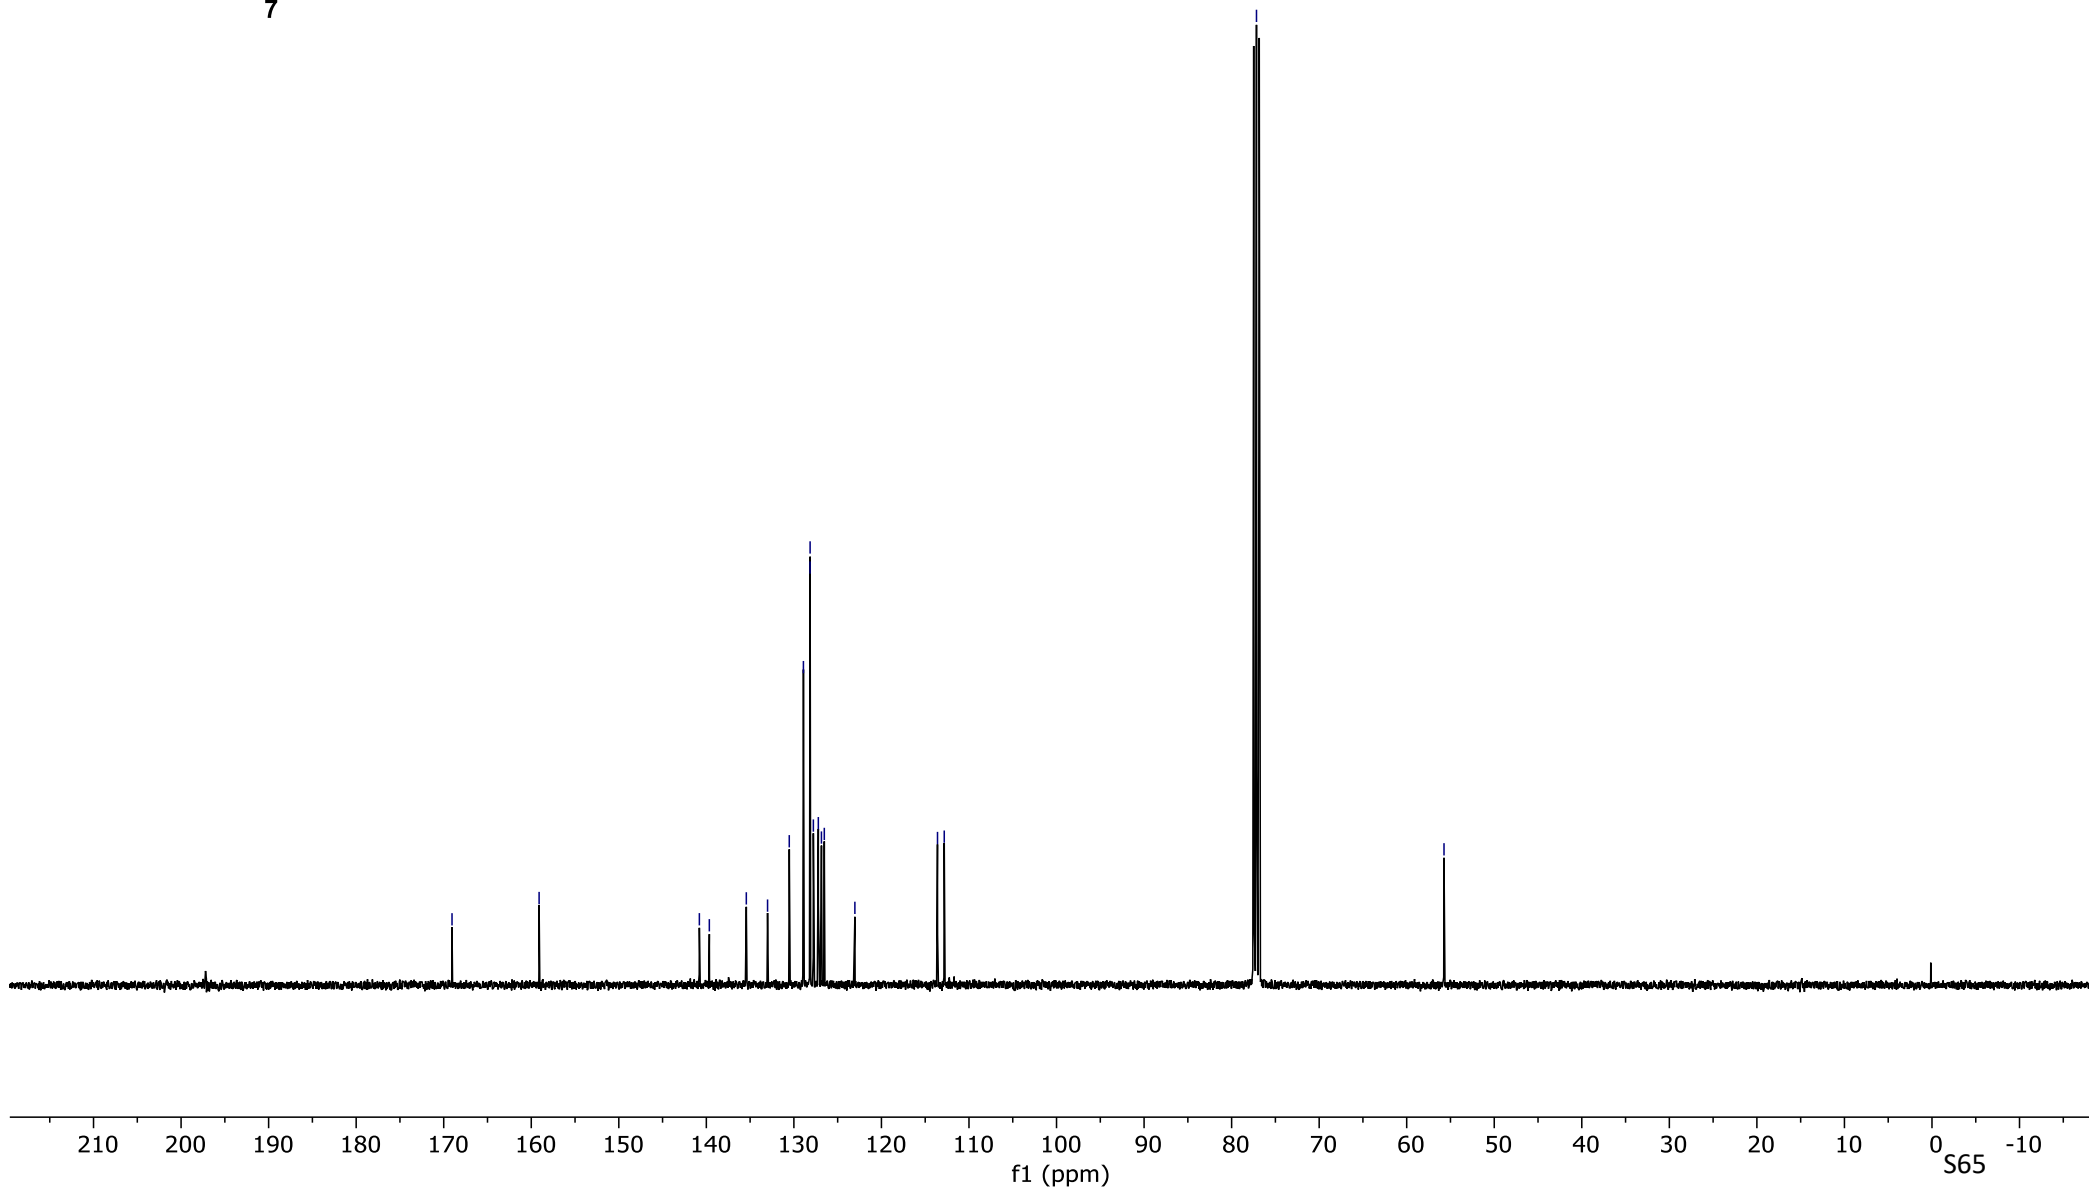

400 MHz, DMSO-d<sub>6</sub>

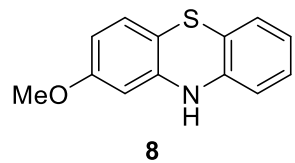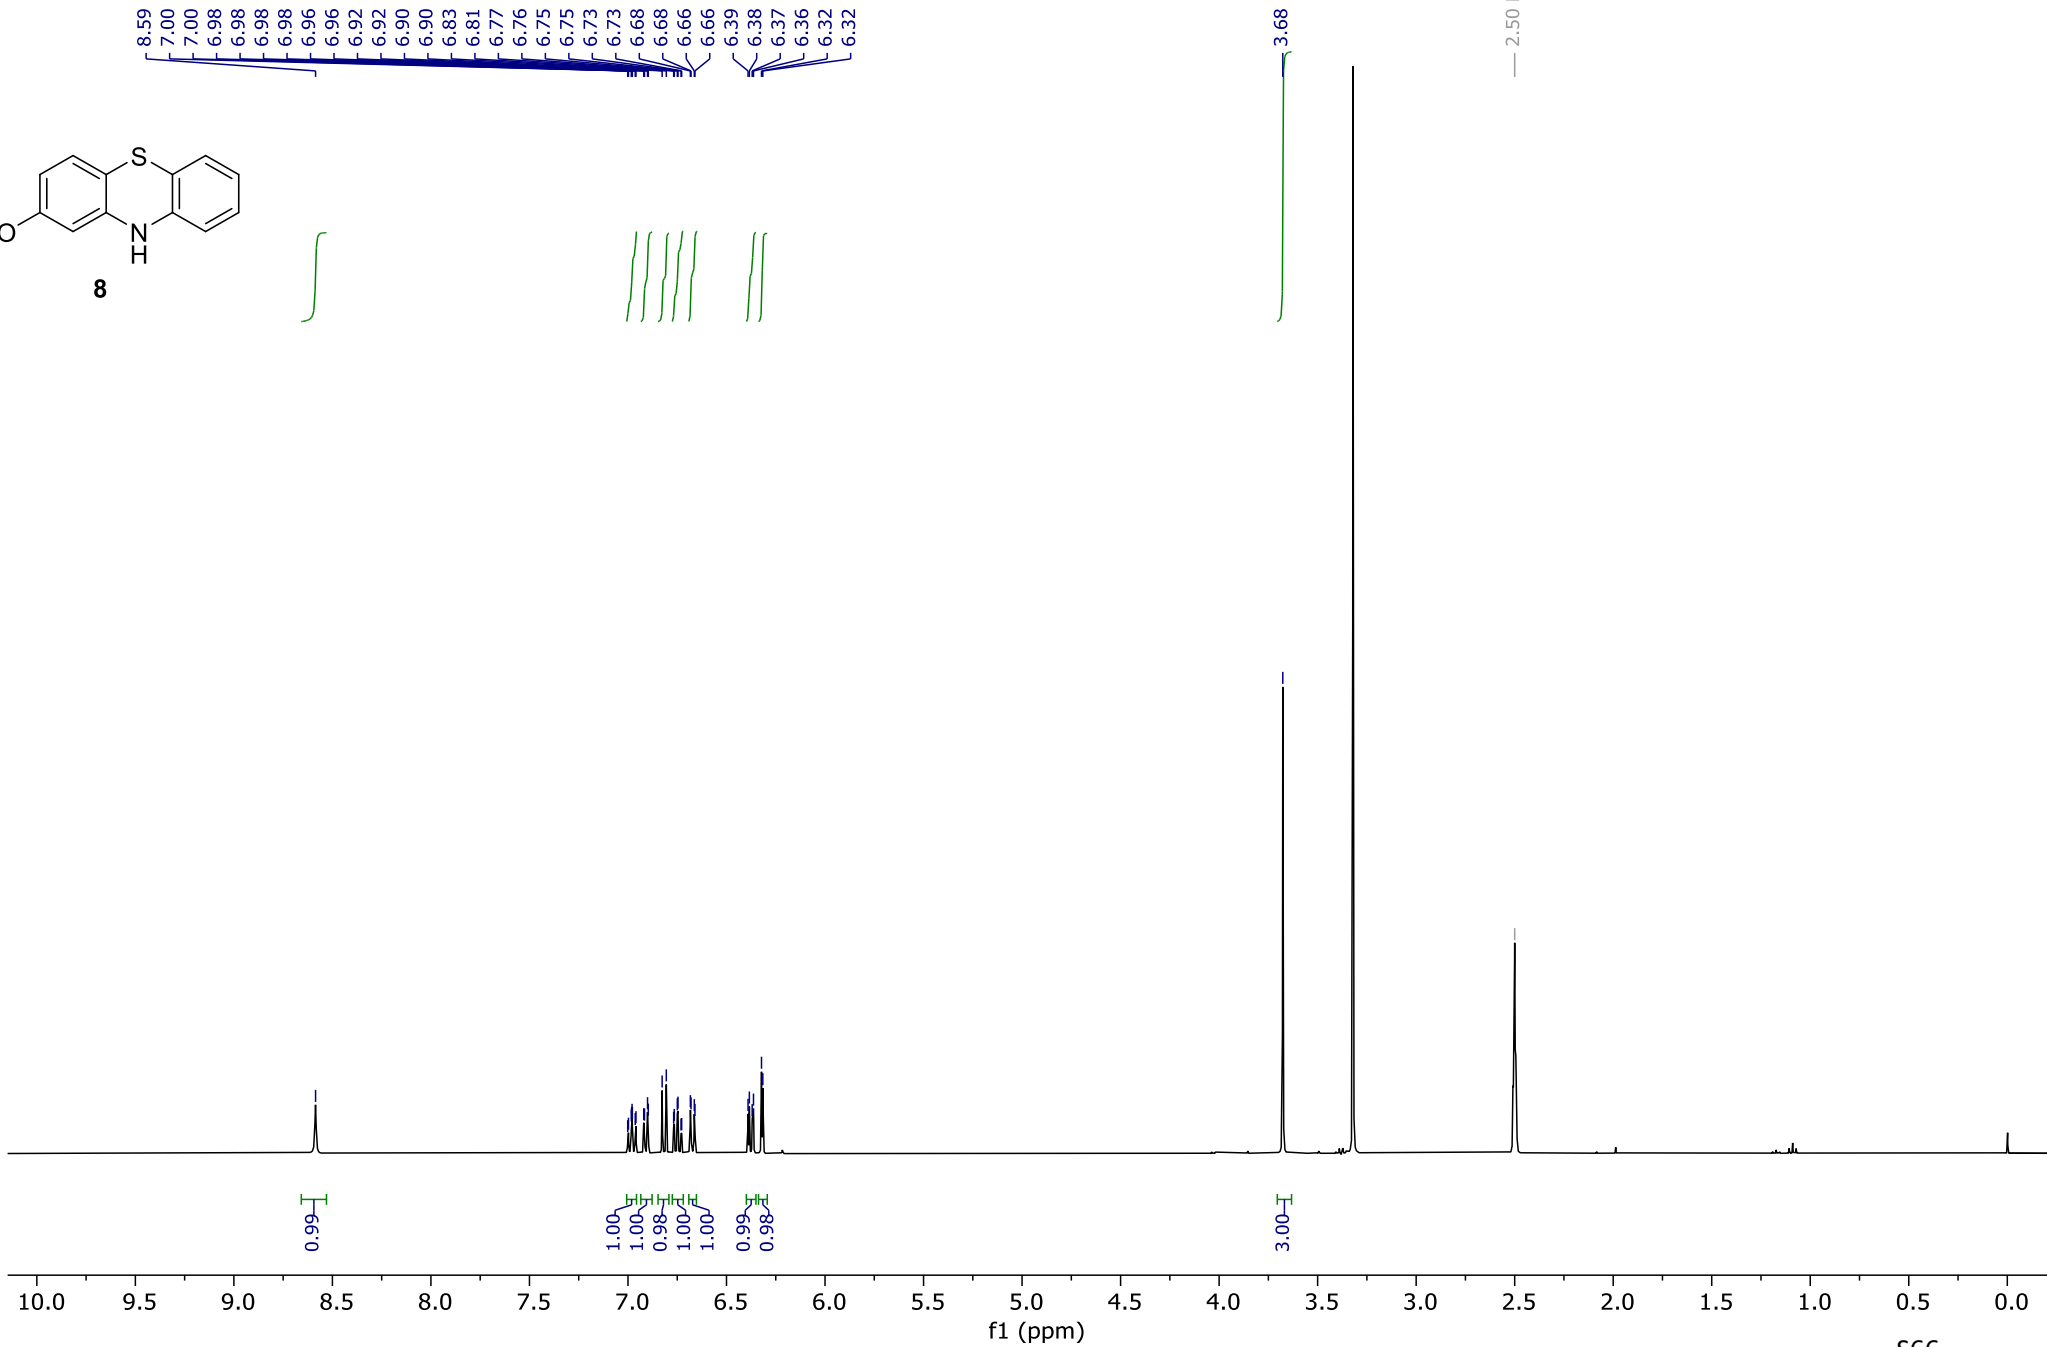

101 MHz, DMSO-*d*<sub>6</sub>

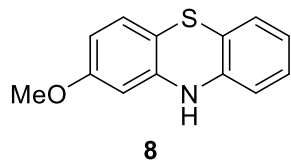

- 159.25
- 143.34
- 141.81
- 127.35
- 126.81
- 126.18
- 121.75
- 116.99
- 114.44
- 107.21
- 107.14
- 100.74
- 55.03

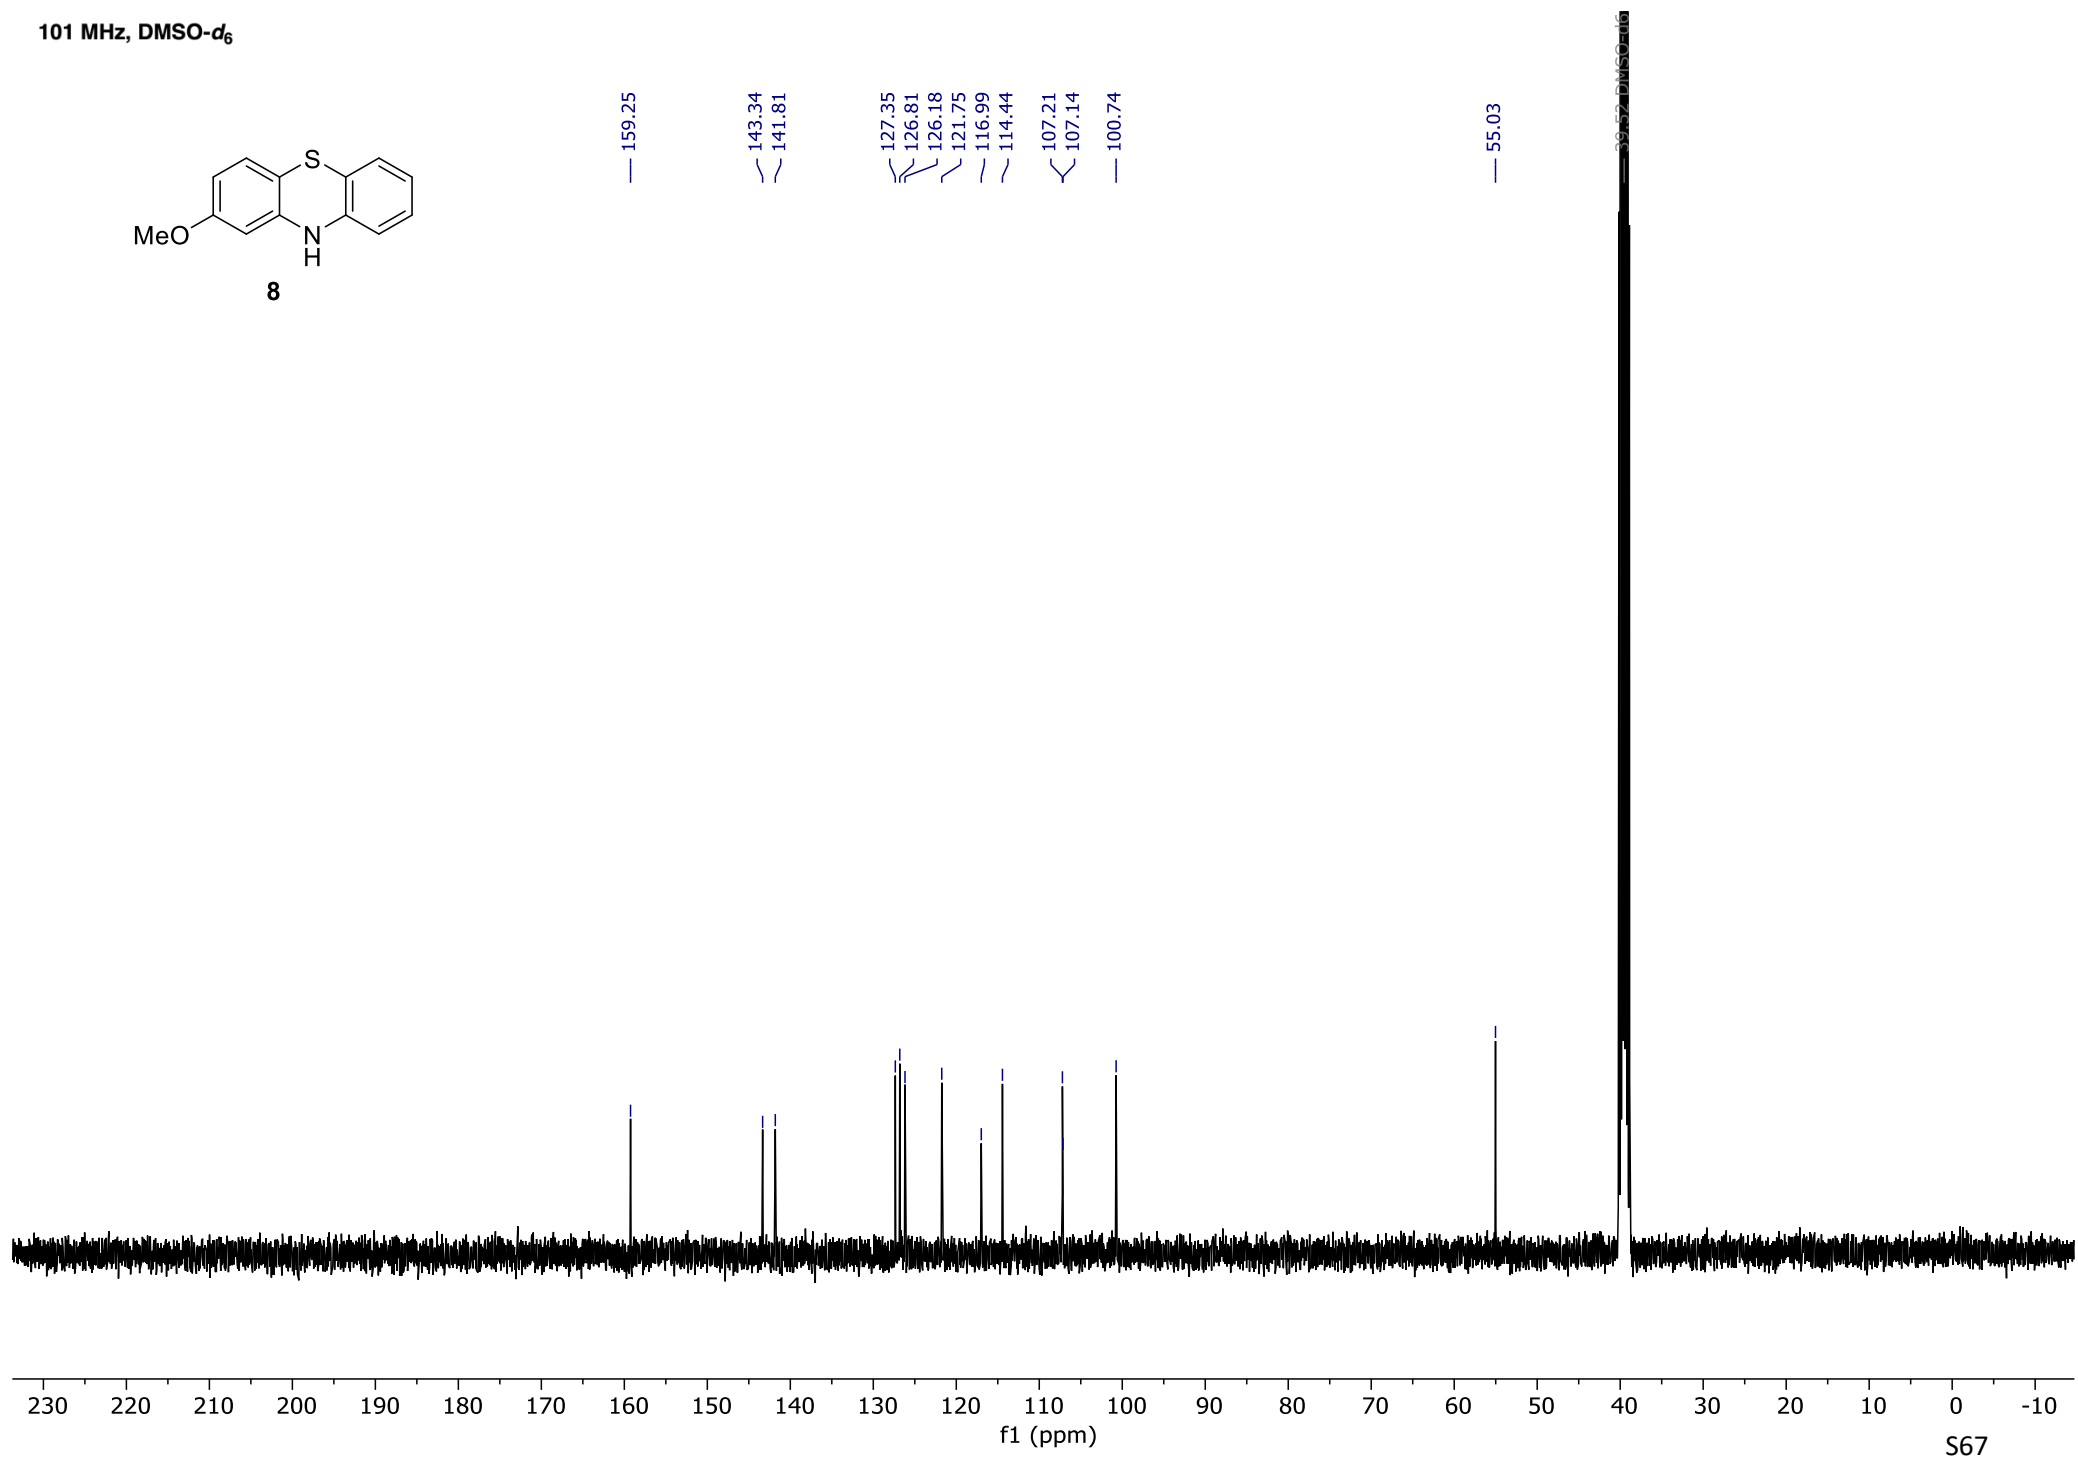

400 MHz, CDCl<sub>3</sub>

7.26 CDCl<sub>3</sub>  
7.16  
7.15  
7.15  
7.15  
7.14  
7.14  
7.13  
7.13  
7.12  
7.12  
7.04  
7.03  
7.02  
7.01  
6.93  
6.92  
6.91  
6.90  
6.89  
6.88  
6.88  
6.88  
6.50  
6.49  
6.49  
6.48  
6.47

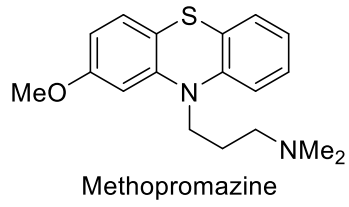

3.92  
3.90  
3.88  
3.78  
2.46  
2.44  
2.42  
2.23  
2.02  
2.00  
1.98  
1.97  
1.95

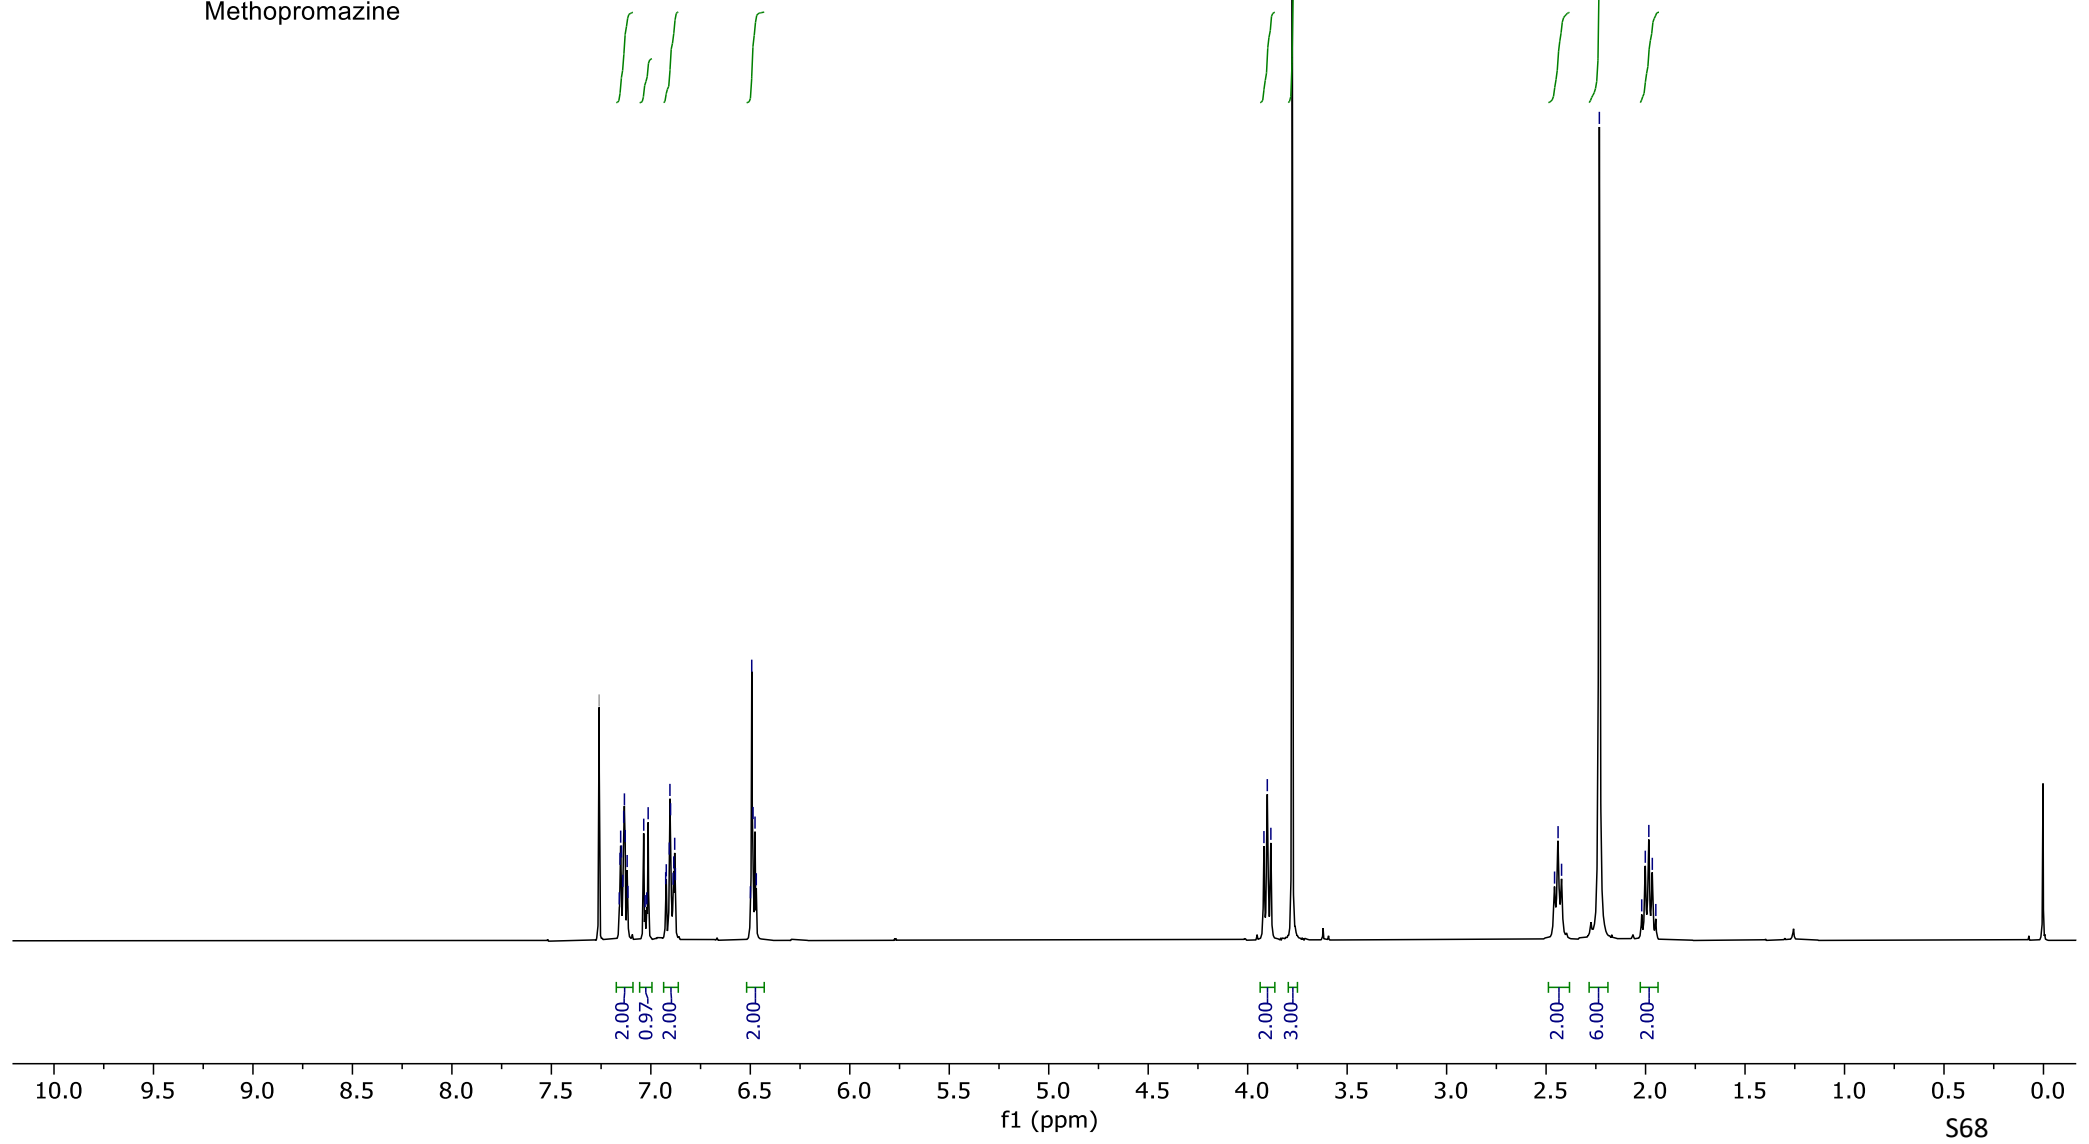

101 MHz, CDCl<sub>3</sub>

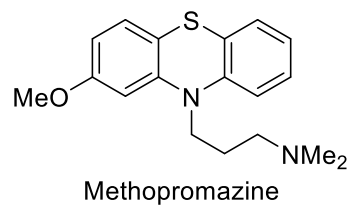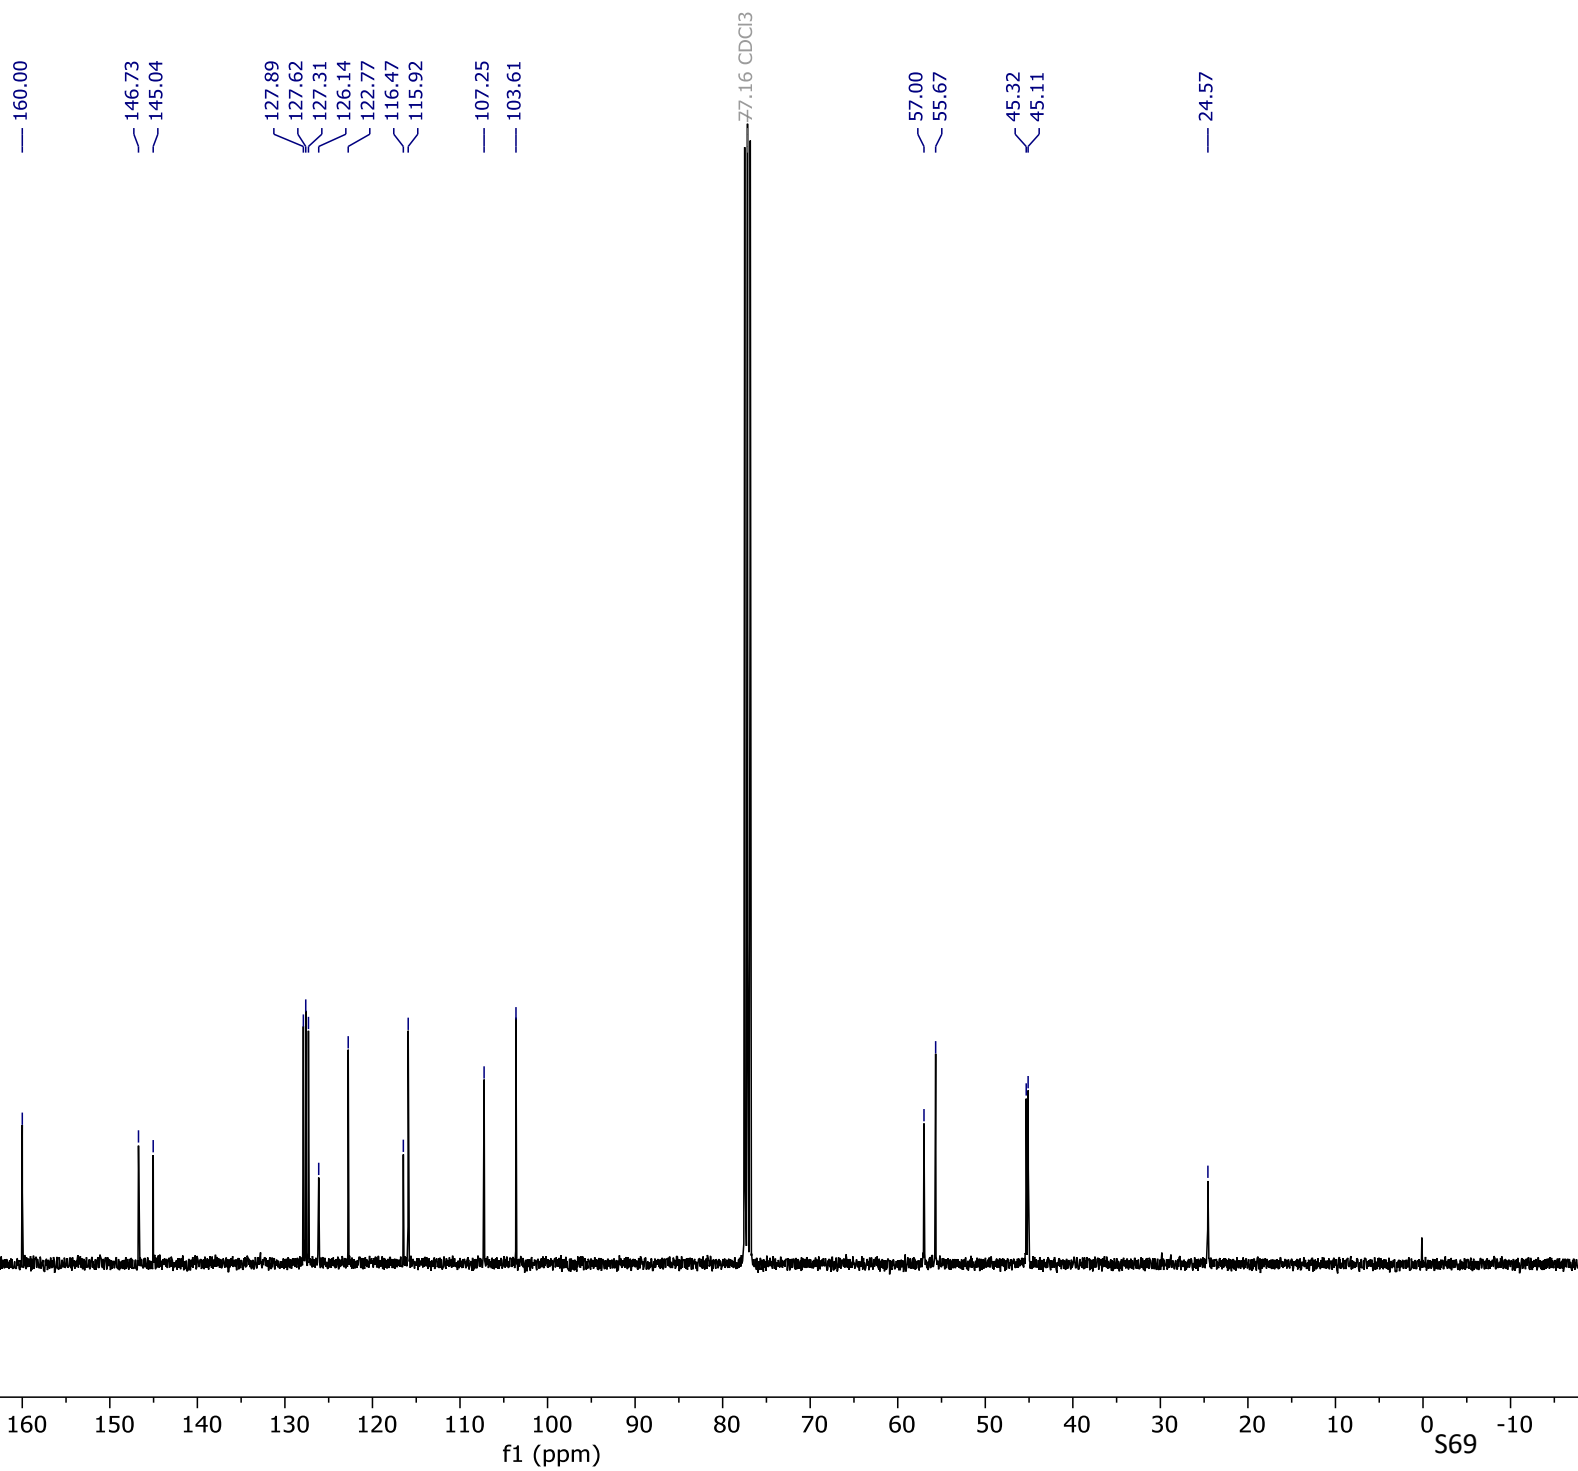

Supplement: d2ob01082h1.pdf [file d2ob01082h1.pdf]
